# Supplementary material for: A remarkably diverse and well-organized virus community in a filter-feeding oyster
Source: PubMed Central journal article supplement (PMC9825006; doi:10.1186/s40168-022-01431-8), 2023-01-07
Supplement: 40168_2022_1431_MOESM3_ESM.pdf [file 40168_2022_1431_MOESM3_ESM.pdf]

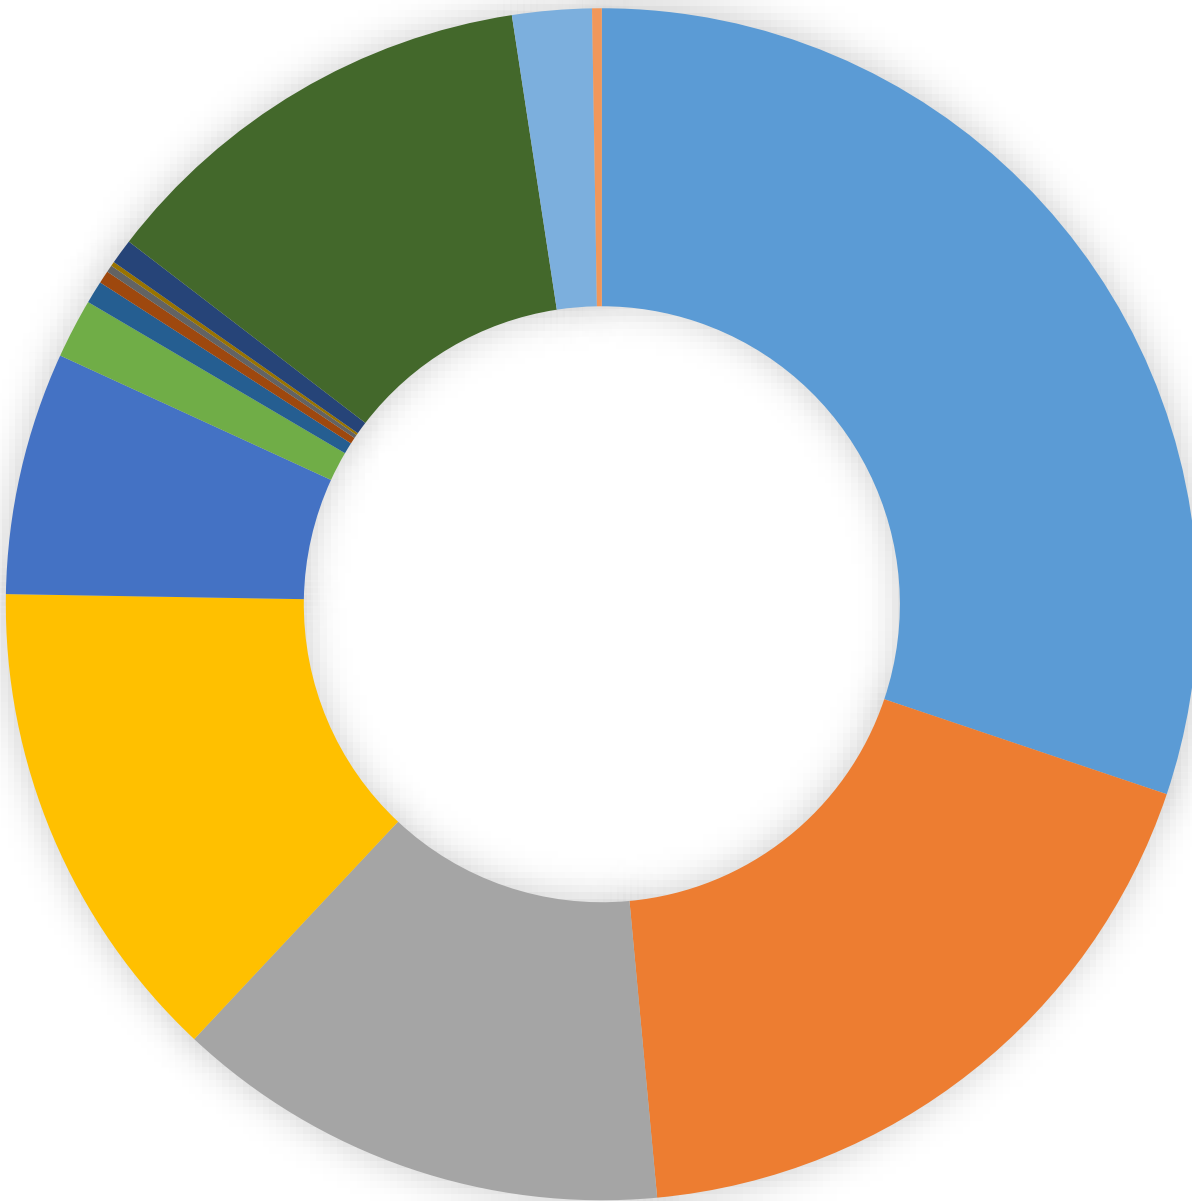

- Siphoviridae - 30.16%
- Myoviridae - 18.36%
- Podoviridae - 13.46%
- unclassified DNA viruses - 13.29%
- unclassified Caudovirales - 6.58%
- Microviridae - 1.61%
- Circoviridae - 0.61%
- Phycodnaviridae - 0.35%
- Ackermannviridae - 0.19%
- Parvoviridae - 0.12%
- unclassified Riboviria - 0.68%
- unclassified viruses - 12.18%
- environmental samples - 2.15%
- Circular genetic element sp - 0.26%
