# Supplementary material for: A remarkably diverse and well-organized virus community in a filter-feeding oyster
Source: PubMed Central journal article supplement (PMC9825006; doi:10.1186/s40168-022-01431-8), 2023-01-07
Supplement: 40168_2022_1431_MOESM4_ESM.pdf [file 40168_2022_1431_MOESM4_ESM.pdf]

## 6. PhaGCN / 7. Megan6 Taxonomy

- Circoviridae
- Podoviridae
- Microviridae
- Bacteria
- Eukaryota
- Autographiviridae
- Myoviridae
- Genomoviridae
- Parvoviridae
- Riboviria
- Cruciviridae
- Siphoviridae
- Archaea
- Demerecviridae
- Bacilladnaviridae
- Not Virus
- Unclassified Virus

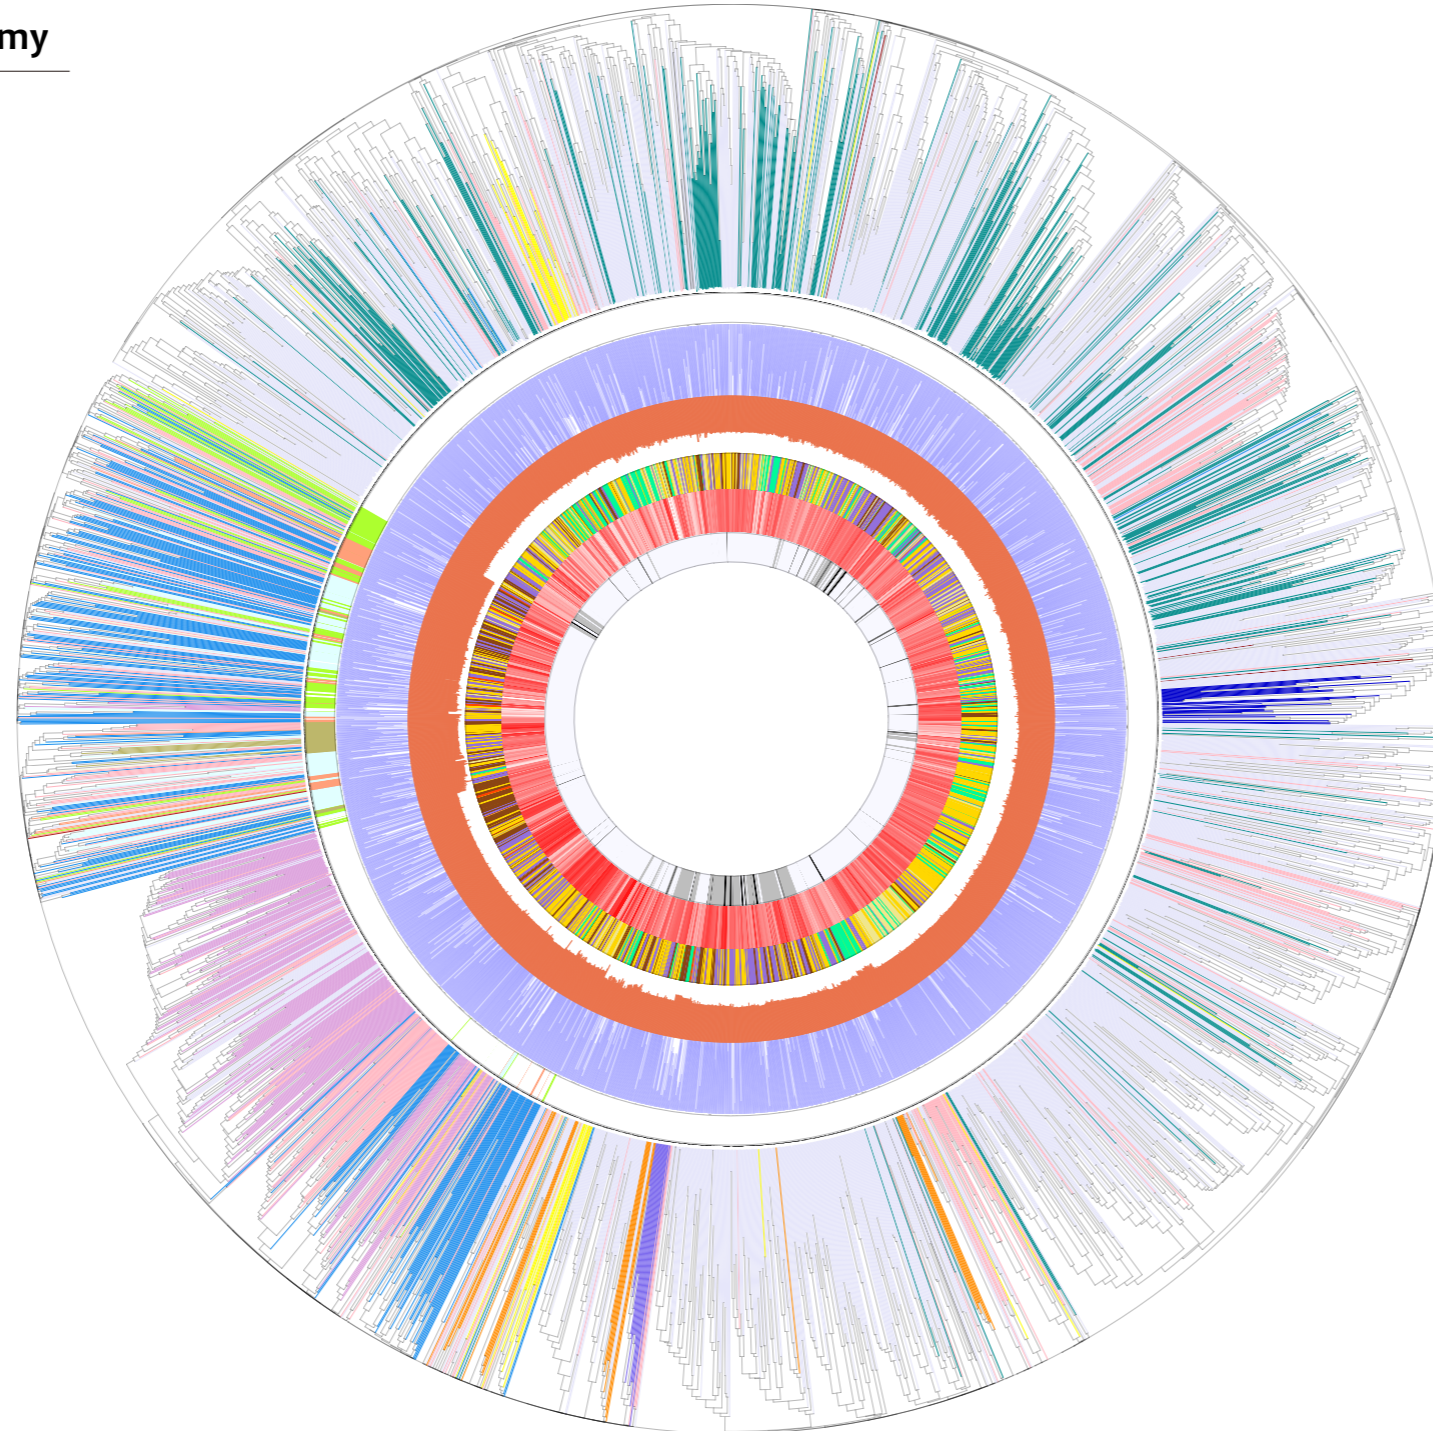

### 1. Warning

- no viral genes detected
- contig >1.5x longer than expected genome length
- both

### 2. GC content

- min 24.74
- med 44.62
- max 65.70

### 3. Completeness Methods

- AAI-based (medium-confidence)
- AAI-based (high-confidence)
- DTR (medium-confidence)
- DTR (high-confidence)
- HMM-based (lower-bound)
- ITR (high-confidence)

### 4. Length

- $\log_{10}$  (1,206 bp ~ 260,277 bp)

### 5. Genome Completeness

- 90% ~ 100%
