# Supplementary material for: A remarkably diverse and well-organized virus community in a filter-feeding oyster
Source: PubMed Central journal article supplement (PMC9825006; doi:10.1186/s40168-022-01431-8), 2023-01-07

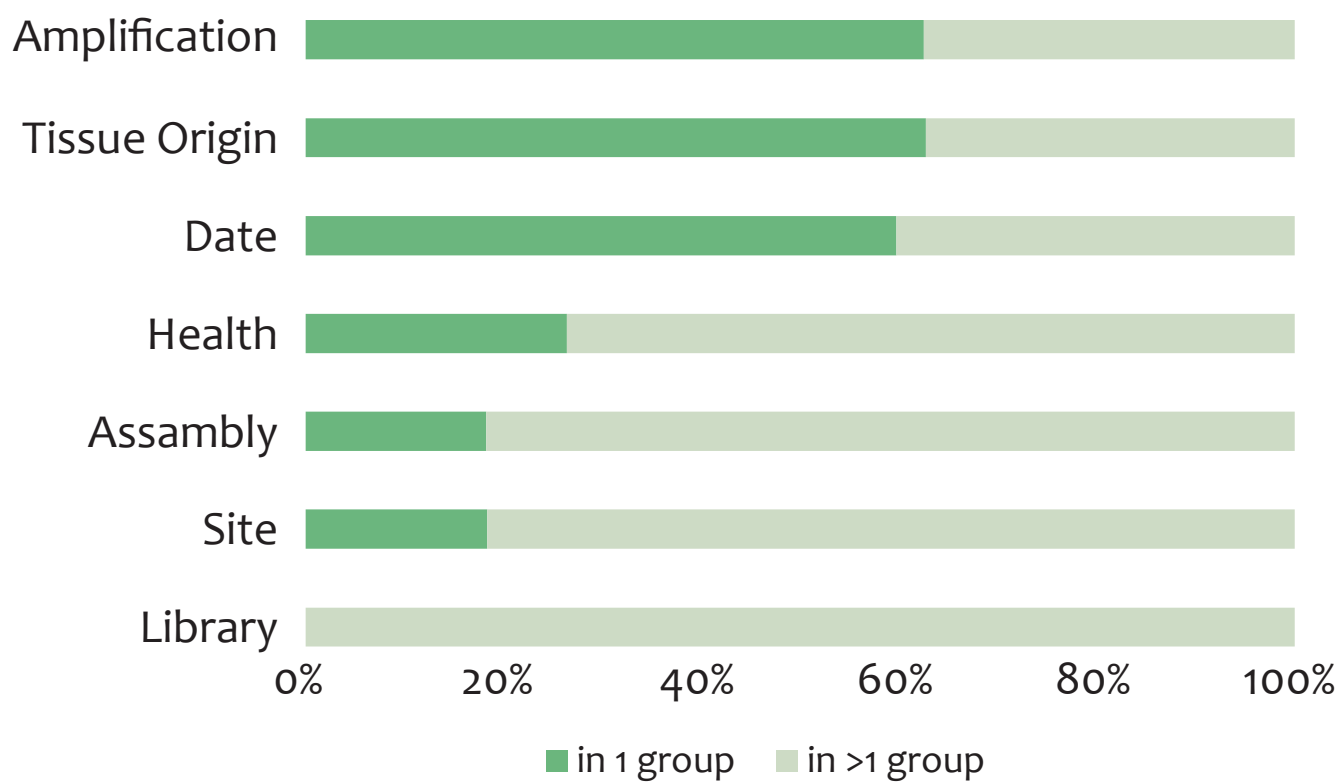

Supplement: 40168_2022_1431_MOESM11_ESM.pdf [file 40168_2022_1431_MOESM11_ESM.pdf]
