# Supplementary material for: A remarkably diverse and well-organized virus community in a filter-feeding oyster
Source: Microbiome. 2023 Jan 7;11:2. doi: 10.1186/s40168-022-01431-8 (PMC9825006; doi:10.1186/s40168-022-01431-8)
Supplement: Supplementary file 15 — Additional file 14: Table S2. Near-complete viral genomes in the Dataset of Oyster Virome (DOV) identified by CheckV. [file 40168_2022_1431_MOESM14_ESM.xlsx]

## Sheet: Sheet1
contig_id	Taxonomy	Length	log10(Length)	identity	percent_length	GC-content	gene_count	viral_genes	host_genes	checkv_quality	completeness	completeness_method	contamination	kmer_freq	warnings	aligned_genes	percent_genes	aligned_length	score
ZHr1-k141_9912	Unclassified Virus	1706	3.23198	41.2	38.58	42.85	3	2	0	High-quality	100	AAI-based (high-confidence)	0	1		1	33.33	196	80.75
ZHr1-k141_5404	Genomoviridae	2142	3.33082	42.9	15.88	49.07	3	2	0	High-quality	96.34	AAI-based (high-confidence)	0	1		1	33.33	94	40.33
ZHr1-k141_536	Unclassified Virus	2237	3.34967	25.4	43.25	35.63	3	3	0	High-quality	97.14	HMM-based (lower-bound)	0	1		1	33.33	285	72.39
ZHr1-k141_51095	Unknown	1982	3.2971	44.8	40.68	43.14	3	2	0	Complete	100	DTR (high-confidence)	0	1.1		1	33.33	214	95.87
ZHr1-k141_50614	Unclassified Virus	1957	3.29159	23.6	38.44	46.35	3	3	0	Complete	100	DTR (medium-confidence)	0	1.1		1	33.33	241	56.88
ZHr1-k141_50598	Unknown	1908	3.28058	0	0	46.86	3	1	0	Complete	100	DTR (medium-confidence)	0	1.1
ZHr1-k141_50502	Unclassified Virus	1643	3.21564	37.7	52.78	54.66	3	1	0	Complete	100	DTR (high-confidence)	0	1.1		1	33.33	247	93.12
ZHr1-k141_50390	Unclassified Virus	3032	3.48173	24.8	32.72	43.37	4	1	0	Complete	100	DTR (high-confidence)	0	1		1	25	285	70.68
ZHr1-k141_50372	Unclassified Virus	1860	3.26951	34.1	40.59	46.88	3	1	0	Complete	100	DTR (high-confidence)	0	1.1		1	33.33	220	75.02
ZHr1-k141_5035	Unclassified Virus	1746	3.24204	21.6	47.49	44.67	2	2	0	High-quality	100	AAI-based (medium-confidence)	0	1		1	50	237	51.19
ZHr1-k141_50329	Unclassified Virus	1811	3.25792	36.4	45.66	39.43	3	2	0	Complete	100	DTR (high-confidence)	0	1.1		1	33.33	226	82.26
ZHr1-k141_50303	Unclassified Virus	1772	3.24846	48.9	43.06	46.33	3	2	0	Complete	100	DTR (high-confidence)	0	1.1		1	33.33	217	106.11
ZHr1-k141_50292	Unclassified Virus	1960	3.29226	0	0	44.95	3	3	0	Complete	100	DTR (high-confidence)	0	1.1
ZHr1-k141_50163	Unclassified Virus	1723	3.23629	29.3	45.64	37.72	3	1	0	Complete	100	DTR (high-confidence)	0	1.1		1	33.33	220	64.46
ZHr1-k141_50061	Unknown	1856	3.26858	28.4	53.11	41.97	2	1	0	Complete	100	DTR (medium-confidence)	0	1.1		1	50	265	75.26
ZHr1-k141_49994	Circoviridae	1905	3.27989	35.1	56.08	51.23	2	2	0	Complete	100	DTR (high-confidence)	0	1.1		1	50	249	87.4
ZHr1-k141_49958	Unclassified Virus	1803	3.256	0	0	37.77	3	2	0	Complete	100	DTR (medium-confidence)	0	1.1
ZHr1-k141_49852	Unclassified Virus	1727	3.23729	41.7	51.95	45.8	2	2	0	Complete	100	DTR (high-confidence)	0	1.1		1	50	227	94.66
ZHr1-k141_49832	Unclassified Virus	2074	3.31681	28.4	52.57	46	3	1	0	Complete	100	DTR (high-confidence)	0	1.1		1	33.33	286	81.22
ZHr1-k141_49769	Unclassified Virus	1835	3.26364	33.8	35.75	46.16	3	2	0	Complete	100	DTR (medium-confidence)	0	1.1		1	33.33	197	66.59
ZHr1-k141_49663	Unknown	1955	3.29115	34	23.2	44.5	3	2	0	Complete	100	DTR (high-confidence)	0	1.1		1	33.33	90	30.6
ZHr1-k141_49624	Unclassified Virus	2054	3.3126	30.7	45.57	44.99	3	1	0	Complete	100	DTR (high-confidence)	0	1.1		1	33.33	257	78.9
ZHr1-k141_49599	Unclassified Virus	1999	3.30081	55	39.67	42.72	3	2	0	Complete	100	DTR (high-confidence)	0	1.1		1	33.33	217	119.35
ZHr1-k141_49564	Circoviridae	2608	3.41631	23	50.41	46.93	5	2	0	Complete	100	DTR (high-confidence)	0	1.1		1	20	368	84.64
ZHr1-k141_49526	Unclassified Virus	1865	3.27068	23.3	54.73	39.03	2	2	0	Complete	100	DTR (medium-confidence)	0	1.1		1	50	272	63.38
ZHr1-k141_49412	Unclassified Virus	1789	3.25261	50.7	47.03	49.92	3	1	0	Complete	100	DTR (high-confidence)	0	1.1		1	33.33	222	112.55
ZHr1-k141_49392	Unclassified Virus	1817	3.25935	29.5	42.66	53.38	3	1	0	Complete	100	DTR (medium-confidence)	0	1.1		1	33.33	212	62.54
ZHr1-k141_49390	Unclassified Virus	1817	3.25935	23.5	46.01	43.04	3	1	0	Complete	100	DTR (medium-confidence)	0	1.1		1	33.33	248	58.28
ZHr1-k141_49361	Circoviridae	2056	3.31302	25.3	58.32	41.39	3	2	0	Complete	100	DTR (medium-confidence)	0	1.1		1	33.33	347	87.79
ZHr1-k141_49320	Unknown	1907	3.28035	0	0	34.08	3	2	0	Complete	100	DTR (high-confidence)	0	1.1
ZHr1-k141_49284	Unclassified Virus	2005	3.30211	51.2	38.9	46.48	4	1	0	Complete	100	DTR (high-confidence)	0	1.1		1	25	226	115.71
ZHr1-k141_49246	Unclassified Virus	1921	3.28353	46.7	38.5	46.28	3	3	0	Complete	100	DTR (high-confidence)	0	1.1		1	33.33	206	96.2
ZHr1-k141_49238	Unclassified Virus	1825	3.26126	38.5	47.61	52.22	2	2	0	Complete	100	DTR (high-confidence)	0	1.1		1	50	189	72.77
ZHr1-k141_49224	Unknown	1787	3.25212	46.4	49.67	44.43	2	1	0	Complete	100	DTR (high-confidence)	0	1.1		1	50	227	105.33
ZHr1-k141_49206	Unclassified Virus	1753	3.24378	36.2	36.97	46.43	4	2	0	Complete	100	DTR (high-confidence)	0	1.1		1	25	220	79.64
ZHr1-k141_49198	Unclassified Virus	2053	3.31239	46.2	27.95	38.63	4	1	0	Complete	100	DTR (high-confidence)	0	1.1		1	25	173	79.93
ZHr1-k141_49180	Unclassified Virus	1826	3.2615	39.1	54.11	43.15	2	2	0	Complete	100	DTR (high-confidence)	0	1.1		1	50	224	87.58
ZHr1-k141_49159	Unclassified Virus	1933	3.28623	28.8	41.88	40.71	3	2	0	Complete	100	DTR (high-confidence)	0	1.1		1	33.33	227	65.38
ZHr1-k141_49158	Unknown	1942	3.28825	31	41.96	40.83	3	2	0	Complete	100	DTR (high-confidence)	0	1.1		1	33.33	227	70.37
ZHr1-k141_49150	Unclassified Virus	1970	3.29447	35.3	78.1	43.1	3	0	0	Complete	100	DTR (high-confidence)	0	1.1	no viral genes detected	1	33.33	296	104.49
ZHr1-k141_4795	Unclassified Virus	1819	3.25983	34.9	32.71	44.09	3	0	0	High-quality	97.91	AAI-based (medium-confidence)	0	1	no viral genes detected	1	33.33	88	30.71
ZHr1-k141_47103	Unclassified Virus	2815	3.44948	27	24.88	38.22	4	4	0	High-quality	98.04	HMM-based (lower-bound)	0	1		1	25	207	55.89
ZHr1-k141_4686	Unclassified Virus	1770	3.24797	34.8	32.84	48.81	3	3	0	High-quality	97.99	AAI-based (medium-confidence)	0	1		1	33.33	156	54.29
ZHr1-k141_46326	Unclassified Virus	2006	3.30233	45.84	60.95	38.53	3	2	0	Complete	100	DTR (high-confidence)	0	1.1		2	66.67	384	176.03
ZHr1-k141_45866	Circoviridae	2539	3.40466	26.8	32.94	45.81	3	1	0	High-quality	98.42	HMM-based (lower-bound)	0	1		1	33.33	221	59.23
ZHr1-k141_45832	Unclassified Virus	1721	3.23578	27	46.1	51.13	2	2	0	Complete	100	DTR (medium-confidence)	0	1		1	50	195	52.65
ZHr1-k141_4267	Circoviridae	2082	3.31848	47.5	41.22	49.14	2	1	0	Complete	100	DTR (medium-confidence)	0	1.1		1	50	209	99.28
ZHr1-k141_41827	Riboviria	3911	3.59229	45.8	45.54	39.96	3	1	0	High-quality	100	AAI-based (medium-confidence)	0	1		1	33.33	526	240.91
ZHr1-k141_40939	Riboviria	8898	3.94929	22.1	35.2	42.62	2	2	0	High-quality	96.16	AAI-based (high-confidence)	0	1		1	50	928	205.09
ZHr1-k141_3956	Unclassified Virus	1528	3.18412	72.4	47	47.64	2	1	0	High-quality	90.47	AAI-based (high-confidence)	0	1		1	50	196	141.9
ZHr1-k141_38140	Unclassified Virus	1649	3.21722	39.6	41.08	49.79	3	3	0	High-quality	96.06	AAI-based (medium-confidence)	0	1		1	33.33	205	81.18
ZHr1-k141_33915	Unclassified Virus	2501	3.39811	0	0	47.86	3	1	0	High-quality	96.95	HMM-based (lower-bound)	0	1.05
ZHr1-k141_33697	Unclassified Virus	1937	3.28713	0	0	46.57	3	2	0	High-quality	90.95	HMM-based (lower-bound)	0	1
ZHr1-k141_33108	Unclassified Virus	2518	3.40106	0	0	43.92	4	2	0	High-quality	98.44	HMM-based (lower-bound)	0	1
ZHr1-k141_30549	Unclassified Virus	2073	3.3166	37.9	35.59	52.73	4	1	0	High-quality	100	AAI-based (medium-confidence)	0	1		1	25	231	87.55
ZHr1-k141_30484	Unclassified Virus	3535	3.54839	27.8	33.45	31.99	4	2	0	High-quality	100	AAI-based (medium-confidence)	0	1	contig >1.5x longer than expected genome length	1	25	280	77.84
ZHr1-k141_29929	Unclassified Virus	1840	3.26482	31.2	44.35	42.66	2	2	0	High-quality	100	AAI-based (medium-confidence)	0	1		1	50	212	66.14
ZHr1-k141_24830	Unclassified Virus	2364	3.37365	28.95	73.9	44.16	3	2	0	High-quality	99.58	HMM-based (lower-bound)	0	1		2	66.67	470	136.06
ZHr1-k141_20761	Circoviridae	2486	3.3955	29.6	20.33	44.89	4	3	0	High-quality	94.15	HMM-based (lower-bound)	0	1		1	25	160	47.36
ZHr1-k141_16441	Unknown	2376	3.37585	25	37.99	48.65	3	3	0	High-quality	98.67	AAI-based (medium-confidence)	0	1		1	33.33	264	66
ZHr1-k141_1623	Circoviridae	3730	3.57171	24.5	30.69	49.25	5	4	0	High-quality	99.37	HMM-based (lower-bound)	0	1		1	20	318	77.91
ZHr1-k141_12572	Unclassified Virus	1632	3.21272	40.3	46.67	48.53	3	2	0	Complete	100	DTR (high-confidence)	0	1.1		1	33.33	217	87.45
ZHr1-k141_12352	Unclassified Virus	1744	3.24155	39.6	50.77	43.23	2	2	0	Complete	100	DTR (high-confidence)	0	1.1		1	50	232	91.87
ZHr1-k141_12138	Unclassified Virus	1754	3.24403	35.1	53.35	52.74	2	2	0	High-quality	100	AAI-based (high-confidence)	0	1		1	50	239	83.89
ZHr1-k141_11417	Unclassified Virus	4039	3.60627	31.2	25.29	45.26	6	3	0	High-quality	100	HMM-based (lower-bound)	0	1		1	16.67	280	87.36
ZHr1-k141_11012	Unclassified Virus	1879	3.27393	28.3	49.53	48.7	3	1	0	Complete	100	DTR (high-confidence)	0	1.1		1	33.33	263	74.43
ZHr1-k141_10809	Unclassified Virus	1850	3.26717	52.8	60.7	50.49	3	1	0	High-quality	100	AAI-based (medium-confidence)	0	1		1	33.33	207	109.3
ZHr1-k141_10472	Unclassified Virus	3196	3.50461	0	0	41.55	6	2	0	Complete	100	DTR (high-confidence)	0	1
ZHr1-k141_10247	Circoviridae	2330	3.36736	26.1	49.68	51.37	2	1	0	High-quality	98.15	HMM-based (lower-bound)	0	1.05		1	50	234	61.07
ZHr1-k141_10240	Unclassified Virus	2046	3.31091	27.4	38.83	45.5	3	1	0	High-quality	100	AAI-based (medium-confidence)	0	1		1	33.33	233	63.84
ZHd3-k141_67632	Circoviridae	2287	3.35927	24.8	34.84	52.91	4	1	0	High-quality	100	AAI-based (medium-confidence)	0	1		1	25	201	49.85
ZHd3-k141_54414	Unknown	2076	3.31723	33	27.19	39.26	4	2	0	High-quality	96.9	HMM-based (lower-bound)	0	1		1	25	124	40.92
ZHd3-k141_22150	Unclassified Virus	2141	3.33062	28.8	27.82	46.75	6	0	0	High-quality	100	AAI-based (medium-confidence)	0	1	no viral genes detected	1	16.67	170	48.96
ZHd3-k141_13721	Unclassified Virus	2751	3.43949	34.4	15.93	45.26	3	2	0	Complete	100	DTR (medium-confidence)	0	1.05		1	33.33	104	35.78
ZHd2-k141_97981	Unclassified Virus	3029	3.4813	25.1	67.34	42.49	4	1	0	High-quality	92.66	HMM-based (lower-bound)	0	1		1	25	637	159.89
ZHd2-k141_93243	Circoviridae	5755	3.76005	42.2	5.88	43.08	7	1	0	High-quality	100	HMM-based (lower-bound)	0	1		1	14.29	92	38.82
ZHd2-k141_88386	Circoviridae	2128	3.32797	25.4	46.29	35.57	3	2	0	High-quality	100	AAI-based (medium-confidence)	0	1		1	33.33	231	58.67
ZHd2-k141_69012	Unclassified Virus	1708	3.23249	26.2	76.44	36.42	3	1	0	High-quality	93.32	AAI-based (high-confidence)	0	1		1	33.33	279	73.1
ZHd2-k141_66036	Unclassified Virus	2224	3.34713	26.7	47.72	46.67	3	1	0	Complete	100	DTR (high-confidence)	0	1.1		1	33.33	293	78.23
ZHd2-k141_44632	Circoviridae	2209	3.3442	30.6	33.33	37.44	3	2	0	High-quality	100	AAI-based (medium-confidence)	0	1		1	33.33	152	46.51
ZHd2-k141_40964	Unclassified Virus	2308	3.36324	26.8	53.68	42.46	3	0	0	High-quality	90.96	AAI-based (medium-confidence)	0	1	no viral genes detected	1	33.33	328	87.9
ZHd2-k141_38958	Unclassified Virus	2141	3.33062	27.5	53.97	41.66	2	0	0	High-quality	100	AAI-based (medium-confidence)	0	1	no viral genes detected	1	50	299	82.22
ZHd2-k141_29834	Unclassified Virus	4937	3.69346	28.7	14.76	35.99	7	1	0	High-quality	100	HMM-based (lower-bound)	0	1		1	14.29	182	52.23
ZHd2-k141_24353	Circoviridae	1989	3.29863	46.6	49.71	43.99	3	0	0	Complete	100	DTR (high-confidence)	0	1.1	no viral genes detected	1	33.33	85	39.61
ZHd2-k141_179060	Unclassified Virus	3017	3.47958	34.1	10.4	39.28	8	0	0	Complete	100	DTR (high-confidence)	0	1	no viral genes detected	1	12.5	94	32.05
ZHd2-k141_177542	Unclassified Virus	3019	3.47986	22.9	39.89	44.85	2	1	0	Complete	100	DTR (high-confidence)	0	1		1	50	302	69.16
ZHd2-k141_171325	Unknown	1837	3.26411	25.7	29.92	36.74	3	2	0	Complete	100	DTR (medium-confidence)	0	1.1		1	33.33	155	39.84
ZHd2-k141_165370	Unclassified Virus	1898	3.2783	26.8	52.55	37.67	3	2	0	Complete	100	DTR (high-confidence)	0	1.1		1	33.33	278	74.5
ZHd2-k141_144177	Unknown	2070	3.31597	32.1	38.23	48.55	3	1	0	High-quality	100	HMM-based (lower-bound)	0	1		1	33.33	177	56.82
ZHd2-k141_139156	Unclassified Virus	1635	3.21352	41.5	20.81	38.9	4	0	0	High-quality	90.74	AAI-based (high-confidence)	0	1	no viral genes detected	1	25	82	34.03
ZHd2-k141_135936	Unclassified Virus	1640	3.21484	40.5	51.68	46.83	2	0	0	High-quality	90.39	AAI-based (medium-confidence)	0	1	no viral genes detected	1	50	169	68.44
ZHd2-k141_135557	Circoviridae	2480	3.39445	24.1	44.64	43.31	3	3	0	High-quality	100	AAI-based (medium-confidence)	0	1		1	33.33	275	66.28
ZHd2-k141_13020	Circoviridae	1922	3.28375	40	59.11	43.91	2	0	0	High-quality	100	AAI-based (high-confidence)	0	1.05	no viral genes detected	1	50	120	48
ZHd2-k141_122746	Unclassified Virus	1722	3.23603	38.3	49.9	30.2	4	3	0	Complete	100	DTR (high-confidence)	0	1		1	25	246	94.22
ZHd2-k141_122687	Unclassified Virus	1987	3.2982	27.5	47.11	28.84	5	2	0	High-quality	96.13	HMM-based (lower-bound)	0	1		1	20	236	64.9
ZHd2-k141_117605	Microviridae	4825	3.6835	29.1	9.08	40	7	3	0	Complete	100	DTR (high-confidence)	0	1		1	14.29	133	38.7
ZHd2-k141_10164	Unclassified Virus	3101	3.4915	24.6	49.85	31.96	5	1	0	High-quality	100	AAI-based (high-confidence)	0	1		1	20	341	83.89
ZHd1-k141_99863	Circoviridae	4662	3.66857	57.6	6.37	41.68	4	2	0	High-quality	100	AAI-based (medium-confidence)	0	1		1	25	76	43.78
ZHd1-k141_99862	Unclassified Virus	2770	3.44248	24.6	37.97	38.48	5	2	0	High-quality	97.97	HMM-based (lower-bound)	0	1		1	20	295	72.57
ZHd1-k141_99723	Unclassified Virus	2093	3.32077	24.8	45.15	43.48	3	1	0	High-quality	90.85	AAI-based (medium-confidence)	0	1		1	33.33	270	66.96
ZHd1-k141_99644	Unclassified Virus	1879	3.27393	24.3	41.81	37.41	3	2	0	Complete	100	DTR (high-confidence)	0	1.1		1	33.33	235	57.1
ZHd1-k141_97604	Circoviridae	3668	3.56443	24	56.79	61.4	3	2	0	Complete	100	DTR (high-confidence)	0	1	contig >1.5x longer than expected genome length	1	33.33	418	100.32
ZHd1-k141_9737	Unclassified Virus	2143	3.33102	28.6	39.29	42	3	3	0	Complete	100	DTR (high-confidence)	0	1.1		1	33.33	222	63.49
ZHd1-k141_960	Unclassified Virus	2238	3.34986	24	47.4	43.97	3	1	0	Complete	100	DTR (high-confidence)	0	1.1		1	33.33	283	67.92
ZHd1-k141_94949	Microviridae	4638	3.66633	37.9	7.89	43.77	7	5	0	High-quality	100	AAI-based (high-confidence)	0	1		1	14.29	107	40.55
ZHd1-k141_94657	Circoviridae	2166	3.33566	26.9	46.81	37.63	3	2	0	High-quality	97.03	HMM-based (lower-bound)	0	1		1	33.33	242	65.1
ZHd1-k141_94067	Circoviridae	2483	3.39498	26	22.83	49.54	6	2	0	High-quality	97.82	AAI-based (medium-confidence)	0	1		1	16.67	171	44.46
ZHd1-k141_93670	Circoviridae	2911	3.46404	30.8	30.3	46.44	5	3	0	High-quality	100	AAI-based (medium-confidence)	0	1	contig >1.5x longer than expected genome length	1	20	153	47.12
ZHd1-k141_93155	Unclassified Virus	2330	3.36736	40.6	18.22	41.03	7	0	0	High-quality	100	AAI-based (medium-confidence)	0	1	no viral genes detected	1	14.29	121	49.13
ZHd1-k141_92790	Unknown	4466	3.64992	33.3	8.31	54.75	6	5	0	Complete	100	DTR (high-confidence)	0	1		1	16.67	113	37.63
ZHd1-k141_91666	Microviridae	4450	3.64836	24.5	19.95	44.72	6	4	0	High-quality	100	AAI-based (medium-confidence)	0	1		1	16.67	239	58.55
ZHd1-k141_91390	Circoviridae	2421	3.38399	23.4	43.03	41.31	3	1	0	High-quality	100	AAI-based (medium-confidence)	0	1		1	33.33	284	66.46
ZHd1-k141_88101	Unclassified Virus	1942	3.28825	23.2	100	49.23	1	1	0	Complete	100	DTR (medium-confidence)	0	1.1		1	100	273	63.34
ZHd1-k141_8632	Unclassified Virus	4780	3.67943	25.9	21.96	51.23	6	2	0	High-quality	100	AAI-based (medium-confidence)	0	1		1	16.67	305	79
ZHd1-k141_86158	Unclassified Virus	1961	3.29248	24.7	63.07	53.34	3	2	0	Complete	100	DTR (medium-confidence)	0	1.1		1	33.33	333	82.25
ZHd1-k141_84819	Unknown	3851	3.58557	51.4	39.94	42.02	4	2	0	High-quality	100	AAI-based (high-confidence)	0	1		1	25	395	203.03
ZHd1-k141_84471	Unclassified Virus	2298	3.36135	31.8	34.1	31.85	3	2	0	High-quality	100	AAI-based (high-confidence)	0	1.05		1	33.33	207	65.83
ZHd1-k141_8274	Unclassified Virus	2214	3.34518	26.6	52.21	37.76	3	0	0	High-quality	100	AAI-based (medium-confidence)	0	1	no viral genes detected	1	33.33	343	91.24
ZHd1-k141_81485	Unclassified Virus	1945	3.28892	0	0	35.53	4	1	0	High-quality	94.1	HMM-based (lower-bound)	0	1
ZHd1-k141_81461	Unclassified Virus	2406	3.3813	52.2	10.19	51.66	6	0	0	High-quality	100	AAI-based (high-confidence)	0	1	no viral genes detected	1	16.67	64	33.41
ZHd1-k141_80326	Circoviridae	2630	3.41996	25	52.44	32.43	2	2	0	High-quality	100	AAI-based (medium-confidence)	0	1.05		1	50	279	69.75
ZHd1-k141_79249	Circoviridae	1940	3.2878	24.8	49.09	51.19	3	1	0	Complete	100	DTR (medium-confidence)	0	1.1		1	33.33	242	60.02
ZHd1-k141_78786	Unclassified Virus	1869	3.27161	34.5	48.61	30.66	3	2	0	High-quality	100	AAI-based (medium-confidence)	0	1		1	33.33	228	78.66
ZHd1-k141_77642	Unclassified Virus	2218	3.34596	37.7	14.09	48.06	3	2	0	High-quality	91.19	AAI-based (high-confidence)	0	1		1	33.33	95	35.82
ZHd1-k141_75458	Microviridae	4455	3.64885	25	23.17	38.2	6	3	0	Complete	100	DTR (high-confidence)	0	1		1	16.67	292	73
ZHd1-k141_73622	Microviridae	4274	3.63083	50.7	6.11	40.06	6	4	0	High-quality	97.01	AAI-based (medium-confidence)	0	1		1	16.67	75	38.02
ZHd1-k141_73044	Circoviridae	5866	3.76834	23.7	28.41	48.26	3	1	0	High-quality	100	HMM-based (lower-bound)	0	1		1	33.33	369	87.45
ZHd1-k141_72887	Unclassified Virus	4391	3.64256	33.7	8.76	53.5	6	6	0	Complete	100	DTR (high-confidence)	0	1		1	16.67	120	40.44
ZHd1-k141_72568	Unclassified Virus	3162	3.49996	24	31.05	46.58	5	1	0	High-quality	100	AAI-based (high-confidence)	0	1		1	20	286	68.64
ZHd1-k141_7216	Unclassified Virus	2020	3.30535	39.2	13.78	48.91	3	2	0	Complete	100	DTR (high-confidence)	0	1.1		1	33.33	89	34.89
ZHd1-k141_72066	Unclassified Virus	1869	3.27161	35	36.58	42.43	3	2	0	High-quality	90.73	AAI-based (medium-confidence)	0	1		1	33.33	184	64.4
ZHd1-k141_69367	Unclassified Virus	2031	3.30771	24.4	60.34	45.35	3	1	0	High-quality	93.24	AAI-based (medium-confidence)	0	1.05		1	33.33	359	87.6
ZHd1-k141_69228	Microviridae	4851	3.68583	25.4	22.42	50.77	6	2	0	High-quality	100	AAI-based (medium-confidence)	0	1		1	16.67	304	77.22
ZHd1-k141_6866	Circoviridae	1768	3.24748	27.1	45.47	31.05	3	1	0	Complete	100	DTR (high-confidence)	0	1.1		1	33.33	226	61.25
ZHd1-k141_66299	Microviridae	4752	3.67688	33	7.73	41.12	6	6	0	Complete	100	DTR (high-confidence)	0	1		1	16.67	115	37.95
ZHd1-k141_6518	Parvoviridae	5780	3.76193	27.3	32.04	36.83	3	2	0	High-quality	96.04	HMM-based (lower-bound)	0	1		1	33.33	568	155.06
ZHd1-k141_6495	Unclassified Virus	2262	3.35449	27.4	61.1	39.74	2	1	0	Complete	100	DTR (high-confidence)	0	1.1		1	50	311	85.21
ZHd1-k141_6425	Unclassified Virus	2388	3.37803	25.9	67.35	33.63	2	0	0	Complete	100	DTR (high-confidence)	0	1.1	no viral genes detected	1	50	359	92.98
ZHd1-k141_63659	Unclassified Virus	1857	3.26881	27.5	42.07	45.61	3	1	0	Complete	100	DTR (medium-confidence)	0	1.1		1	33.33	228	62.7
ZHd1-k141_6264	Unclassified Virus	2238	3.34986	27.2	40.9	37.53	3	0	0	Complete	100	DTR (high-confidence)	0	1.1	no viral genes detected	1	33.33	254	69.09
ZHd1-k141_62346	Unclassified Virus	2329	3.36717	24.8	49.68	47.36	2	2	0	High-quality	98.11	HMM-based (lower-bound)	0	1		1	50	232	57.54
ZHd1-k141_59775	Parvoviridae	5350	3.72835	25.2	38.41	38.37	4	2	0	High-quality	92.01	AAI-based (medium-confidence)	0	1		1	25	560	141.12
ZHd1-k141_595430	Unclassified Virus	1866	3.27091	36.7	23.67	27.81	3	2	0	Complete	100	DTR (high-confidence)	0	1.1		1	33.33	120	44.04
ZHd1-k141_592397	Unclassified Virus	1877	3.27346	46.5	35.33	42.3	4	0	0	Complete	100	DTR (high-confidence)	0	1.1	no viral genes detected	1	25	171	79.52
ZHd1-k141_585008	Circoviridae	2037	3.30899	25.6	27.05	39.72	4	2	0	Complete	100	DTR (high-confidence)	0	1.1		1	25	155	39.68
ZHd1-k141_584318	Circoviridae	1750	3.24304	26.9	50.32	35.66	3	1	0	Complete	100	DTR (high-confidence)	0	1.1		1	33.33	235	63.22
ZHd1-k141_583061	Unknown	2053	3.31239	0	0	38.19	3	1	0	Complete	100	DTR (high-confidence)	0	1.1
ZHd1-k141_583020	Circoviridae	1833	3.26316	40.7	16.74	37.1	3	2	0	Complete	100	DTR (medium-confidence)	0	1.1		1	33.33	81	32.97
ZHd1-k141_581979	Unclassified Virus	1603	3.20493	24.9	49.09	45.48	3	1	0	Complete	100	DTR (high-confidence)	0	1.1		1	33.33	216	53.78
ZHd1-k141_581515	Unclassified Virus	2612	3.41697	20	34.92	38.55	4	1	0	Complete	100	DTR (high-confidence)	0	1.05		1	25	286	57.2
ZHd1-k141_580510	Unclassified Virus	1626	3.21112	37.6	44.09	41.57	3	1	0	Complete	100	DTR (high-confidence)	0	1.1		1	33.33	224	84.22
ZHd1-k141_579630	Unclassified Virus	2197	3.34183	38.5	11.81	35.05	3	2	0	Complete	100	DTR (high-confidence)	0	1.1		1	33.33	68	26.18
ZHd1-k141_579288	Unclassified Virus	2085	3.31911	24.7	43.9	29.3	3	1	0	Complete	100	DTR (medium-confidence)	0	1.1		1	33.33	234	57.8
ZHd1-k141_579263	Circoviridae	1638	3.21431	26.4	43.78	31.99	3	1	0	Complete	100	DTR (high-confidence)	0	1.1		1	33.33	190	50.16
ZHd1-k141_578772	Unclassified Virus	2122	3.32675	0	0	43.73	3	1	0	Complete	100	DTR (high-confidence)	0	1.1
ZHd1-k141_578616	Unclassified Virus	1735	3.2393	44.5	51.58	37.12	2	1	0	Complete	100	DTR (high-confidence)	0	1.1		1	50	229	101.91
ZHd1-k141_578447	Unclassified Virus	2546	3.40586	21.9	50.69	42.18	2	2	0	Complete	100	DTR (high-confidence)	0	1.1		1	50	368	80.59
ZHd1-k141_578437	Unclassified Virus	2066	3.31513	43.3	56.81	36.11	3	1	0	Complete	100	DTR (medium-confidence)	0	1.1		1	33.33	317	137.26
ZHd1-k141_578421	Circoviridae	1618	3.20898	29.7	49.68	36.09	3	1	0	Complete	100	DTR (high-confidence)	0	1.1		1	33.33	235	69.8
ZHd1-k141_577589	Unclassified Virus	1950	3.29003	24.7	46.93	40	3	2	0	Complete	100	DTR (medium-confidence)	0	1.1		1	33.33	275	67.92
ZHd1-k141_577229	Circoviridae	2139	3.33021	38.86	89.14	45.16	3	2	0	Complete	100	DTR (high-confidence)	0	1.1		2	66.67	468	181.86
ZHd1-k141_576834	Unclassified Virus	1683	3.22608	25.8	43.35	39.51	3	2	0	Complete	100	DTR (high-confidence)	0	1.1		1	33.33	215	55.47
ZHd1-k141_576512	Unclassified Virus	1995	3.29994	44.2	52.38	35.79	3	0	0	Complete	100	DTR (high-confidence)	0	1.1	no viral genes detected	1	33.33	330	145.86
ZHd1-k141_576235	Unclassified Virus	2331	3.36754	23.2	46.58	41.1	3	3	0	Complete	100	DTR (high-confidence)	0	1.1		1	33.33	347	80.5
ZHd1-k141_575819	Unclassified Virus	1771	3.24822	31	20.11	34.11	3	3	0	Complete	100	DTR (medium-confidence)	0	1.1		1	33.33	109	33.79
ZHd1-k141_575324	Unclassified Virus	2188	3.34005	23.4	35.57	43.51	4	3	0	Complete	100	DTR (high-confidence)	0	1.1		1	25	233	54.52
ZHd1-k141_575323	Circoviridae	1743	3.2413	27.6	57.92	34.71	2	1	0	Complete	100	DTR (medium-confidence)	0	1.1		1	50	307	84.73
ZHd1-k141_575006	Unclassified Virus	1964	3.29314	41.9	30.13	51.22	3	1	0	Complete	100	DTR (high-confidence)	0	1.1		1	33.33	163	68.3
ZHd1-k141_574588	Unknown	2290	3.35984	69.8	34.92	49.74	3	1	0	Complete	100	DTR (high-confidence)	0	1.1		1	33.33	227	158.45
ZHd1-k141_574522	Unclassified Virus	2695	3.43056	24.8	36.74	46.83	3	3	0	Complete	100	DTR (high-confidence)	0	1.05		1	33.33	302	74.9
ZHd1-k141_574371	Unclassified Virus	2119	3.32613	24.9	50.68	33.55	3	2	0	Complete	100	DTR (high-confidence)	0	1.1		1	33.33	297	73.95
ZHd1-k141_574138	Unclassified Virus	2128	3.32797	34.5	41.25	32	3	1	0	Complete	100	DTR (high-confidence)	0	1.1		1	33.33	217	74.86
ZHd1-k141_574122	Circoviridae	2083	3.31869	28.7	54.31	41.67	3	0	0	Complete	100	DTR (high-confidence)	0	1.1	no viral genes detected	1	33.33	321	92.13
ZHd1-k141_574116	Unclassified Virus	1877	3.27346	0	0	38.57	3	1	0	Complete	100	DTR (high-confidence)	0	1.1
ZHd1-k141_573959	Circoviridae	1870	3.27184	37.4	46.9	35.13	3	0	0	Complete	100	DTR (high-confidence)	0	1.1	no viral genes detected	1	33.33	242	90.51
ZHd1-k141_573875	Circoviridae	2093	3.32077	24.4	47.12	44.62	3	1	0	Complete	100	DTR (medium-confidence)	0	1.1		1	33.33	278	67.83
ZHd1-k141_573436	Unclassified Virus	2138	3.33001	36.2	12.93	43.12	3	3	0	Complete	100	DTR (medium-confidence)	0	1.1		1	33.33	79	28.6
ZHd1-k141_573275	Circoviridae	2234	3.34908	24.6	53.9	45.88	2	2	0	Complete	100	DTR (medium-confidence)	0	1.1		1	50	290	71.34
ZHd1-k141_573212	Unclassified Virus	2322	3.36586	31.1	16.76	41.04	4	3	0	Complete	100	DTR (high-confidence)	0	1.1		1	25	122	37.94
ZHd1-k141_573207	Unclassified Virus	1937	3.28713	23.9	53.74	33.4	3	1	0	Complete	100	DTR (high-confidence)	0	1.1		1	33.33	316	75.52
ZHd1-k141_573045	Unclassified Virus	2085	3.31911	0	0	44.99	3	1	0	Complete	100	DTR (medium-confidence)	0	1.1
ZHd1-k141_57287	Unclassified Virus	2355	3.37199	22.7	47	50.79	3	1	0	Complete	100	DTR (high-confidence)	0	1.1		1	33.33	305	69.23
ZHd1-k141_572849	Unclassified Virus	2003	3.30168	42.4	12.41	42.19	3	3	0	Complete	100	DTR (high-confidence)	0	1.1		1	33.33	70	29.68
ZHd1-k141_572773	Microviridae	4406	3.64404	31.3	9.64	37.86	6	6	0	Complete	100	DTR (high-confidence)	0	1		1	16.67	130	40.69
ZHd1-k141_572644	Unclassified Virus	1966	3.29358	35.4	55.75	46.29	3	0	0	Complete	100	DTR (medium-confidence)	0	1.1	no viral genes detected	1	33.33	97	34.34
ZHd1-k141_572637	Unclassified Virus	1886	3.27554	0	0	42.05	3	2	0	Complete	100	DTR (medium-confidence)	0	1.1
ZHd1-k141_572518	Unclassified Virus	1860	3.26951	26.2	31.95	43.71	3	2	0	Complete	100	DTR (medium-confidence)	0	1.1		1	33.33	177	46.37
ZHd1-k141_572468	Unclassified Virus	1785	3.25164	37.4	50.77	50.48	2	1	0	Complete	100	DTR (high-confidence)	0	1.1		1	50	230	86.02
ZHd1-k141_572365	Unclassified Virus	2048	3.31133	22.8	51.11	36.87	3	2	0	Complete	100	DTR (high-confidence)	0	1.1		1	33.33	300	68.4
ZHd1-k141_572101	Unclassified Virus	2025	3.30643	25.2	92.86	24.74	2	1	0	Complete	100	DTR (medium-confidence)	0	1.1		1	50	416	104.83
ZHd1-k141_571487	Unclassified Virus	1979	3.29645	38	42.69	36.79	3	1	0	Complete	100	DTR (high-confidence)	0	1.1		1	33.33	216	82.08
ZHd1-k141_571456	Unclassified Virus	2186	3.33965	23.7	54.78	35.5	2	2	0	Complete	100	DTR (high-confidence)	0	1.1		1	50	298	70.63
ZHd1-k141_571448	Unknown	2010	3.3032	44.8	47.23	49.05	3	1	0	Complete	100	DTR (high-confidence)	0	1.1		1	33.33	307	137.54
ZHd1-k141_570908	Unclassified Virus	2291	3.36003	50.6	26.41	47.1	5	0	0	Complete	100	DTR (high-confidence)	0	1.1	no viral genes detected	1	20	183	92.6
ZHd1-k141_570781	Circoviridae	1788	3.25237	27	44.89	29.36	3	1	0	Complete	100	DTR (high-confidence)	0	1.1		1	33.33	224	60.48
ZHd1-k141_570709	Circoviridae	1822	3.26055	28.9	28.73	38.97	3	2	0	Complete	100	DTR (high-confidence)	0	1.1		1	33.33	154	44.51
ZHd1-k141_570699	Unclassified Virus	1921	3.28353	47.6	40.96	41.07	2	1	0	Complete	100	DTR (high-confidence)	0	1.1		1	50	204	97.1
ZHd1-k141_570638	Unclassified Virus	1525	3.18327	26.3	54.11	38.23	3	1	0	Complete	100	DTR (high-confidence)	0	1.1		1	33.33	224	58.91
ZHd1-k141_570410	Unclassified Virus	2172	3.33686	22.4	54.63	48.62	3	1	0	Complete	100	DTR (high-confidence)	0	1.1		1	33.33	360	80.64
ZHd1-k141_570321	Microviridae	4505	3.65369	34.6	6.85	39.76	6	4	0	Complete	100	DTR (high-confidence)	0	1		1	16.67	91	31.49
ZHd1-k141_570198	Microviridae	4495	3.65273	23.4	21.39	43.03	5	4	0	Complete	100	DTR (high-confidence)	0	1		1	20	292	68.33
ZHd1-k141_570158	Unclassified Virus	2112	3.32469	26.2	39.57	35.04	3	0	0	Complete	100	DTR (high-confidence)	0	1.1	no viral genes detected	1	33.33	237	62.09
ZHd1-k141_570138	Circoviridae	2134	3.32919	23.3	49.75	47.99	2	1	0	Complete	100	DTR (medium-confidence)	0	1.1		1	50	295	68.73
ZHd1-k141_570032	Unclassified Virus	1765	3.24674	34.5	31.34	44.42	4	2	0	Complete	100	DTR (high-confidence)	0	1.1		1	25	110	37.95
ZHd1-k141_569795	Unclassified Virus	2053	3.31239	23.8	51.19	50.85	3	1	0	Complete	100	DTR (high-confidence)	0	1.1		1	33.33	301	71.64
ZHd1-k141_569715	Circoviridae	2433	3.38614	27.9	22.03	41.96	4	2	0	Complete	100	DTR (high-confidence)	0	1.1		1	25	180	50.22
ZHd1-k141_569692	Circoviridae	1800	3.25527	48.9	19.82	37.83	3	3	0	Complete	100	DTR (medium-confidence)	0	1.1		1	33.33	109	53.3
ZHd1-k141_569511	Circoviridae	1923	3.28398	31.3	53.07	46.18	3	1	0	Complete	100	DTR (high-confidence)	0	1.1		1	33.33	285	89.2
ZHd1-k141_569444	Circoviridae	1939	3.28758	20.7	46.29	41.72	3	2	0	Complete	100	DTR (medium-confidence)	0	1.1		1	33.33	281	58.17
ZHd1-k141_569288	Unclassified Virus	1992	3.29929	24.7	47.64	42.92	3	2	0	Complete	100	DTR (medium-confidence)	0	1.1		1	33.33	273	67.43
ZHd1-k141_569234	Unclassified Virus	2574	3.41061	24.2	37.01	39.16	3	2	0	Complete	100	DTR (high-confidence)	0	1.05		1	33.33	245	59.29
ZHd1-k141_56912	Unknown	3490	3.54283	25	40.92	50.63	5	2	0	Complete	100	DTR (high-confidence)	0	1		1	20	426	106.5
ZHd1-k141_568925	Unclassified Virus	1898	3.2783	30.1	25.76	43.47	3	2	0	Complete	100	DTR (high-confidence)	0	1.1		1	33.33	144	43.34
ZHd1-k141_568850	Unclassified Virus	2278	3.35755	51.3	18.18	50.18	4	0	0	Complete	100	DTR (high-confidence)	0	1.1	no viral genes detected	1	25	118	60.53
ZHd1-k141_568817	Unclassified Virus	2224	3.34713	34.5	39.96	34.58	2	0	0	Complete	100	DTR (high-confidence)	0	1.1	no viral genes detected	1	50	219	75.56
ZHd1-k141_568809	Circoviridae	1946	3.28914	22.6	56.35	48.46	3	3	0	Complete	100	DTR (medium-confidence)	0	1.1		1	33.33	306	69.16
ZHd1-k141_568752	Unclassified Virus	2270	3.35603	25.1	45.57	42.03	3	1	0	Complete	100	DTR (high-confidence)	0	1.1		1	33.33	314	78.81
ZHd1-k141_568608	Unclassified Virus	2052	3.31218	35.1	45.45	44.59	3	1	0	Complete	100	DTR (high-confidence)	0	1.1		1	33.33	265	93.02
ZHd1-k141_568349	Unclassified Virus	2258	3.35372	25.1	41.93	48.45	3	1	0	Complete	100	DTR (high-confidence)	0	1.1		1	33.33	283	71.03
ZHd1-k141_568244	Unclassified Virus	1967	3.2938	27.1	45.33	48.7	3	3	0	Complete	100	DTR (high-confidence)	0	1.1		1	33.33	267	72.36
ZHd1-k141_568159	Unclassified Virus	1929	3.28533	54.1	40.88	43.08	3	0	0	Complete	100	DTR (high-confidence)	0	1.1	no viral genes detected	1	33.33	74	40.03
ZHd1-k141_567950	Circoviridae	2487	3.39568	23.1	45.12	46.4	3	1	0	Complete	100	DTR (high-confidence)	0	1.1		1	33.33	342	79
ZHd1-k141_567517	Unclassified Virus	1963	3.29292	27.8	20.03	48.14	3	2	0	Complete	100	DTR (high-confidence)	0	1.1		1	33.33	121	33.64
ZHd1-k141_567495	Unknown	2783	3.44451	29.9	61.17	50.56	2	2	0	Complete	100	DTR (high-confidence)	0	1.05		1	50	408	121.99
ZHd1-k141_567005	Circoviridae	2148	3.33203	24.4	47.78	49.63	3	1	0	Complete	100	DTR (high-confidence)	0	1.1		1	33.33	312	76.13
ZHd1-k141_566904	Circoviridae	1738	3.24005	43.2	40.61	34.23	3	0	0	Complete	100	DTR (high-confidence)	0	1.1	no viral genes detected	1	33.33	186	80.35
ZHd1-k141_566885	Unclassified Virus	2912	3.46419	21.8	32.86	54.77	4	1	0	Complete	100	DTR (high-confidence)	0	1		1	25	254	55.37
ZHd1-k141_56669	Circoviridae	1892	3.27692	28.9	43.48	31.45	3	1	0	High-quality	91.53	HMM-based (lower-bound)	0	1.05		1	33.33	210	60.69
ZHd1-k141_566576	Unclassified Virus	1994	3.29973	24.7	49.46	49.95	4	2	0	Complete	100	DTR (high-confidence)	0	1.1		1	25	320	79.04
ZHd1-k141_566502	Unclassified Virus	2669	3.42635	23.4	41.92	44.47	2	1	0	Complete	100	DTR (high-confidence)	0	1.05		1	50	288	67.39
ZHd1-k141_566500	Circoviridae	1996	3.30016	23.2	44.53	42.43	3	1	0	Complete	100	DTR (medium-confidence)	0	1.1		1	33.33	244	56.61
ZHd1-k141_566465	Unclassified Virus	1848	3.2667	23	51.43	47.35	3	1	0	Complete	100	DTR (medium-confidence)	0	1.1		1	33.33	269	61.87
ZHd1-k141_566393	Unclassified Virus	2554	3.40722	42.7	35.43	53.64	4	0	0	Complete	100	DTR (high-confidence)	0	1.1	no viral genes detected	1	25	270	115.29
ZHd1-k141_566246	Unclassified Virus	2620	3.4183	26.1	45.95	38.09	4	2	0	Complete	100	DTR (high-confidence)	0	1.1		1	25	318	83
ZHd1-k141_566242	Unclassified Virus	1933	3.28623	27.8	75.26	53.75	2	0	0	Complete	100	DTR (medium-confidence)	0	1.1	no viral genes detected	1	50	295	82.01
ZHd1-k141_566231	Unclassified Virus	2232	3.34869	66.9	20.17	53.27	3	0	0	Complete	100	DTR (high-confidence)	0	1.1	no viral genes detected	1	33.33	119	79.61
ZHd1-k141_566153	Unclassified Virus	2100	3.32222	32.7	16.67	48.62	3	2	0	Complete	100	DTR (high-confidence)	0	1.1		1	33.33	105	34.34
ZHd1-k141_566061	Unclassified Virus	3522	3.54679	32.9	17.92	48.41	7	2	0	Complete	100	DTR (medium-confidence)	0	1		1	14.29	167	54.94
ZHd1-k141_566031	Unclassified Virus	3003	3.47756	24.6	36.96	51.55	3	2	0	Complete	100	DTR (high-confidence)	0	1		1	33.33	292	71.83
ZHd1-k141_565942	Unknown	5525	3.74233	29.4	17.69	52.51	9	2	0	Complete	100	DTR (high-confidence)	0	1		1	11.11	320	94.08
ZHd1-k141_565706	Circoviridae	2082	3.31848	23.5	44.65	35.01	3	2	0	Complete	100	DTR (high-confidence)	0	1.1		1	33.33	267	62.74
ZHd1-k141_565095	Circoviridae	2593	3.4138	32.4	15.83	31.05	5	4	0	High-quality	100	AAI-based (high-confidence)	0	1		1	20	92	29.81
ZHd1-k141_560548	Unclassified Virus	3497	3.5437	28.3	14.65	53.7	7	0	0	High-quality	100	AAI-based (medium-confidence)	0	1	no viral genes detected	1	14.29	156	44.15
ZHd1-k141_560128	Unclassified Virus	3459	3.53895	50	7.48	42.35	7	0	0	Complete	100	DTR (high-confidence)	0	1	no viral genes detected	1	14.29	72	36
ZHd1-k141_56	Unclassified Virus	2158	3.33405	32.8	18.43	35.13	3	3	0	Complete	100	DTR (high-confidence)	0	1.1		1	33.33	113	37.06
ZHd1-k141_558600	Parvoviridae	5547	3.74406	24	36.97	36.27	4	2	0	Complete	100	ITR (high-confidence)	0	1		1	25	610	146.4
ZHd1-k141_55624	Unclassified Virus	2780	3.44404	40.9	9.66	51.76	5	0	0	High-quality	100	AAI-based (medium-confidence)	0	1	no viral genes detected	1	20	59	24.13
ZHd1-k141_555234	Unclassified Virus	2484	3.39515	38.2	9.19	39.01	4	0	0	High-quality	97.11	AAI-based (medium-confidence)	0	1	no viral genes detected	1	25	61	23.3
ZHd1-k141_554360	Unclassified Virus	2482	3.3948	27	40.39	44.52	4	1	0	High-quality	100	AAI-based (medium-confidence)	0	1		1	25	313	84.51
ZHd1-k141_554233	Unclassified Virus	1937	3.28713	41.3	29.09	39.44	2	2	0	High-quality	98.97	AAI-based (medium-confidence)	0	1		1	50	105	43.37
ZHd1-k141_553966	Unclassified Virus	2566	3.40926	0	0	45.13	3	1	0	High-quality	99.47	HMM-based (lower-bound)	0	1
ZHd1-k141_553917	Circoviridae	3203	3.50556	27.8	19.3	31.1	6	4	0	High-quality	98.6	HMM-based (lower-bound)	0	1		1	16.67	166	46.15
ZHd1-k141_553354	Unclassified Virus	1856	3.26858	54.8	9.48	43.7	4	0	0	Complete	100	DTR (high-confidence)	0	1.1	no viral genes detected	1	25	46	25.21
ZHd1-k141_551926	Unclassified Virus	3949	3.59649	54.5	5.9	42.14	9	1	0	High-quality	100	AAI-based (medium-confidence)	0	1	contig >1.5x longer than expected genome length	1	11.11	57	31.07
ZHd1-k141_54968	Unclassified Virus	2571	3.4101	0	0	44.57	3	2	0	High-quality	98.03	HMM-based (lower-bound)	0	1
ZHd1-k141_548149	Unclassified Virus	3076	3.48799	35.6	9.23	38.23	9	0	0	Complete	100	DTR (high-confidence)	0	1	no viral genes detected	1	11.11	86	30.62
ZHd1-k141_547726	Unclassified Virus	2466	3.39199	22.6	36.15	42.3	3	3	0	Complete	100	DTR (high-confidence)	0	1.1		1	33.33	252	56.95
ZHd1-k141_547295	Unclassified Virus	2169	3.33626	28.8	36.06	33.52	3	2	0	High-quality	96.88	AAI-based (medium-confidence)	0	1		1	33.33	225	64.8
ZHd1-k141_547231	Unknown	1821	3.26031	0	0	36.19	3	1	0	Complete	100	DTR (medium-confidence)	0	1.1
ZHd1-k141_542220	Unknown	4687	3.67089	29	14.25	43.5	4	4	0	High-quality	100	AAI-based (medium-confidence)	0	1	contig >1.5x longer than expected genome length	1	25	158	45.82
ZHd1-k141_541778	Unclassified Virus	2057	3.31323	24.7	48.17	35.29	2	1	0	High-quality	95.79	AAI-based (high-confidence)	0	1		1	50	289	71.38
ZHd1-k141_541240	Unclassified Virus	2064	3.31471	52.2	42.88	40.21	3	2	0	Complete	100	DTR (high-confidence)	0	1.1		1	33.33	259	135.2
ZHd1-k141_540486	Unclassified Virus	2784	3.44467	36.4	6.82	39.12	6	1	0	Complete	100	DTR (high-confidence)	0	1.05		1	16.67	55	20.02
ZHd1-k141_540199	Microviridae	4834	3.68431	23.4	20.97	42.2	7	3	0	High-quality	100	AAI-based (medium-confidence)	0	1		1	14.29	268	62.71
ZHd1-k141_540090	Unclassified Virus	2028	3.30707	31.6	40.54	39.3	3	0	0	Complete	100	DTR (high-confidence)	0	1.1	no viral genes detected	1	33.33	240	75.84
ZHd1-k141_536026	Microviridae	4631	3.66567	36.4	8.71	48.59	6	6	0	Complete	100	ITR (high-confidence)	0	1		1	16.67	113	41.13
ZHd1-k141_535835	Unclassified Virus	4564	3.65935	37.7	5.34	46.17	6	6	0	High-quality	98.82	AAI-based (medium-confidence)	0	1		1	16.67	73	27.52
ZHd1-k141_534220	Unclassified Virus	2439	3.38721	0	0	31.73	4	1	0	High-quality	100	HMM-based (lower-bound)	0	1
ZHd1-k141_533860	Unclassified Virus	4748	3.67651	21.7	27.9	50.8	6	2	0	High-quality	100	AAI-based (medium-confidence)	0	1		1	16.67	385	83.55
ZHd1-k141_529738	Unclassified Virus	2349	3.37088	25.3	37.73	46.57	2	2	0	High-quality	100	AAI-based (medium-confidence)	0	1.05		1	50	166	42
ZHd1-k141_529468	Unclassified Virus	2132	3.32879	39.3	13.42	34.71	4	1	0	High-quality	100	AAI-based (medium-confidence)	0	1		1	25	71	27.9
ZHd1-k141_528306	Bacilladnaviridae	5954	3.77481	21.8	27.5	45.4	5	1	0	Complete	100	DTR (high-confidence)	0	1		1	20	380	82.84
ZHd1-k141_527515	Unclassified Virus	2545	3.40569	24	53.43	37.41	2	2	0	Complete	100	DTR (high-confidence)	0	1.1		1	50	296	71.04
ZHd1-k141_527423	Unknown	4471	3.6504	27.1	15.53	41.69	5	4	0	Complete	100	DTR (high-confidence)	0	1		1	20	212	57.45
ZHd1-k141_527421	Unclassified Virus	1581	3.19893	34	39.19	43.77	3	0	0	High-quality	91.68	AAI-based (medium-confidence)	0	1	no viral genes detected	1	33.33	174	59.16
ZHd1-k141_527418	Circoviridae	1808	3.2572	36.4	22.46	45.8	3	3	0	Complete	100	DTR (medium-confidence)	0	1.1		1	33.33	124	45.14
ZHd1-k141_527116	Unclassified Virus	2289	3.35965	23.6	47.36	37.96	2	1	0	High-quality	100	AAI-based (medium-confidence)	0	1		1	50	287	67.73
ZHd1-k141_523502	Unclassified Virus	2064	3.31471	47.5	49.56	37.4	2	1	0	Complete	100	DTR (high-confidence)	0	1.1		1	50	227	107.83
ZHd1-k141_522779	Unclassified Virus	2047	3.31112	48.9	15.56	31.95	3	3	0	Complete	100	DTR (high-confidence)	0	1.1		1	33.33	96	46.94
ZHd1-k141_521546	Unclassified Virus	2275	3.35698	50	9.44	40.75	7	0	0	High-quality	100	AAI-based (medium-confidence)	0	1	no viral genes detected	1	14.29	56	28
ZHd1-k141_521267	Unclassified Virus	2518	3.40106	26.1	39.29	46.74	4	2	0	High-quality	95.36	HMM-based (lower-bound)	0	1		1	25	266	69.43
ZHd1-k141_520849	Microviridae	4652	3.66764	32.9	9.81	50.21	7	5	0	High-quality	100	AAI-based (medium-confidence)	0	1		1	14.29	121	39.81
ZHd1-k141_520387	Circoviridae	2055	3.31281	26.1	39.55	30.9	3	1	0	Complete	100	DTR (medium-confidence)	0	1.1		1	33.33	231	60.29
ZHd1-k141_517754	Unknown	2958	3.471	23.6	35.26	41.14	2	1	0	High-quality	100	AAI-based (medium-confidence)	0	1		1	50	268	63.25
ZHd1-k141_51766	Circoviridae	1614	3.2079	27.6	66.19	29.62	2	1	0	High-quality	97.79	AAI-based (medium-confidence)	0	1		1	50	280	77.28
ZHd1-k141_517476	Circoviridae	2715	3.43377	27.1	58.36	43.76	2	1	0	High-quality	100	AAI-based (medium-confidence)	0	1		1	50	164	44.44
ZHd1-k141_517100	Microviridae	4338	3.63729	35.2	5.45	58.23	6	2	0	Complete	100	DTR (high-confidence)	0	1		1	16.67	70	24.64
ZHd1-k141_514644	Unclassified Virus	3410	3.53275	23.6	35.23	51.64	5	2	0	High-quality	100	AAI-based (medium-confidence)	0	1		1	20	315	74.34
ZHd1-k141_514408	Microviridae	4489	3.65215	31.9	7.93	51.9	10	6	0	High-quality	99.56	AAI-based (medium-confidence)	0	1		1	10	105	33.49
ZHd1-k141_512638	Unclassified Virus	4471	3.6504	46.2	8.73	54.69	6	6	0	Complete	100	DTR (high-confidence)	0	1		1	16.67	111	51.28
ZHd1-k141_511876	Unknown	2051	3.31197	21.5	55.05	37.35	2	2	0	High-quality	96.14	HMM-based (lower-bound)	0	1		1	50	300	64.5
ZHd1-k141_509943	Unclassified Virus	2427	3.38507	37	16.94	40.54	6	0	0	Complete	100	DTR (high-confidence)	0	1.1	no viral genes detected	1	16.67	112	41.44
ZHd1-k141_509513	Microviridae	4182	3.62138	41.5	8.87	56.6	6	5	0	High-quality	94.19	AAI-based (high-confidence)	0	1		1	16.67	113	46.9
ZHd1-k141_50831	Unknown	4183	3.62149	33.3	71.72	39.35	2	1	0	High-quality	100	AAI-based (medium-confidence)	0	1		1	50	799	266.07
ZHd1-k141_508248	Unclassified Virus	2465	3.39182	23.2	44.23	46.17	2	2	0	Complete	100	DTR (medium-confidence)	0	1.1		1	50	299	69.37
ZHd1-k141_505120	Microviridae	4876	3.68806	24.5	19.24	55	8	3	0	High-quality	100	AAI-based (high-confidence)	0	1		1	12.5	287	70.31
ZHd1-k141_503439	Unclassified Virus	3317	3.52075	24.5	26.14	48.39	4	3	0	High-quality	98.96	HMM-based (lower-bound)	0	1		1	25	224	54.88
ZHd1-k141_502627	Unclassified Virus	2405	3.38112	38.8	30.36	41.08	6	0	0	High-quality	100	AAI-based (medium-confidence)	0	1	no viral genes detected	1	16.67	170	65.96
ZHd1-k141_502474	Unclassified Virus	1829	3.26221	25.7	41.9	41.66	3	1	0	Complete	100	DTR (medium-confidence)	0	1.1		1	33.33	220	56.54
ZHd1-k141_502471	Circoviridae	2103	3.32284	41.6	45.89	46.93	2	1	0	High-quality	95.69	AAI-based (medium-confidence)	0	1		1	50	145	60.32
ZHd1-k141_502180	Microviridae	4400	3.64345	22.1	38.51	53.48	6	1	0	High-quality	100	AAI-based (high-confidence)	0	1		1	16.67	486	107.41
ZHd1-k141_502003	Unknown	3007	3.47813	0	0	31.33	3	1	0	High-quality	91.99	HMM-based (lower-bound)	0	1
ZHd1-k141_50193	Unclassified Virus	2225	3.34733	24.2	39.62	43.78	3	2	0	High-quality	97.36	AAI-based (medium-confidence)	0	1		1	33.33	231	55.9
ZHd1-k141_501350	Microviridae	4301	3.63357	19.7	38.03	53.75	6	1	0	Complete	100	DTR (high-confidence)	0	1		1	16.67	480	94.56
ZHd1-k141_501286	Unclassified Virus	2142	3.33082	23.4	48.41	51.12	3	3	0	Complete	100	DTR (high-confidence)	0	1.1		1	33.33	290	67.86
ZHd1-k141_499741	Unclassified Virus	1748	3.24254	48.3	16.6	40.22	4	0	0	Complete	100	DTR (high-confidence)	0	1.1	no viral genes detected	1	25	78	37.67
ZHd1-k141_499155	Unclassified Virus	2602	3.41531	23	27.05	57.92	3	3	0	High-quality	98.07	HMM-based (lower-bound)	0	1		1	33.33	214	49.22
ZHd1-k141_498801	Unclassified Virus	2093	3.32077	23.2	44.12	46.77	2	1	0	High-quality	96.58	AAI-based (high-confidence)	0	1		1	50	270	62.64
ZHd1-k141_4973	Circoviridae	3168	3.50079	24.4	54.42	45.58	2	0	0	High-quality	100	AAI-based (medium-confidence)	0	1	no viral genes detected; contig >1.5x longer than expected genome length	1	50	283	69.05
ZHd1-k141_496249	Unknown	3762	3.57542	0	0	36.39	5	2	0	High-quality	100	HMM-based (lower-bound)	0	1
ZHd1-k141_495638	Unclassified Virus	2152	3.33284	22.3	50.42	44.28	2	2	0	Complete	100	DTR (high-confidence)	0	1.1		1	50	300	66.9
ZHd1-k141_495542	Unclassified Virus	3240	3.51055	28.8	22.38	33.92	5	2	0	High-quality	100	AAI-based (medium-confidence)	0	1	contig >1.5x longer than expected genome length	1	20	205	59.04
ZHd1-k141_486404	Unknown	3985	3.60043	28.4	46.49	48.11	3	1	0	Complete	100	DTR (high-confidence)	0	1	contig >1.5x longer than expected genome length	1	33.33	410	116.44
ZHd1-k141_484275	Parvoviridae	4855	3.68619	41.9	23.02	44.08	5	3	0	Complete	100	ITR (medium-confidence)	0	1		1	20	334	139.95
ZHd1-k141_482022	Microviridae	4048	3.60724	33.3	9.97	55.61	6	6	0	High-quality	90.15	AAI-based (high-confidence)	0	1		1	16.67	124	41.29
ZHd1-k141_480634	Unclassified Virus	5330	3.72673	29.1	7.76	53.08	8	7	0	High-quality	100	AAI-based (medium-confidence)	0	1		1	12.5	122	35.5
ZHd1-k141_47756	Unknown	2349	3.37088	0	0	36.31	6	2	0	High-quality	98.95	HMM-based (lower-bound)	0	1
ZHd1-k141_475385	Unclassified Virus	1852	3.26764	29.7	45.74	47.3	4	1	0	High-quality	99.33	AAI-based (medium-confidence)	0	1		1	25	145	43.06
ZHd1-k141_474715	Unclassified Virus	5221	3.71775	36.4	6.85	43.33	15	0	0	High-quality	100	AAI-based (high-confidence)	0	1	no viral genes detected; contig >1.5x longer than expected genome length	1	6.67	97	35.31
ZHd1-k141_474042	Circoviridae	1909	3.28081	27.7	42.97	32.11	2	1	0	High-quality	95.31	AAI-based (medium-confidence)	0	1.15		1	50	211	58.45
ZHd1-k141_473481	Unclassified Virus	2765	3.4417	45.6	7.05	46	5	0	0	High-quality	100	AAI-based (high-confidence)	0	1	no viral genes detected	1	20	57	25.99
ZHd1-k141_471792	Unclassified Virus	2056	3.31302	61.9	33.84	41.73	2	1	0	High-quality	100	AAI-based (medium-confidence)	0	1		1	50	89	55.09
ZHd1-k141_471186	Unknown	2165	3.33546	0	0	43.33	3	1	0	High-quality	100	HMM-based (lower-bound)	0	1.05
ZHd1-k141_468473	Unclassified Virus	2135	3.3294	23.9	48.16	35.22	3	2	0	Complete	100	DTR (high-confidence)	0	1.1		1	33.33	288	68.83
ZHd1-k141_468213	Unclassified Virus	2088	3.31973	36.5	38.25	47.03	3	1	0	Complete	100	DTR (high-confidence)	0	1.1		1	33.33	192	70.08
ZHd1-k141_466876	Unclassified Virus	2463	3.39146	22.3	35.84	49.49	3	1	0	Complete	100	DTR (high-confidence)	0	1		1	33.33	300	66.9
ZHd1-k141_465974	Unclassified Virus	2447	3.38863	23.8	45.37	35.47	3	1	0	High-quality	100	AAI-based (medium-confidence)	0	1		1	33.33	279	66.4
ZHd1-k141_465362	Unclassified Virus	2041	3.30984	36.8	93.42	43.31	2	0	0	High-quality	100	AAI-based (medium-confidence)	0	1	no viral genes detected	1	50	284	104.51
ZHd1-k141_462894	Circoviridae	3399	3.53135	24.5	43	46.63	3	1	0	High-quality	100	AAI-based (high-confidence)	0	1		1	33.33	304	74.48
ZHd1-k141_462235	Unclassified Virus	2291	3.36003	26.9	30.24	49.24	4	2	0	High-quality	97.22	HMM-based (lower-bound)	0	1		1	25	202	54.34
ZHd1-k141_461799	Unclassified Virus	5162	3.71282	42.5	6.28	50.77	12	0	0	High-quality	100	AAI-based (high-confidence)	0	1	no viral genes detected; contig >1.5x longer than expected genome length	1	8.33	73	31.02
ZHd1-k141_46073	Unknown	1741	3.2408	44.7	40.98	31.42	2	1	0	High-quality	97.45	AAI-based (high-confidence)	0	1		1	50	150	67.05
ZHd1-k141_457905	Unclassified Virus	1917	3.28262	24	76.35	42.04	2	1	0	Complete	100	DTR (medium-confidence)	0	1.1		1	50	368	88.32
ZHd1-k141_457630	Unknown	7151	3.85437	40.3	3.56	46.46	12	2	0	High-quality	92.27	HMM-based (lower-bound)	0	1		1	8.33	71	28.61
ZHd1-k141_456548	Unclassified Virus	1910	3.28103	28.1	59.38	45.24	2	1	0	High-quality	98.15	AAI-based (medium-confidence)	0	1		1	50	285	80.08
ZHd1-k141_455961	Circoviridae	4115	3.61437	25.9	28.14	44.91	6	3	0	High-quality	100	AAI-based (medium-confidence)	0	1		1	16.67	305	79
ZHd1-k141_455769	Microviridae	4633	3.66586	36.4	8.67	44.81	6	4	0	Complete	100	DTR (high-confidence)	0	1		1	16.67	126	45.86
ZHd1-k141_455632	Unclassified Virus	2902	3.4627	42.9	39.69	37.28	4	1	0	High-quality	100	AAI-based (medium-confidence)	0	1		1	25	127	54.48
ZHd1-k141_4553	Circoviridae	2054	3.3126	68.8	100	43.23	1	0	0	High-quality	100	AAI-based (high-confidence)	0	1	no viral genes detected	1	100	53	36.46
ZHd1-k141_454293	Unclassified Virus	1923	3.28398	25.1	66.23	27.46	3	2	0	Complete	100	DTR (high-confidence)	0	1.1		1	33.33	300	75.3
ZHd1-k141_451855	Unclassified Virus	1923	3.28398	37.5	46.49	44.41	3	1	0	High-quality	95.75	AAI-based (medium-confidence)	0	1		1	33.33	139	52.12
ZHd1-k141_451110	Unclassified Virus	3763	3.57553	0	0	43.16	4	1	0	Complete	100	DTR (high-confidence)	0	1
ZHd1-k141_450719	Unclassified Virus	3605	3.55691	29.2	23.97	35.48	8	0	0	High-quality	100	AAI-based (medium-confidence)	0	1	no viral genes detected; contig >1.5x longer than expected genome length	1	12.5	204	59.57
ZHd1-k141_450668	Unclassified Virus	3327	3.52205	24.7	36.26	41.6	5	1	0	High-quality	100	AAI-based (medium-confidence)	0	1		1	20	347	85.71
ZHd1-k141_450268	Unclassified Virus	3660	3.56348	28.2	23.85	36.56	4	0	0	High-quality	100	AAI-based (high-confidence)	0	1	no viral genes detected; contig >1.5x longer than expected genome length	1	25	233	65.71
ZHd1-k141_449420	Unknown	4740	3.67578	36	6.93	52.89	5	5	0	Complete	100	ITR (high-confidence)	0	1		1	20	91	32.76
ZHd1-k141_447696	Unclassified Virus	2239	3.35005	32.6	42.22	43.64	3	2	0	High-quality	100	HMM-based (lower-bound)	0	1		1	33.33	263	85.74
ZHd1-k141_446874	Unclassified Virus	4289	3.63236	30.1	24.58	44.63	5	2	0	High-quality	100	HMM-based (lower-bound)	0	1		1	20	281	84.58
ZHd1-k141_445698	Circoviridae	2151	3.33264	26	61.03	46.58	3	1	0	High-quality	97.9	AAI-based (medium-confidence)	0	1		1	33.33	354	92.04
ZHd1-k141_443635	Unclassified Virus	2537	3.40432	24.9	44.62	40.6	5	1	0	High-quality	98.98	AAI-based (medium-confidence)	0	1		1	20	315	78.44
ZHd1-k141_443025	Microviridae	4671	3.66941	25.3	13.94	52.82	7	4	0	High-quality	97.99	AAI-based (medium-confidence)	0	1		1	14.29	196	49.59
ZHd1-k141_442550	Unclassified Virus	2172	3.33686	25.8	45.5	46.41	4	1	0	Complete	100	DTR (high-confidence)	0	1.1		1	25	298	76.88
ZHd1-k141_437754	Unclassified Virus	2240	3.35025	46.8	8.72	43.84	3	3	0	Complete	100	DTR (high-confidence)	0	1.1		1	33.33	56	26.21
ZHd1-k141_436646	Unknown	4309	3.63438	37.9	17.09	46.67	6	1	0	High-quality	100	HMM-based (lower-bound)	0	1		1	16.67	195	73.91
ZHd1-k141_436046	Unclassified Virus	1706	3.23198	29.9	47.31	42.15	3	1	0	High-quality	100	AAI-based (high-confidence)	0	1		1	33.33	255	76.25
ZHd1-k141_435431	Unclassified Virus	2084	3.3189	25.7	53.89	40.98	3	1	0	Complete	100	DTR (high-confidence)	0	1.1		1	33.33	312	80.18
ZHd1-k141_434710	Unclassified Virus	4808	3.68196	28.1	6.67	53.51	5	5	0	High-quality	100	AAI-based (high-confidence)	0	1		1	20	89	25.01
ZHd1-k141_434522	Microviridae	5065	3.70458	23.7	22.16	44.01	6	4	0	High-quality	100	AAI-based (medium-confidence)	0	1		1	16.67	314	74.42
ZHd1-k141_433737	Circoviridae	2024	3.30621	32.6	47.02	35.57	4	2	0	High-quality	100	AAI-based (medium-confidence)	0	1		1	25	245	79.87
ZHd1-k141_43281	Unclassified Virus	2520	3.4014	27	31.83	39.64	4	3	0	High-quality	97.97	HMM-based (lower-bound)	0	1		1	25	226	61.02
ZHd1-k141_432006	Unclassified Virus	4411	3.64454	25.7	20.8	47.2	5	3	0	Complete	100	DTR (high-confidence)	0	1		1	20	229	58.85
ZHd1-k141_43164	Unclassified Virus	2356	3.37218	24.4	35.4	39.47	4	1	0	High-quality	91.33	HMM-based (lower-bound)	0	1.05		1	25	234	57.1
ZHd1-k141_43139	Unclassified Virus	2106	3.32346	0	0	32.91	4	1	0	High-quality	100	HMM-based (lower-bound)	0	1
ZHd1-k141_429725	Microviridae	4523	3.65543	31	14.06	52.6	8	3	0	High-quality	99.97	AAI-based (medium-confidence)	0	1		1	12.5	193	59.83
ZHd1-k141_42926	Circoviridae	2276	3.35717	23	31.34	40.69	4	2	0	High-quality	100	AAI-based (medium-confidence)	0	1		1	25	215	49.45
ZHd1-k141_429148	Unclassified Virus	2468	3.39235	30	30.83	34.72	4	0	0	High-quality	100	AAI-based (high-confidence)	0	1	no viral genes detected	1	25	209	62.7
ZHd1-k141_429091	Circoviridae	1800	3.25527	43.9	32.57	43.67	3	0	0	Complete	100	DTR (high-confidence)	0	1.1	no viral genes detected	1	33.33	71	31.17
ZHd1-k141_427970	Unclassified Virus	1918	3.28285	26.8	62.14	39.57	2	0	0	Complete	100	DTR (high-confidence)	0	1.1	no viral genes detected	1	50	325	87.1
ZHd1-k141_426725	Unclassified Virus	2187	3.33985	27	51.21	40.24	3	1	0	Complete	100	DTR (high-confidence)	0	1.1		1	33.33	297	80.19
ZHd1-k141_424680	Microviridae	4277	3.63114	27.2	24.73	42.3	7	6	0	High-quality	95.14	AAI-based (high-confidence)	0	1		1	14.29	296	80.51
ZHd1-k141_424259	Parvoviridae	5497	3.74013	35.5	17.5	40.28	4	1	0	High-quality	91.07	HMM-based (lower-bound)	0	1		1	25	282	100.11
ZHd1-k141_423079	Circoviridae	2535	3.40398	40	31.46	48.4	4	1	0	High-quality	98.27	HMM-based (lower-bound)	0	1		1	25	207	82.8
ZHd1-k141_422579	Circoviridae	2719	3.43441	25.1	53.37	43.8	2	2	0	High-quality	100	AAI-based (medium-confidence)	0	1		1	50	269	67.52
ZHd1-k141_420968	Unclassified Virus	3030	3.48144	25	79.88	35.35	3	1	0	High-quality	92.69	HMM-based (lower-bound)	0	1		1	33.33	540	135
ZHd1-k141_418711	Microviridae	4696	3.67173	37.5	4.87	43.78	9	6	0	High-quality	100	AAI-based (high-confidence)	0	1		1	11.11	70	26.25
ZHd1-k141_413495	Microviridae	4605	3.66323	31.5	10.87	51.25	7	3	0	High-quality	100	AAI-based (medium-confidence)	0	1		1	14.29	138	43.47
ZHd1-k141_411423	Unclassified Virus	1229	3.08955	70.6	85.67	46.95	2	1	0	Complete	100	DTR (high-confidence)	0	1.2		1	50	257	181.44
ZHd1-k141_411375	Unclassified Virus	2455	3.39005	43.8	11.58	48.15	6	0	0	Complete	100	DTR (high-confidence)	0	1.1	no viral genes detected	1	16.67	74	32.41
ZHd1-k141_411259	Circoviridae	2275	3.35698	24.3	47.28	46.81	3	1	0	Complete	100	DTR (high-confidence)	0	1.1		1	33.33	295	71.69
ZHd1-k141_411055	Unclassified Virus	2425	3.38471	42.2	13.57	48.78	6	0	0	Complete	100	DTR (high-confidence)	0	1.1	no viral genes detected	1	16.67	79	33.34
ZHd1-k141_408966	Unclassified Virus	5060	3.70415	23.3	19.04	40.24	5	1	0	High-quality	100	HMM-based (lower-bound)	0	1		1	20	295	68.73
ZHd1-k141_408525	Unclassified Virus	2054	3.3126	23.8	52.14	38.61	2	2	0	Complete	100	DTR (high-confidence)	0	1.1		1	50	280	66.64
ZHd1-k141_4067	Unclassified Virus	2524	3.40209	30.6	41.96	37.56	4	0	0	High-quality	100	AAI-based (medium-confidence)	0	1.05	no viral genes detected	1	25	300	91.8
ZHd1-k141_406594	Unclassified Virus	7378	3.86794	30.8	4.76	39.2	15	11	0	High-quality	100	AAI-based (high-confidence)	0	1	contig >1.5x longer than expected genome length	1	6.67	107	32.96
ZHd1-k141_40558	Microviridae	4986	3.69775	26.6	18.61	47.81	8	5	0	High-quality	100	AAI-based (high-confidence)	0	1		1	12.5	278	73.95
ZHd1-k141_40517	Unclassified Virus	2260	3.35411	66.9	21.44	52.08	3	0	0	Complete	100	DTR (high-confidence)	0	1.1	no viral genes detected	1	33.33	119	79.61
ZHd1-k141_402308	Unclassified Virus	1590	3.2014	43.4	57.11	44.03	2	1	0	Complete	100	DTR (medium-confidence)	0	1.05		1	50	245	106.33
ZHd1-k141_398608	Unclassified Virus	2073	3.3166	19.9	48.52	51.13	2	1	0	High-quality	95.46	AAI-based (high-confidence)	0	1.1		1	50	296	58.9
ZHd1-k141_398174	Unclassified Virus	4222	3.62552	24.3	44.5	34.65	3	1	0	Complete	100	DTR (high-confidence)	0	1		1	33.33	457	111.05
ZHd1-k141_39761	Circoviridae	2328	3.36698	76.9	20.87	46.31	4	0	0	High-quality	100	AAI-based (medium-confidence)	0	1	no viral genes detected	1	25	86	66.13
ZHd1-k141_39758	Unknown	4501	3.65331	42.7	6.92	43.06	10	7	0	High-quality	100	AAI-based (medium-confidence)	0	1		1	10	81	34.59
ZHd1-k141_397372	Microviridae	4469	3.65021	22.5	22.95	42.65	7	4	0	Complete	100	DTR (high-confidence)	0	1		1	14.29	305	68.62
ZHd1-k141_397227	Unclassified Virus	3224	3.5084	75.9	5.96	52.67	8	0	0	High-quality	100	AAI-based (medium-confidence)	0	1	no viral genes detected	1	12.5	57	43.26
ZHd1-k141_396454	Microviridae	4136	3.61658	28.9	9.13	43.86	8	6	0	High-quality	91.05	AAI-based (high-confidence)	0	1		1	12.5	94	27.17
ZHd1-k141_395962	Unknown	1816	3.25912	0	0	43.39	3	1	0	Complete	100	DTR (medium-confidence)	0	1.1
ZHd1-k141_395217	Unclassified Virus	2142	3.33082	22.2	48.85	44.44	2	1	0	Complete	100	DTR (high-confidence)	0	1.1		1	50	298	66.16
ZHd1-k141_394403	Unclassified Virus	2613	3.41714	25.1	36.63	34.4	4	2	0	High-quality	100	AAI-based (medium-confidence)	0	1		1	25	296	74.3
ZHd1-k141_390715	Unclassified Virus	4320	3.63548	36.2	13.29	40.3	5	2	0	High-quality	100	HMM-based (lower-bound)	0	1		1	20	157	56.83
ZHd1-k141_390288	Unclassified Virus	2130	3.32838	25.4	58.43	37.98	2	1	0	Complete	100	DTR (high-confidence)	0	1.1		1	50	312	79.25
ZHd1-k141_390211	Unclassified Virus	3394	3.53071	26.4	30.53	53.83	4	1	0	Complete	100	DTR (medium-confidence)	0	1		1	25	316	83.42
ZHd1-k141_389225	Unclassified Virus	3577	3.55352	44.4	5.56	41.49	11	2	0	High-quality	100	AAI-based (medium-confidence)	0	1		1	9.09	65	28.86
ZHd1-k141_388812	Unclassified Virus	2210	3.34439	24.6	46.4	44.57	2	1	0	High-quality	100	HMM-based (lower-bound)	0	1		1	50	245	60.27
ZHd1-k141_38736	Unclassified Virus	2586	3.41263	0	0	31.55	6	1	0	High-quality	100	HMM-based (lower-bound)	0	1
ZHd1-k141_38541	Unclassified Virus	2050	3.31175	23	58.09	51.66	2	2	0	Complete	100	DTR (high-confidence)	0	1.1		1	50	298	68.54
ZHd1-k141_38418	Unclassified Virus	3299	3.51838	32.7	13.58	37.01	5	1	0	High-quality	100	AAI-based (medium-confidence)	0	1		1	20	126	41.2
ZHd1-k141_383973	Circoviridae	3628	3.55967	23.9	47.88	35.94	2	1	0	High-quality	100	AAI-based (medium-confidence)	0	1	contig >1.5x longer than expected genome length	1	50	498	119.02
ZHd1-k141_383688	Unclassified Virus	1890	3.27646	40.3	47.4	39.89	2	2	0	Complete	100	DTR (medium-confidence)	0	1.1		1	50	146	58.84
ZHd1-k141_383622	Unclassified Virus	2127	3.32777	33.9	20.92	36.72	3	0	0	Complete	100	DTR (high-confidence)	0	1.1	no viral genes detected	1	33.33	123	41.7
ZHd1-k141_383561	Unclassified Virus	2314	3.36436	54.1	17.19	48.06	5	0	0	Complete	100	DTR (high-confidence)	0	1.1	no viral genes detected	1	20	120	64.92
ZHd1-k141_380680	Unclassified Virus	2195	3.34143	26.3	59.07	46.92	3	2	0	High-quality	100	AAI-based (medium-confidence)	0	1		1	33.33	342	89.95
ZHd1-k141_379864	Circoviridae	3861	3.5867	25	24.65	47.35	5	2	0	Complete	100	DTR (medium-confidence)	0	1		1	20	248	62
ZHd1-k141_379449	Unclassified Virus	2304	3.36248	24.1	52.51	47.18	3	2	0	Complete	100	DTR (high-confidence)	0	1		1	33.33	335	80.74
ZHd1-k141_379389	Unclassified Virus	2159	3.33425	28.1	35.88	47.06	4	2	0	High-quality	97.02	HMM-based (lower-bound)	0	1		1	25	211	59.29
ZHd1-k141_377380	Unclassified Virus	3873	3.58805	24.2	26.97	41.62	4	2	0	High-quality	100	AAI-based (medium-confidence)	0	1		1	25	321	77.68
ZHd1-k141_377069	Unclassified Virus	2836	3.45271	25	35.66	40.09	5	0	0	High-quality	100	AAI-based (medium-confidence)	0	1	no viral genes detected	1	20	225	56.25
ZHd1-k141_377016	Microviridae	4450	3.64836	48.9	4.63	53.6	8	6	0	High-quality	96.08	AAI-based (medium-confidence)	0	1		1	12.5	62	30.32
ZHd1-k141_376927	Unclassified Virus	2238	3.34986	24.7	54.13	53.57	2	1	0	High-quality	94.32	AAI-based (high-confidence)	0	1		1	50	295	72.86
ZHd1-k141_376609	Unclassified Virus	4783	3.6797	34.4	12.26	56.64	5	3	0	High-quality	100	AAI-based (medium-confidence)	0	1		1	20	159	54.7
ZHd1-k141_375896	Unclassified Virus	2036	3.30878	48.6	18.4	32.22	4	1	0	High-quality	100	AAI-based (medium-confidence)	0	1		1	25	108	52.49
ZHd1-k141_373999	Microviridae	4942	3.6939	34.4	7.49	45.93	8	4	0	Complete	100	DTR (high-confidence)	0	1		1	12.5	119	40.94
ZHd1-k141_373415	Unclassified Virus	2258	3.35372	0	0	52.35	3	2	0	High-quality	98.19	HMM-based (lower-bound)	0	1
ZHd1-k141_373363	Unclassified Virus	2125	3.32736	27.1	35.08	35.81	3	2	0	Complete	100	DTR (high-confidence)	0	1.1		1	33.33	208	56.37
ZHd1-k141_371999	Unknown	1873	3.27254	62.7	37.31	34.28	3	1	0	High-quality	98.4	AAI-based (medium-confidence)	0	1		1	33.33	175	109.72
ZHd1-k141_371935	Circoviridae	2637	3.42111	24.5	44.37	41.9	3	1	0	High-quality	100	AAI-based (medium-confidence)	0	1		1	33.33	260	63.7
ZHd1-k141_370357	Unknown	2995	3.4764	27.5	35.76	37.73	4	1	0	High-quality	100	HMM-based (lower-bound)	0	1		1	25	236	64.9
ZHd1-k141_369563	Unclassified Virus	2135	3.3294	26.1	25.08	31.94	4	4	0	High-quality	100	AAI-based (high-confidence)	0	1		1	25	156	40.72
ZHd1-k141_369545	Microviridae	4338	3.63729	22	37.9	54.47	6	1	0	Complete	100	DTR (high-confidence)	0	1		1	16.67	479	105.38
ZHd1-k141_367353	Circoviridae	1958	3.29181	30.9	25.77	47.5	3	3	0	Complete	100	DTR (medium-confidence)	0	1.1		1	33.33	150	46.35
ZHd1-k141_366296	Unclassified Virus	1944	3.2887	28.2	27.98	46.35	4	3	0	High-quality	91.12	HMM-based (lower-bound)	0	1		1	25	169	47.66
ZHd1-k141_365606	Unclassified Virus	2171	3.33666	27.5	52.65	37.95	4	0	0	High-quality	99.88	AAI-based (high-confidence)	0	1	no viral genes detected	1	25	258	70.95
ZHd1-k141_364028	Unknown	4200	3.62325	51.4	32.9	38.14	3	1	0	High-quality	100	AAI-based (high-confidence)	0	1		1	33.33	352	180.93
ZHd1-k141_363980	Unclassified Virus	6550	3.81624	33.8	6.28	56.41	10	4	0	High-quality	100	AAI-based (medium-confidence)	0	1		1	10	123	41.57
ZHd1-k141_363740	Unclassified Virus	4474	3.6507	32.5	7.71	43.36	10	0	0	High-quality	100	AAI-based (medium-confidence)	0	1	no viral genes detected; contig >1.5x longer than expected genome length	1	10	84	27.3
ZHd1-k141_363701	Microviridae	4518	3.65495	32.8	6.97	45.97	6	6	0	High-quality	97.66	AAI-based (high-confidence)	0	1		1	16.67	94	30.83
ZHd1-k141_363161	Unknown	2087	3.31952	0	0	33.97	3	2	0	Complete	100	DTR (medium-confidence)	0	1.1
ZHd1-k141_363071	Circoviridae	4075	3.61013	23.2	24.7	45.79	5	2	0	Complete	100	DTR (high-confidence)	0	1		1	20	308	71.46
ZHd1-k141_36193	Microviridae	4462	3.64953	31.3	6.94	44.17	5	5	0	Complete	100	ITR (high-confidence)	0	1		1	20	85	26.61
ZHd1-k141_361682	Unclassified Virus	1899	3.27852	66.9	25	51.61	3	0	0	High-quality	92.32	AAI-based (high-confidence)	0	1	no viral genes detected	1	33.33	119	79.61
ZHd1-k141_360557	Unclassified Virus	2970	3.47276	26.5	33.42	40.64	4	2	0	High-quality	100	HMM-based (lower-bound)	0	1		1	25	256	67.84
ZHd1-k141_360535	Circoviridae	2064	3.31471	24.7	51.31	41.38	2	1	0	Complete	100	DTR (high-confidence)	0	1.1		1	50	293	72.37
ZHd1-k141_36037	Unclassified Virus	2515	3.40054	35.1	10.57	39.84	5	4	0	High-quality	100	AAI-based (medium-confidence)	0	1		1	20	87	30.54
ZHd1-k141_359668	Unknown	2270	3.35603	0	0	42.73	3	1	0	High-quality	95.62	HMM-based (lower-bound)	0	1
ZHd1-k141_35949	Unclassified Virus	3979	3.59977	23.3	32.98	53.76	5	2	0	High-quality	99.77	HMM-based (lower-bound)	0	1		1	20	344	80.15
ZHd1-k141_358019	Unclassified Virus	3550	3.55023	26.6	22.35	45.61	5	3	0	High-quality	99.09	HMM-based (lower-bound)	0	1		1	20	207	55.06
ZHd1-k141_356752	Unclassified Virus	1948	3.28959	24.2	45.67	38.91	3	3	0	Complete	100	DTR (medium-confidence)	0	1.1		1	33.33	264	63.89
ZHd1-k141_356276	Unclassified Virus	3305	3.51917	37.1	9.66	40.94	9	0	0	Complete	100	DTR (high-confidence)	0	1	no viral genes detected	1	11.11	92	34.13
ZHd1-k141_356121	Unclassified Virus	2203	3.34301	24.9	73.22	45.17	3	2	0	High-quality	97.09	HMM-based (lower-bound)	0	1		1	33.33	298	74.2
ZHd1-k141_353091	Unclassified Virus	1993	3.29951	36.6	45.96	26.49	2	1	0	High-quality	100	AAI-based (high-confidence)	0	1		1	50	256	93.7
ZHd1-k141_350787	Unclassified Virus	2276	3.35717	35	35.06	36.42	3	3	0	High-quality	97.2	HMM-based (lower-bound)	0	1		1	33.33	210	73.5
ZHd1-k141_350645	Circoviridae	3714	3.56984	56	29.97	45.32	3	0	0	High-quality	100	AAI-based (medium-confidence)	0	1	no viral genes detected; contig >1.5x longer than expected genome length	1	33.33	95	53.2
ZHd1-k141_350421	Unclassified Virus	2087	3.31952	48.1	16.71	44.18	3	2	0	Complete	100	DTR (high-confidence)	0	1.1		1	33.33	69	33.19
ZHd1-k141_348619	Unclassified Virus	2416	3.3831	29.3	51.32	33.4	3	0	0	Complete	100	DTR (high-confidence)	0	1.1	no viral genes detected	1	33.33	312	91.42
ZHd1-k141_34750	Unclassified Virus	2046	3.31091	50.7	43.79	45.99	3	0	0	High-quality	100	AAI-based (medium-confidence)	0	1.05	no viral genes detected	1	33.33	67	33.97
ZHd1-k141_345034	Circoviridae	2991	3.47582	24.5	61.51	38.18	2	2	0	Complete	100	DTR (high-confidence)	0	1		1	50	382	93.59
ZHd1-k141_344221	Unclassified Virus	2841	3.45347	28	24	47.52	6	0	0	High-quality	100	AAI-based (high-confidence)	0	1	no viral genes detected	1	16.67	156	43.68
ZHd1-k141_343941	Unclassified Virus	2238	3.34986	22.2	52.83	48.08	2	1	0	Complete	100	DTR (medium-confidence)	0	1.1		1	50	317	70.37
ZHd1-k141_342357	Unclassified Virus	2341	3.3694	39.7	10.44	46.3	5	0	0	Complete	100	DTR (high-confidence)	0	1.1	no viral genes detected	1	20	73	28.98
ZHd1-k141_33967	Unclassified Virus	1880	3.27416	25.4	56.71	46.86	2	2	0	Complete	100	DTR (medium-confidence)	0	1.1		1	50	283	71.88
ZHd1-k141_339485	Unclassified Virus	2483	3.39498	23.8	53.11	50.79	2	1	0	High-quality	100	AAI-based (high-confidence)	0	1		1	50	307	73.07
ZHd1-k141_337863	Unclassified Virus	4208	3.62408	26	23.41	52.26	4	2	0	Complete	100	DTR (high-confidence)	0	1		1	25	269	69.94
ZHd1-k141_337749	Unclassified Virus	4930	3.69285	23.1	23.1	38.78	6	5	0	High-quality	100	AAI-based (high-confidence)	0	1		1	16.67	329	76
ZHd1-k141_33560	Circoviridae	3428	3.53504	33.5	34.79	29.75	3	2	0	High-quality	100	HMM-based (lower-bound)	0	1		1	33.33	239	80.06
ZHd1-k141_335437	Unclassified Virus	2747	3.43886	23.3	36.75	43.36	5	1	0	High-quality	100	AAI-based (medium-confidence)	0	1		1	20	233	54.29
ZHd1-k141_333670	Unclassified Virus	4406	3.64404	25.1	27.68	55.11	5	2	0	High-quality	96.03	AAI-based (medium-confidence)	0	1		1	20	333	83.58
ZHd1-k141_333459	Unclassified Virus	2577	3.41111	32.3	40.69	36.86	3	0	0	High-quality	100	AAI-based (medium-confidence)	0	1	no viral genes detected	1	33.33	249	80.43
ZHd1-k141_332628	Unclassified Virus	1754	3.24403	39.8	28.71	44.81	4	0	0	Complete	100	DTR (high-confidence)	0	1	no viral genes detected	1	25	120	47.76
ZHd1-k141_331646	Unknown	4360	3.63949	0	0	38.67	7	2	0	High-quality	100	HMM-based (lower-bound)	0	1
ZHd1-k141_331448	Unclassified Virus	2930	3.46687	25	28.55	47.47	5	2	0	High-quality	98.21	HMM-based (lower-bound)	0	1		1	20	245	61.25
ZHd1-k141_331075	Unclassified Virus	6220	3.79379	37.5	6.35	54.05	12	5	0	High-quality	100	AAI-based (medium-confidence)	0	1		1	8.33	130	48.75
ZHd1-k141_33093	Circoviridae	1961	3.29248	33.8	17.96	41.2	4	3	0	Complete	100	DTR (medium-confidence)	0	1.1		1	25	90	30.42
ZHd1-k141_329872	Unclassified Virus	2989	3.47553	22.8	41.64	43.79	4	0	0	High-quality	100	AAI-based (medium-confidence)	0	1	no viral genes detected	1	25	396	90.29
ZHd1-k141_3270	Circoviridae	5323	3.72616	23.7	21.18	42.57	6	2	0	Complete	100	DTR (high-confidence)	0	1		1	16.67	295	69.92
ZHd1-k141_32642	Unclassified Virus	3724	3.57101	0	0	49.54	6	3	0	High-quality	99.36	HMM-based (lower-bound)	0	1
ZHd1-k141_326066	Unclassified Virus	2591	3.41347	24.5	54.08	49.48	2	1	0	High-quality	100	AAI-based (high-confidence)	0	1		1	50	305	74.72
ZHd1-k141_325538	Unclassified Virus	3908	3.59195	23.2	32.21	45.34	6	1	0	Complete	100	DTR (high-confidence)	0	1		1	16.67	354	82.13
ZHd1-k141_324601	Unclassified Virus	2787	3.44514	27.9	36.41	37.75	4	1	0	Complete	100	DTR (high-confidence)	0	1		1	25	304	84.82
ZHd1-k141_322798	Unclassified Virus	1889	3.27623	24.6	53.71	46.64	2	2	0	Complete	100	DTR (medium-confidence)	0	1.1		1	50	268	65.93
ZHd1-k141_321738	Microviridae	4649	3.66736	29	9.53	54.29	7	7	0	High-quality	100	AAI-based (medium-confidence)	0	1		1	14.29	130	37.7
ZHd1-k141_320514	Unclassified Virus	2299	3.36154	41.7	25.71	44.63	5	0	0	Complete	100	DTR (high-confidence)	0	1.1	no viral genes detected	1	20	172	71.72
ZHd1-k141_320336	Microviridae	4234	3.62675	49.1	4.62	38.88	9	5	0	High-quality	94.95	AAI-based (medium-confidence)	0	1		1	11.11	56	27.5
ZHd1-k141_319821	Unclassified Virus	2123	3.32695	24.8	48.25	42.72	3	1	0	Complete	100	DTR (high-confidence)	0	1.1		1	33.33	304	75.39
ZHd1-k141_318141	Unclassified Virus	2630	3.41996	28.5	43.4	37.98	4	0	0	High-quality	100	AAI-based (high-confidence)	0	1	no viral genes detected	1	25	306	87.21
ZHd1-k141_317589	Microviridae	4674	3.66969	32.6	8.08	53.55	8	5	0	High-quality	100	AAI-based (high-confidence)	0	1		1	12.5	116	37.82
ZHd1-k141_317177	Circoviridae	1834	3.2634	22.9	52.72	41.44	3	2	0	Complete	100	DTR (medium-confidence)	0	1		1	33.33	320	73.28
ZHd1-k141_31620	Unclassified Virus	3091	3.4901	57.1	6.16	46.72	8	0	0	High-quality	100	AAI-based (medium-confidence)	0	1	no viral genes detected	1	12.5	49	27.98
ZHd1-k141_315647	Unclassified Virus	1392	3.14364	28.2	100	46.12	1	1	0	High-quality	100	AAI-based (high-confidence)	0	1		1	100	257	72.47
ZHd1-k141_31552	Unclassified Virus	2964	3.47188	36.4	6.42	40.62	7	0	0	Complete	100	DTR (high-confidence)	0	1	no viral genes detected	1	14.29	53	19.29
ZHd1-k141_3147	Circoviridae	1791	3.2531	37.5	32.18	44.5	3	2	0	Complete	100	DTR (medium-confidence)	0	1.1		1	33.33	149	55.88
ZHd1-k141_312918	Unclassified Virus	2865	3.45712	30.2	32.11	43.8	4	3	0	High-quality	100	AAI-based (medium-confidence)	0	1		1	25	202	61
ZHd1-k141_312503	Unclassified Virus	2232	3.34869	53.2	27	50.22	5	0	0	High-quality	100	AAI-based (medium-confidence)	0	1	no viral genes detected	1	20	179	95.23
ZHd1-k141_311884	Microviridae	4224	3.62572	30.3	7.47	45.98	8	6	0	High-quality	92.01	AAI-based (high-confidence)	0	1		1	12.5	93	28.18
ZHd1-k141_311630	Unclassified Virus	1880	3.27416	38.1	36.67	44.41	3	2	0	Complete	100	DTR (high-confidence)	0	1.1		1	33.33	183	69.72
ZHd1-k141_308240	Unclassified Virus	2115	3.32531	50.5	18.49	36.31	3	1	0	Complete	100	DTR (high-confidence)	0	1.1		1	33.33	110	55.55
ZHd1-k141_307636	Unclassified Virus	2688	3.42943	27.3	38.74	43.38	3	2	0	High-quality	100	AAI-based (medium-confidence)	0	1		1	33.33	203	55.42
ZHd1-k141_304763	Unclassified Virus	2410	3.38202	38.8	18.31	44.77	3	2	0	Complete	100	DTR (high-confidence)	0	1.1		1	33.33	134	51.99
ZHd1-k141_303865	Microviridae	4451	3.64846	20	27.19	55.61	6	2	0	High-quality	100	AAI-based (medium-confidence)	0	1		1	16.67	357	71.4
ZHd1-k141_302390	Unclassified Virus	3996	3.60163	20.9	27.38	39.34	4	4	0	High-quality	100	AAI-based (high-confidence)	0	1	contig >1.5x longer than expected genome length	1	25	291	60.82
ZHd1-k141_301477	Unclassified Virus	1668	3.2222	60.8	46.91	46.4	3	0	0	High-quality	94.61	AAI-based (medium-confidence)	0	1	no viral genes detected	1	33.33	91	55.33
ZHd1-k141_300765	Parvoviridae	5967	3.77576	0	0	46.74	8	2	0	High-quality	99.27	HMM-based (lower-bound)	0	1
ZHd1-k141_300635	Parvoviridae	5124	3.70961	29.1	33.96	32.96	5	3	0	High-quality	93.95	AAI-based (high-confidence)	0	1		1	20	540	157.14
ZHd1-k141_29940	Unclassified Virus	3647	3.56194	26.8	27.18	53.03	4	3	0	High-quality	100	AAI-based (medium-confidence)	0	1		1	25	246	65.93
ZHd1-k141_298633	Unclassified Virus	2048	3.31133	22.4	48.68	32.42	4	1	0	High-quality	90.11	AAI-based (medium-confidence)	0	1		1	25	277	62.05
ZHd1-k141_298258	Unknown	3071	3.48728	30.8	23.38	43.21	5	2	0	High-quality	100	HMM-based (lower-bound)	0	1		1	20	216	66.53
ZHd1-k141_297629	Unclassified Virus	1966	3.29358	24.8	44.18	48.22	3	1	0	Complete	100	DTR (medium-confidence)	0	1.1		1	33.33	220	54.56
ZHd1-k141_296829	Unclassified Virus	1831	3.26269	25.7	43.54	35.12	3	2	0	Complete	100	DTR (high-confidence)	0	1.1		1	33.33	229	58.85
ZHd1-k141_29580	Unclassified Virus	2269	3.35583	27	25.24	41.34	3	3	0	Complete	100	DTR (medium-confidence)	0	1.1		1	33.33	183	49.41
ZHd1-k141_293148	Unclassified Virus	2406	3.3813	28.7	100	42.1	1	1	0	High-quality	90.44	AAI-based (medium-confidence)	0	1.05		1	100	171	49.08
ZHd1-k141_29266	Microviridae	4730	3.67486	26.8	22	56.3	8	2	0	High-quality	100	AAI-based (medium-confidence)	0	1		1	12.5	310	83.08
ZHd1-k141_292125	Unknown	2003	3.30168	26.5	43.05	37.49	3	1	0	Complete	100	DTR (medium-confidence)	0	1.1		1	33.33	229	60.69
ZHd1-k141_291669	Microviridae	5435	3.7352	41.1	4.39	41.36	10	8	1	High-quality	100	AAI-based (high-confidence)	0	1		1	10	70	28.77
ZHd1-k141_291666	Unknown	1864	3.27045	37	37.61	39.32	3	1	0	Complete	100	DTR (high-confidence)	0	1.1		1	33.33	164	60.68
ZHd1-k141_290816	Unclassified Virus	2710	3.43297	31.5	45.82	56.72	4	1	0	High-quality	100	AAI-based (medium-confidence)	0	1		1	25	318	100.17
ZHd1-k141_290590	Unclassified Virus	3332	3.5227	53.8	7.89	41.45	7	1	0	High-quality	100	AAI-based (medium-confidence)	0	1		1	14.29	72	38.74
ZHd1-k141_289089	Circoviridae	2427	3.38507	21.7	44.35	44.46	3	2	0	High-quality	100	AAI-based (medium-confidence)	0	1		1	33.33	326	70.74
ZHd1-k141_288534	Unclassified Virus	3407	3.53237	25.7	30.94	42.59	3	1	0	Complete	100	DTR (medium-confidence)	0	1		1	33.33	319	81.98
ZHd1-k141_286859	Circoviridae	2919	3.46523	23.6	60.32	41.45	4	1	0	High-quality	100	AAI-based (medium-confidence)	0	1		1	25	228	53.81
ZHd1-k141_285937	Unclassified Virus	1962	3.2927	32.7	56.73	49.44	4	2	0	High-quality	100	AAI-based (medium-confidence)	0	1		1	25	278	90.91
ZHd1-k141_282522	Unclassified Virus	2106	3.32346	25.3	41.41	27.64	3	1	0	High-quality	100	HMM-based (lower-bound)	0	1		1	33.33	205	51.87
ZHd1-k141_282448	Unclassified Virus	2720	3.43457	49.09	23.81	45.81	5	1	0	High-quality	97.76	AAI-based (medium-confidence)	0	1		2	40	115	56.45
ZHd1-k141_281848	Unclassified Virus	3484	3.54208	28.6	24.17	35.48	5	2	0	High-quality	100	HMM-based (lower-bound)	0	1		1	20	226	64.64
ZHd1-k141_280382	Unclassified Virus	3226	3.50866	53.9	10.22	44.23	4	3	0	High-quality	100	AAI-based (medium-confidence)	0	1		1	25	82	44.2
ZHd1-k141_280332	Unclassified Virus	2003	3.30168	24.5	55.74	43.83	2	2	0	Complete	100	DTR (medium-confidence)	0	1.1		1	50	272	66.64
ZHd1-k141_280142	Unclassified Virus	1206	3.08135	63.8	82.51	47.76	2	1	0	Complete	100	DTR (high-confidence)	0	1.2		1	50	250	159.5
ZHd1-k141_278253	Unclassified Virus	1825	3.26126	44.9	47.66	43.51	2	0	0	High-quality	91.62	AAI-based (medium-confidence)	0	1	no viral genes detected	1	50	112	50.29
ZHd1-k141_277510	Unclassified Virus	2012	3.30363	29.5	45.42	48.71	2	1	0	Complete	100	DTR (high-confidence)	0	1.1		1	50	243	71.69
ZHd1-k141_277341	Unclassified Virus	1833	3.26316	24.2	87.04	26.4	2	1	0	Complete	100	DTR (medium-confidence)	0	1.1		1	50	329	79.62
ZHd1-k141_275917	Unclassified Virus	1949	3.28981	33	19.24	35.92	3	3	0	Complete	100	DTR (high-confidence)	0	1.1		1	33.33	112	36.96
ZHd1-k141_275398	Circoviridae	2836	3.45271	48.5	30	49.4	4	2	0	High-quality	100	AAI-based (medium-confidence)	0	1	contig >1.5x longer than expected genome length	1	25	159	77.11
ZHd1-k141_27420	Unclassified Virus	1944	3.2887	35.7	38.99	44.39	2	1	0	Complete	100	DTR (high-confidence)	0	1.1		1	50	170	60.69
ZHd1-k141_271276	Circoviridae	2455	3.39005	23.2	37.03	43.05	4	1	0	Complete	100	DTR (high-confidence)	0	1.1		1	25	297	68.9
ZHd1-k141_27105	Unknown	2835	3.45255	0	0	35.13	3	2	0	High-quality	100	HMM-based (lower-bound)	0	1
ZHd1-k141_270808	Unclassified Virus	2517	3.40088	35.4	12.27	53.95	7	0	0	Complete	100	DTR (high-confidence)	0	1.05	no viral genes detected	1	14.29	87	30.8
ZHd1-k141_270707	Unknown	2516	3.40071	24.5	39.61	43.72	3	2	0	High-quality	100	AAI-based (medium-confidence)	0	1		1	33.33	286	70.07
ZHd1-k141_268741	Circoviridae	4019	3.60412	40.2	11.02	49.64	4	2	0	High-quality	95.15	AAI-based (medium-confidence)	0	1		1	25	95	38.19
ZHd1-k141_265540	Unclassified Virus	2962	3.47159	26.6	24.27	38.25	4	1	0	High-quality	100	HMM-based (lower-bound)	0	1		1	25	191	50.81
ZHd1-k141_265387	Unclassified Virus	2092	3.32056	33.7	37.01	42.16	3	1	0	Complete	100	DTR (high-confidence)	0	1.1		1	33.33	198	66.73
ZHd1-k141_265370	Unclassified Virus	2116	3.32552	21.8	51.38	30.01	3	1	0	High-quality	99.25	AAI-based (high-confidence)	0	1		1	33.33	316	68.89
ZHd1-k141_264780	Circoviridae	2481	3.39463	28.6	44.71	33.98	3	1	0	High-quality	100	AAI-based (medium-confidence)	0	1		1	33.33	241	68.93
ZHd1-k141_264454	Unknown	5438	3.73544	32.2	25.93	53.7	8	2	0	Complete	100	DTR (high-confidence)	0	1		1	12.5	438	141.04
ZHd1-k141_264369	Microviridae	4422	3.64562	24.2	21.17	52.85	7	2	0	Complete	100	DTR (high-confidence)	0	1		1	14.29	305	73.81
ZHd1-k141_260253	Microviridae	4372	3.64068	29.5	11.34	41.29	7	7	0	High-quality	96.69	AAI-based (high-confidence)	0	1		1	14.29	138	40.71
ZHd1-k141_258961	Microviridae	5560	3.74507	37.5	3.57	44.33	10	8	0	High-quality	100	AAI-based (high-confidence)	0	1		1	10	60	22.5
ZHd1-k141_2566	Microviridae	4730	3.67486	35.5	8.53	58.71	8	6	0	Complete	100	DTR (high-confidence)	0	1		1	12.5	131	46.51
ZHd1-k141_254825	Unclassified Virus	1966	3.29358	30.4	36.21	31.59	3	0	0	Complete	100	DTR (high-confidence)	0	1.1	no viral genes detected	1	33.33	197	59.89
ZHd1-k141_254573	Unclassified Virus	2054	3.3126	25.8	48.77	51.31	4	2	0	High-quality	96.51	AAI-based (medium-confidence)	0	1.05		1	25	317	81.79
ZHd1-k141_253830	Unclassified Virus	2528	3.40278	22.5	60.67	52.02	3	0	0	High-quality	100	AAI-based (high-confidence)	0	1	no viral genes detected	1	33.33	310	69.75
ZHd1-k141_253755	Unclassified Virus	3908	3.59195	36.2	27.12	47.67	5	2	0	High-quality	93.91	HMM-based (lower-bound)	0	1		1	20	224	81.09
ZHd1-k141_251380	Unclassified Virus	3298	3.51825	32.2	75.1	42.6	3	1	0	High-quality	100	HMM-based (lower-bound)	0	1		1	33.33	389	125.26
ZHd1-k141_250927	Circoviridae	1879	3.27393	23.5	47.51	38.8	3	3	0	Complete	100	DTR (high-confidence)	0	1.1		1	33.33	267	62.74
ZHd1-k141_250776	Unclassified Virus	4390	3.64246	25.4	26.71	51.53	4	4	0	High-quality	100	AAI-based (medium-confidence)	0	1	contig >1.5x longer than expected genome length	1	25	301	76.45
ZHd1-k141_250208	Microviridae	4905	3.69064	30.2	9.94	40.55	9	5	0	High-quality	100	AAI-based (high-confidence)	0	1		1	11.11	141	42.58
ZHd1-k141_247242	Unclassified Virus	1951	3.29026	22.6	52.36	37.42	3	2	0	Complete	100	DTR (medium-confidence)	0	1.1		1	33.33	322	72.77
ZHd1-k141_244775	Circoviridae	1900	3.27875	33.8	22.57	36.47	3	1	0	High-quality	100	AAI-based (high-confidence)	0	1		1	33.33	102	34.48
ZHd1-k141_243837	Unclassified Virus	2013	3.30384	68.2	9.81	41.13	6	1	0	High-quality	100	AAI-based (high-confidence)	0	1		1	16.67	52	35.46
ZHd1-k141_243804	Unclassified Virus	3213	3.50691	0	0	30.1	5	2	0	Complete	100	DTR (high-confidence)	0	1
ZHd1-k141_241544	Microviridae	4273	3.63073	24.4	17.83	55.6	6	2	0	High-quality	99.71	AAI-based (medium-confidence)	0	1		1	16.67	235	57.34
ZHd1-k141_240281	Unclassified Virus	2445	3.38828	33.7	25.1	46.5	5	0	0	High-quality	100	AAI-based (medium-confidence)	0	1	no viral genes detected	1	20	182	61.33
ZHd1-k141_238532	Unclassified Virus	4145	3.61752	29	14.5	39.32	5	1	0	High-quality	99.61	HMM-based (lower-bound)	0	1		1	20	191	55.39
ZHd1-k141_23611	Unclassified Virus	27252	4.4354	36.4	0.67	53.75	49	9	0	High-quality	95.83	AAI-based (high-confidence)	0	1		1	2.04	60	21.84
ZHd1-k141_234818	Unclassified Virus	4047	3.60713	24.2	22.2	50.58	5	2	0	Complete	100	ITR (medium-confidence)	0	1		1	20	283	68.49
ZHd1-k141_234773	Unclassified Virus	3255	3.51255	32.6	24.19	45.53	6	2	0	High-quality	100	HMM-based (lower-bound)	0	1		1	16.67	202	65.85
ZHd1-k141_233436	Unclassified Virus	2478	3.3941	0	0	48.02	4	1	0	High-quality	96.06	HMM-based (lower-bound)	0	1
ZHd1-k141_2329	Unclassified Virus	1979	3.29645	28.2	35.22	36.94	3	1	0	Complete	100	DTR (high-confidence)	0	1.1		1	33.33	199	56.12
ZHd1-k141_22960	Unclassified Virus	2305	3.36267	41.3	17.16	44.16	5	1	0	High-quality	100	AAI-based (medium-confidence)	0	1		1	20	75	30.98
ZHd1-k141_228632	Unclassified Virus	1923	3.28398	25.5	42.6	47.95	3	3	0	Complete	100	DTR (medium-confidence)	0	1.1		1	33.33	239	60.95
ZHd1-k141_227005	Unclassified Virus	2430	3.38561	0	0	53.66	3	1	0	High-quality	94.2	HMM-based (lower-bound)	0	1
ZHd1-k141_225949	Microviridae	4276	3.63104	33.3	8.35	41.86	9	5	0	High-quality	94.21	AAI-based (medium-confidence)	0	1		1	11.11	116	38.63
ZHd1-k141_224485	Unknown	4900	3.6902	32.8	8.16	33.92	7	6	0	High-quality	100	AAI-based (medium-confidence)	0	1		1	14.29	121	39.69
ZHd1-k141_224232	Microviridae	6091	3.78469	24.6	21.07	43.56	9	3	0	High-quality	100	AAI-based (high-confidence)	0	1		1	11.11	386	94.96
ZHd1-k141_223585	Unknown	2673	3.427	24.7	37.24	42.54	6	2	0	High-quality	100	AAI-based (medium-confidence)	0	1		1	16.67	270	66.69
ZHd1-k141_222105	Microviridae	4634	3.66596	20.4	38.28	47.67	5	2	0	High-quality	100	AAI-based (medium-confidence)	0	1		1	20	482	98.33
ZHd1-k141_221409	Unclassified Virus	1896	3.27784	35.3	71.88	42.99	2	0	0	High-quality	100	AAI-based (high-confidence)	0	1	no viral genes detected	1	50	294	103.78
ZHd1-k141_220721	Microviridae	4925	3.69241	32.7	9.81	39.55	8	6	0	High-quality	100	AAI-based (high-confidence)	0	1		1	12.5	147	48.07
ZHd1-k141_220676	Circoviridae	1938	3.28735	35.6	34.03	50.67	4	1	0	Complete	100	DTR (high-confidence)	0	1.1		1	25	114	40.58
ZHd1-k141_219944	Unclassified Virus	1758	3.24502	43.7	56.77	44.03	2	1	0	High-quality	92.4	AAI-based (high-confidence)	0	1		1	50	239	104.44
ZHd1-k141_219007	Unclassified Virus	2138	3.33001	24.4	45.23	49.11	3	1	0	Complete	100	DTR (high-confidence)	0	1.1		1	33.33	308	75.15
ZHd1-k141_217765	Circoviridae	2027	3.30685	24.5	49.5	50.57	2	1	0	High-quality	94.81	AAI-based (medium-confidence)	0	1		1	50	298	73.01
ZHd1-k141_215219	Unclassified Virus	2401	3.38039	23.1	41.03	40.32	2	2	0	High-quality	100	AAI-based (medium-confidence)	0	1		1	50	256	59.14
ZHd1-k141_214876	Unclassified Virus	2490	3.3962	40.5	12.19	49.2	6	0	0	High-quality	100	AAI-based (high-confidence)	0	1	no viral genes detected	1	16.67	74	29.97
ZHd1-k141_214490	Unclassified Virus	2442	3.38775	25.2	64.04	45.99	2	0	0	High-quality	100	AAI-based (high-confidence)	0	1	no viral genes detected	1	50	342	86.18
ZHd1-k141_213889	Unclassified Virus	2410	3.38202	26.7	49.78	42.45	6	0	0	Complete	100	DTR (medium-confidence)	0	1.1	no viral genes detected	1	16.67	339	90.51
ZHd1-k141_21167	Unclassified Virus	1898	3.2783	37.9	41.8	32.56	3	2	0	Complete	100	DTR (high-confidence)	0	1.1		1	33.33	227	86.03
ZHd1-k141_210047	Unclassified Virus	1859	3.26928	23.5	49.17	44.32	3	3	0	Complete	100	DTR (medium-confidence)	0	1.1		1	33.33	268	62.98
ZHd1-k141_207354	Unclassified Virus	6249	3.79581	39.1	6.29	44.49	7	2	0	High-quality	100	HMM-based (lower-bound)	0	1		1	14.29	105	41.05
ZHd1-k141_20681	Unclassified Virus	1921	3.28353	26.5	40.41	45.5	3	1	0	High-quality	90.84	AAI-based (medium-confidence)	0	1.05		1	33.33	259	68.64
ZHd1-k141_206558	Unclassified Virus	3468	3.54008	36.3	19.5	40.54	6	0	0	High-quality	100	AAI-based (medium-confidence)	0	1	no viral genes detected	1	16.67	157	56.99
ZHd1-k141_206355	Circoviridae	2586	3.41263	30.4	28.6	47.45	4	1	0	High-quality	99.6	AAI-based (medium-confidence)	0	1		1	25	131	39.82
ZHd1-k141_206035	Parvoviridae	6084	3.78419	35.7	32.73	39.33	3	2	0	High-quality	97.74	HMM-based (lower-bound)	0	1		1	33.33	576	205.63
ZHd1-k141_205331	Circoviridae	2645	3.42243	23.1	44.46	45.63	4	1	0	High-quality	100	AAI-based (medium-confidence)	0	1		1	25	361	83.39
ZHd1-k141_202746	Unclassified Virus	1698	3.22994	23.9	87.63	27.15	2	1	0	High-quality	97.23	AAI-based (high-confidence)	0	1		1	50	340	81.26
ZHd1-k141_201998	Unclassified Virus	2059	3.31366	20.9	45.42	30.01	3	2	0	Complete	100	DTR (high-confidence)	0	1.1		1	33.33	278	58.1
ZHd1-k141_200737	Unclassified Virus	2038	3.3092	35	20.36	35.57	3	2	0	High-quality	100	AAI-based (high-confidence)	0	1		1	33.33	114	39.9
ZHd1-k141_20069	Unclassified Virus	1952	3.29048	27.8	43.82	46.72	2	2	0	Complete	100	DTR (high-confidence)	0	1.1		1	50	188	52.26
ZHd1-k141_200183	Unclassified Virus	2854	3.45545	0	0	45.83	3	2	0	High-quality	100	HMM-based (lower-bound)	0	1
ZHd1-k141_199565	Unclassified Virus	1869	3.27161	42.5	66.87	38.26	3	1	0	High-quality	95.23	AAI-based (medium-confidence)	0	1		1	33.33	329	139.82
ZHd1-k141_199411	Unclassified Virus	2712	3.43329	44.57	60.52	43.14	6	0	0	High-quality	97.99	AAI-based (high-confidence)	0	1	no viral genes detected	2	33.33	325	144.85
ZHd1-k141_198310	Unclassified Virus	1873	3.27254	34.6	28.73	45.92	3	1	0	Complete	100	DTR (medium-confidence)	0	1.1		1	33.33	156	53.98
ZHd1-k141_198309	Unclassified Virus	2408	3.38166	22.9	39.8	44.56	3	2	0	Complete	100	DTR (high-confidence)	0	1.1		1	33.33	242	55.42
ZHd1-k141_197337	Unclassified Virus	1901	3.27898	42.8	46.7	48.19	3	0	0	High-quality	96.24	AAI-based (medium-confidence)	0	1	no viral genes detected	1	33.33	198	84.74
ZHd1-k141_193552	Unclassified Virus	3145	3.49762	22.7	34.74	47.98	3	1	0	High-quality	100	AAI-based (medium-confidence)	0	1		1	33.33	280	63.56
ZHd1-k141_191686	Circoviridae	2134	3.32919	24.1	49.37	48.27	2	2	0	High-quality	100	HMM-based (lower-bound)	0	1		1	50	236	56.88
ZHd1-k141_190638	Unclassified Virus	2397	3.37967	28.1	43.47	35.21	2	1	0	Complete	100	DTR (high-confidence)	0	1.1		1	50	273	76.71
ZHd1-k141_188345	Unclassified Virus	2242	3.35064	30.2	50.4	35.59	3	0	0	High-quality	100	AAI-based (medium-confidence)	0	1	no viral genes detected	1	33.33	318	96.04
ZHd1-k141_18693	Unknown	2492	3.39655	31.2	37.09	45.43	3	2	0	High-quality	96.6	HMM-based (lower-bound)	0	1		1	33.33	224	69.89
ZHd1-k141_186711	Unclassified Virus	2751	3.43949	23.1	34.56	47.33	3	1	0	High-quality	100	AAI-based (medium-confidence)	0	1		1	33.33	282	65.14
ZHd1-k141_185953	Circoviridae	1916	3.2824	29.5	25.57	42.07	3	3	0	Complete	100	DTR (medium-confidence)	0	1.1		1	33.33	145	42.77
ZHd1-k141_1826	Microviridae	5874	3.76893	23.4	11.67	43.29	13	7	0	High-quality	100	AAI-based (high-confidence)	0	1		1	7.69	198	46.33
ZHd1-k141_18146	Unclassified Virus	3303	3.51891	33.7	10.39	42.02	6	2	0	High-quality	99.09	HMM-based (lower-bound)	0	1		1	16.67	107	36.06
ZHd1-k141_181383	Unknown	2847	3.45439	30.1	31.09	41.83	3	2	0	High-quality	100	AAI-based (medium-confidence)	0	1		1	33.33	162	48.76
ZHd1-k141_178079	Unknown	4274	3.63083	26.9	6.95	51.12	7	6	0	High-quality	92.67	AAI-based (medium-confidence)	0	1		1	14.29	83	22.33
ZHd1-k141_175499	Unclassified Virus	2409	3.38184	23.3	47.36	44.58	3	2	0	Complete	100	DTR (high-confidence)	0	1.1		1	33.33	287	66.87
ZHd1-k141_17497	Unclassified Virus	3511	3.54543	29.3	25.87	40.16	5	4	0	High-quality	92.49	HMM-based (lower-bound)	0	1		1	20	268	78.52
ZHd1-k141_173312	Unclassified Virus	1960	3.29226	30.5	23.27	39.9	4	3	0	Complete	100	DTR (medium-confidence)	0	1.1		1	25	128	39.04
ZHd1-k141_169676	Unclassified Virus	2996	3.47654	47.1	9.36	36.68	8	0	0	Complete	100	DTR (high-confidence)	0	1	no viral genes detected	1	12.5	86	40.51
ZHd1-k141_169319	Unclassified Virus	3251	3.51202	42.7	11.21	41.89	8	0	0	High-quality	100	AAI-based (medium-confidence)	0	1	no viral genes detected; contig >1.5x longer than expected genome length	1	12.5	101	43.13
ZHd1-k141_167827	Unclassified Virus	1959	3.29203	28.7	37.13	35.53	4	3	0	Complete	100	DTR (high-confidence)	0	1.1		1	25	212	60.84
ZHd1-k141_167016	Unclassified Virus	2403	3.38075	30.9	12.36	47.9	7	0	0	High-quality	100	AAI-based (medium-confidence)	0	1	no viral genes detected	1	14.29	86	26.57
ZHd1-k141_165812	Unknown	6799	3.83245	24.7	18.21	56.82	10	2	0	High-quality	100	AAI-based (high-confidence)	0	1		1	10	340	83.98
ZHd1-k141_165789	Unknown	4976	3.69688	24	18.27	31.41	8	5	0	High-quality	100	AAI-based (high-confidence)	0	1		1	12.5	270	64.8
ZHd1-k141_164478	Unclassified Virus	2865	3.45712	28	24.64	45.24	4	2	0	High-quality	100	HMM-based (lower-bound)	0	1		1	25	189	52.92
ZHd1-k141_163584	Unclassified Virus	2295	3.36078	35.6	46.01	39.13	2	2	0	High-quality	100	AAI-based (medium-confidence)	0	1		1	50	121	43.08
ZHd1-k141_162768	Unclassified Virus	2327	3.3668	40.9	12.19	51.05	4	0	0	High-quality	92.02	AAI-based (medium-confidence)	0	1	no viral genes detected	1	25	59	24.13
ZHd1-k141_162253	Microviridae	5100	3.70757	31.6	13.71	39.22	7	3	0	High-quality	100	AAI-based (high-confidence)	0	1		1	14.29	196	61.94
ZHd1-k141_162092	Unknown	2367	3.3742	0	0	42.21	4	1	0	High-quality	100	HMM-based (lower-bound)	0	1
ZHd1-k141_159627	Circoviridae	3291	3.51733	26.5	53.25	35.37	5	2	0	High-quality	100	AAI-based (high-confidence)	0	1	contig >1.5x longer than expected genome length	2	40	451	119.52
ZHd1-k141_158969	Unclassified Virus	1997	3.30038	35.1	22.97	35.9	3	2	0	Complete	100	DTR (high-confidence)	0	1.1		1	33.33	119	41.77
ZHd1-k141_158818	Unclassified Virus	1897	3.27807	25.9	34.48	30.31	3	2	0	Complete	100	DTR (high-confidence)	0	1.1		1	33.33	171	44.29
ZHd1-k141_158766	Unclassified Virus	3462	3.53933	32.4	28.29	47.37	4	1	0	High-quality	91.6	HMM-based (lower-bound)	0	1		1	25	254	82.3
ZHd1-k141_156141	Unclassified Virus	2319	3.3653	27.5	34.84	47.35	4	1	0	High-quality	97.69	HMM-based (lower-bound)	0	1.05		1	25	177	48.67
ZHd1-k141_155831	Unclassified Virus	1960	3.29226	34.8	38.19	30.87	3	0	0	High-quality	100	AAI-based (medium-confidence)	0	1	no viral genes detected	1	33.33	186	64.73
ZHd1-k141_155098	Unclassified Virus	1891	3.27669	42.9	29.69	26.65	2	2	0	Complete	100	DTR (high-confidence)	0	1.1		1	50	125	53.62
ZHd1-k141_153651	Microviridae	4420	3.64542	26.3	24.46	42.49	4	3	0	Complete	100	DTR (high-confidence)	0	1		1	25	308	81
ZHd1-k141_14883	Circoviridae	1790	3.25285	42.3	31.03	47.49	4	1	0	High-quality	93.48	AAI-based (medium-confidence)	0	1		1	25	121	51.18
ZHd1-k141_147537	Unknown	2681	3.4283	39.3	11.35	38.72	4	2	0	Complete	100	DTR (medium-confidence)	0	1.1		1	25	88	34.58
ZHd1-k141_14723	Unclassified Virus	2610	3.41664	50	10.07	51.88	9	0	0	High-quality	100	AAI-based (high-confidence)	0	1.05	no viral genes detected	1	11.11	74	37
ZHd1-k141_146155	Unclassified Virus	1909	3.28081	33.6	25.14	34.15	3	1	0	Complete	100	DTR (high-confidence)	0	1.1		1	33.33	134	45.02
ZHd1-k141_145477	Unclassified Virus	2578	3.41128	24.6	34.07	38.71	2	1	0	High-quality	100	AAI-based (medium-confidence)	0	1		1	50	247	60.76
ZHd1-k141_145047	Circoviridae	2203	3.34301	23.9	49.15	34.59	3	3	0	Complete	100	DTR (high-confidence)	0	1.1		1	33.33	288	68.83
ZHd1-k141_144916	Unknown	2029	3.30728	0	0	33.27	3	1	0	Complete	100	DTR (high-confidence)	0	1.1
ZHd1-k141_140601	Unclassified Virus	4345	3.63799	26.6	21.97	63.13	6	2	0	High-quality	94.37	AAI-based (medium-confidence)	0	1		1	16.67	266	70.76
ZHd1-k141_140242	Circoviridae	1756	3.24452	27.5	44.32	35.19	3	2	0	Complete	100	DTR (medium-confidence)	0	1.1		1	33.33	230	63.25
ZHd1-k141_139344	Unclassified Virus	2373	3.3753	42	25.36	46.4	5	0	0	Complete	100	DTR (high-confidence)	0	1.1	no viral genes detected	1	20	177	74.34
ZHd1-k141_138406	Circoviridae	1967	3.2938	0	0	41.23	3	2	0	Complete	100	DTR (high-confidence)	0	1.1
ZHd1-k141_137741	Unclassified Virus	2179	3.33826	47.4	51.96	43.32	3	0	0	High-quality	100	AAI-based (high-confidence)	0	1	no viral genes detected	1	33.33	279	132.25
ZHd1-k141_1360	Unclassified Virus	2142	3.33082	33.6	23.72	50.33	3	3	0	Complete	100	DTR (medium-confidence)	0	1.1		1	33.33	148	49.73
ZHd1-k141_135768	Unclassified Virus	2374	3.37548	24.9	66.76	33.78	2	2	0	High-quality	100	AAI-based (medium-confidence)	0	1		1	50	466	116.03
ZHd1-k141_134898	Unclassified Virus	3415	3.53339	24.7	26.03	47.94	5	3	0	High-quality	99.08	HMM-based (lower-bound)	0	1		1	20	247	61.01
ZHd1-k141_131652	Unclassified Virus	2197	3.34183	25.7	48.35	37.46	3	2	0	High-quality	98.15	AAI-based (medium-confidence)	0	1		1	33.33	278	71.45
ZHd1-k141_131568	Unclassified Virus	3855	3.58602	23.4	25.91	43.04	2	1	0	High-quality	92.64	HMM-based (lower-bound)	0	1		1	50	278	65.05
ZHd1-k141_131217	Unclassified Virus	2589	3.41313	25.3	35.38	47.86	3	1	0	High-quality	100	AAI-based (medium-confidence)	0	1		1	33.33	283	71.6
ZHd1-k141_128442	Unclassified Virus	4170	3.62014	26.1	32.54	33.88	5	2	0	High-quality	100	AAI-based (medium-confidence)	0	1		1	20	288	75.17
ZHd1-k141_125152	Microviridae	4296	3.63306	23.3	19.8	54.82	6	3	0	Complete	100	DTR (high-confidence)	0	1		1	16.67	260	60.58
ZHd1-k141_122996	Microviridae	7680	3.88536	26.2	9.65	39.53	11	6	0	High-quality	100	AAI-based (medium-confidence)	0	1	contig >1.5x longer than expected genome length	1	9.09	230	60.26
ZHd1-k141_12163	Circoviridae	2144	3.33122	27.4	38.03	36.8	3	2	0	High-quality	97	HMM-based (lower-bound)	0	1.05		1	33.33	232	63.57
ZHd1-k141_120592	Unclassified Virus	1968	3.29403	32.8	56.05	43.65	3	0	0	Complete	100	DTR (high-confidence)	0	1.1	no viral genes detected	1	33.33	315	103.32
ZHd1-k141_119500	Circoviridae	2191	3.34064	25.3	50.66	34.41	3	1	0	High-quality	100	AAI-based (medium-confidence)	0	1		1	33.33	231	58.44
ZHd1-k141_11853	Circoviridae	1774	3.24895	26.9	47.44	39.97	3	1	0	High-quality	100	AAI-based (medium-confidence)	0	1.1		1	33.33	213	57.3
ZHd1-k141_117746	Unclassified Virus	1890	3.27646	38.5	17.98	42.8	3	3	0	High-quality	92.5	AAI-based (medium-confidence)	0	1		1	33.33	103	39.66
ZHd1-k141_117385	Circoviridae	2590	3.4133	23.2	51.11	49.07	2	1	0	High-quality	100	AAI-based (high-confidence)	0	1		1	50	298	69.14
ZHd1-k141_11654	Unclassified Virus	4355	3.63899	38.1	6.54	56.42	7	3	0	Complete	100	ITR (high-confidence)	0	1		1	14.29	88	33.53
ZHd1-k141_116020	Unknown	4891	3.6894	24.2	22.13	34.21	8	3	0	High-quality	95.72	AAI-based (medium-confidence)	0	1		1	12.5	320	77.44
ZHd1-k141_112592	Unknown	3763	3.57553	0	0	41.11	5	2	0	High-quality	90.43	HMM-based (lower-bound)	0	1
ZHd1-k141_112402	Riboviria	3853	3.5858	23.4	50.4	38.9	2	1	0	High-quality	100	AAI-based (medium-confidence)	0	1		1	50	626	146.48
ZHd1-k141_110588	Unclassified Virus	4408	3.64424	29.1	8.84	40.59	7	3	0	Complete	100	DTR (high-confidence)	0	1		1	14.29	123	35.79
ZHd1-k141_110296	Microviridae	4313	3.63478	19.6	37.28	53.3	7	2	0	Complete	100	DTR (high-confidence)	0	1		1	14.29	488	95.65
ZHd1-k141_109560	Unclassified Virus	2277	3.35736	22.4	46.09	41.72	3	1	0	Complete	100	DTR (high-confidence)	0	1.1		1	33.33	295	66.08
ZHd1-k141_10928	Circoviridae	2771	3.44264	24.6	37.8	35.37	3	1	0	High-quality	100	AAI-based (medium-confidence)	0	1		1	33.33	282	69.37
ZHd1-k141_108228	Unclassified Virus	2051	3.31197	23.5	40.42	51.54	2	2	0	Complete	100	DTR (high-confidence)	0	1.1		1	50	211	49.59
ZHd1-k141_107898	Unclassified Virus	1871	3.27207	28	37.97	43.56	3	3	0	Complete	100	DTR (medium-confidence)	0	1.1		1	33.33	221	61.88
ZHd1-k141_107649	Microviridae	7396	3.869	32.7	6.57	37.36	15	4	0	High-quality	100	AAI-based (high-confidence)	0	1	contig >1.5x longer than expected genome length	1	6.67	132	43.16
ZHd1-k141_107508	Parvoviridae	6958	3.84248	0	0	38.92	6	2	0	Complete	100	DTR (high-confidence)	0	1
ZHd1-k141_107036	Microviridae	4372	3.64068	25.2	21.41	54.67	6	2	0	Complete	100	DTR (high-confidence)	0	1		1	16.67	289	72.83
ZHd1-k141_106652	Unclassified Virus	3379	3.52879	26.6	36.42	51.05	3	1	0	Complete	100	DTR (medium-confidence)	0	1		1	33.33	303	80.6
ZHd1-k141_106602	Microviridae	4376	3.64108	23.7	20.47	56.38	6	2	0	Complete	100	DTR (high-confidence)	0	1		1	16.67	279	66.12
ZHd1-k141_106544	Unclassified Virus	3096	3.4908	32.3	11.06	56.85	6	0	0	Complete	100	DTR (high-confidence)	0	1	no viral genes detected	1	16.67	93	30.04
ZHd1-k141_106390	Microviridae	4864	3.68699	23.4	14.55	33.51	8	3	0	High-quality	100	AAI-based (high-confidence)	0	1		1	12.5	212	49.61
ZHd1-k141_106220	Unclassified Virus	2223	3.34694	23	56.07	47.86	3	1	0	High-quality	96.09	AAI-based (high-confidence)	0	1.1		1	33.33	342	78.66
ZHd1-k141_10601	Unclassified Virus	1994	3.29973	24.5	45.24	43.48	3	1	0	Complete	100	DTR (high-confidence)	0	1.1		1	33.33	247	60.52
ZHd1-k141_105786	Circoviridae	3548	3.54998	24	42.17	53.3	2	2	0	High-quality	93.46	HMM-based (lower-bound)	0	1		1	50	342	82.08
ZHd1-k141_103500	Circoviridae	1814	3.25864	26.9	33.75	43.94	4	3	0	High-quality	100	AAI-based (medium-confidence)	0	1		1	25	163	43.85
ZHd1-k141_102059	Microviridae	6590	3.81889	28.9	13.5	51.31	8	7	0	High-quality	100	AAI-based (medium-confidence)	0	1		1	12.5	267	77.16
ZHd1-k141_101737	Unclassified Virus	2492	3.39655	26.4	35.72	57.26	3	1	0	Complete	100	DTR (high-confidence)	0	1.1		1	33.33	249	65.74
ZHd1-k141_101445	Circoviridae	2408	3.38166	21.3	53.73	45.89	2	2	0	Complete	100	DTR (high-confidence)	0	1.1		1	50	317	67.52
ZHd1-k141_101440	Microviridae	5309	3.72501	39.3	5.91	45.83	8	5	0	High-quality	100	AAI-based (high-confidence)	0	1		1	12.5	86	33.8
ZHd1-k141_100230	Unclassified Virus	4064	3.60895	40.7	7.02	39.74	7	0	0	High-quality	100	AAI-based (medium-confidence)	0	1	no viral genes detected	1	14.29	84	34.19
ZH2-k141_54404	Unclassified Virus	3525	3.54716	38.7	11.88	38.92	6	1	0	High-quality	100	HMM-based (lower-bound)	0	1		1	16.67	117	45.28
ZH1-k141_96265	Myoviridae	13719	4.13732	23.2	10.66	40.87	19	7	0	High-quality	100	AAI-based (medium-confidence)	0	1		1	5.26	404	93.73
ZH1-k141_95255	Podoviridae	37496	4.57398	33.3	0.72	44.26	60	14	2	High-quality	97.22	AAI-based (high-confidence)	0	1		1	1.67	85	28.3
ZH1-k141_85361	Siphoviridae	42278	4.62611	42.9	0.53	62.78	65	14	0	High-quality	95.52	AAI-based (high-confidence)	0	1		1	1.54	69	29.6
ZH1-k141_63857	Podoviridae	42092	4.6242	36.1	0.57	57.38	73	16	1	Complete	100	DTR (medium-confidence)	0	1		1	1.37	73	26.35
ZH1-k141_47543	Siphoviridae	42519	4.62858	46.7	0.5	44.89	70	27	0	High-quality	93.49	AAI-based (medium-confidence)	0	1		1	1.43	63	29.42
ZH1-k141_28026	Unknown	4598	3.66257	25.5	36.39	34.21	6	1	0	High-quality	100	HMM-based (lower-bound)	0	1		1	16.67	460	117.3
ZH1-k141_252866	Unclassified Virus	2208	3.344	24.7	48.48	44.16	5	1	0	Complete	100	DTR (medium-confidence)	0	1.1		1	20	304	75.09
ZH1-k141_25111	Unclassified Virus	3473	3.5407	29	63.58	33.63	5	1	0	High-quality	100	HMM-based (lower-bound)	0	1		1	20	522	151.38
ZH1-k141_247971	Unclassified Virus	7290	3.86273	24.6	14.58	37.35	12	1	0	Complete	100	DTR (high-confidence)	0	1		1	8.33	302	74.29
ZH1-k141_246905	Podoviridae	36667	4.56428	32.7	0.91	43.42	63	15	0	High-quality	100	AAI-based (high-confidence)	0	1		1	1.59	104	34.01
ZH1-k141_229923	Siphoviridae	32446	4.51116	34.4	0.59	36.49	52	19	0	Complete	100	DTR (high-confidence)	0	1		1	1.92	61	20.98
ZH1-k141_216311	Myoviridae	61161	4.78647	42.9	0.29	47.4	76	25	1	High-quality	97.79	AAI-based (high-confidence)	0	1		1	1.32	57	24.45
ZH1-k141_185825	Autographiviridae	59749	4.77633	36.7	0.26	49.36	89	26	1	Complete	100	DTR (high-confidence)	0	1		1	1.12	50	18.35
ZH1-k141_182748	Podoviridae	101318	5.00569	28.6	0.4	28.68	124	22	1	Complete	100	DTR (high-confidence)	0	1		1	0.81	122	34.89
ZH1-k141_172074	Circoviridae	2090	3.32015	21.4	42.54	51.29	2	1	0	High-quality	95.27	AAI-based (medium-confidence)	0	1		1	50	271	57.99
ZH1-k141_161109	Unclassified Virus	3330	3.52244	0	0	32.94	2	1	0	High-quality	100	HMM-based (lower-bound)	0	1
ZH1-k141_153620	Unclassified Virus	7413	3.86999	38.9	9.26	52.73	6	1	0	High-quality	100	HMM-based (lower-bound)	0	1		1	16.67	176	68.46
ZH1-k141_142079	Unknown	8822	3.94557	0	0	37.1	11	1	0	High-quality	100	HMM-based (lower-bound)	0	1
ZH1-k141_13999	Myoviridae	44982	4.65304	37.7	0.45	40.94	65	12	0	High-quality	90.83	AAI-based (medium-confidence)	0	1		1	1.54	63	23.75
ZH1-k141_126960	Podoviridae	10708	4.02971	33	3.46	33.71	14	4	0	High-quality	90.88	AAI-based (high-confidence)	0	1		1	7.14	118	38.94
YJr3-k141_6418	Unclassified Virus	1881	3.27439	24.9	56.16	47.32	2	1	0	Complete	100	DTR (high-confidence)	0	1.1		1	50	228	56.77
YJr3-k141_5201	Unclassified Virus	1664	3.22115	40.9	45.54	45.97	2	2	0	High-quality	94.82	AAI-based (medium-confidence)	0	1		1	50	194	79.35
YJr3-k141_47907	Circoviridae	3409	3.53263	25.3	17.9	45.97	5	3	0	High-quality	98.88	HMM-based (lower-bound)	0	1		1	20	152	38.46
YJr3-k141_40402	Unknown	2826	3.45117	47.4	11.3	46	5	3	0	High-quality	100	AAI-based (medium-confidence)	0	1		1	20	85	40.29
YJr3-k141_30327	Circoviridae	1881	3.27439	25.7	52.93	31.58	2	1	0	High-quality	100	AAI-based (high-confidence)	0	1		1	50	226	58.08
YJr3-k141_25827	Unclassified Virus	2506	3.39898	30.9	34.51	46.49	4	1	0	High-quality	97.14	HMM-based (lower-bound)	0	1		1	25	185	57.16
YJr3-k141_24881	Genomoviridae	2093	3.32077	32.8	33.4	54.28	4	1	0	High-quality	95.45	AAI-based (high-confidence)	0	1		1	25	161	52.81
YJr3-k141_16914	Unclassified Virus	1924	3.28421	32.1	100	41.42	1	0	0	High-quality	90.2	AAI-based (high-confidence)	0	1	no viral genes detected	1	100	268	86.03
YJr3-k141_16724	Unclassified Virus	2192	3.34084	26.4	43.23	43.7	3	2	0	High-quality	98.13	HMM-based (lower-bound)	0	1		1	33.33	233	61.51
YJr3-k141_15070	Unknown	2474	3.3934	0	0	39.77	5	2	0	High-quality	95.9	HMM-based (lower-bound)	0	1
YJr3-k141_14889	Genomoviridae	2862	3.45667	34.5	19.61	48.46	3	2	0	High-quality	99.75	HMM-based (lower-bound)	0	1		1	33.33	111	38.3
YJr2-k141_7567	Unclassified Virus	2806	3.44809	26.9	42.97	46.08	3	1	0	High-quality	100	HMM-based (lower-bound)	0	1		1	33.33	226	60.79
YJr2-k141_7314	Genomoviridae	2248	3.3518	37.2	16.46	49.51	3	1	0	High-quality	100	AAI-based (high-confidence)	0	1		1	33.33	93	34.6
YJr2-k141_61473	Unclassified Virus	1730	3.23805	44.6	40.75	49.65	4	2	0	Complete	100	DTR (high-confidence)	0	1.1		1	25	218	97.23
YJr2-k141_59040	Unclassified Virus	2160	3.33445	28	28.41	37.36	3	3	0	High-quality	94.57	AAI-based (medium-confidence)	0	1		1	33.33	171	47.88
YJr2-k141_52994	Unclassified Virus	2358	3.37254	37.2	18.86	41.77	3	3	0	High-quality	97.32	HMM-based (lower-bound)	0	1		1	33.33	116	43.15
YJr2-k141_52224	Unclassified Virus	4564	3.65935	25.3	16.67	42.99	6	5	0	High-quality	100	AAI-based (medium-confidence)	0	1	contig >1.5x longer than expected genome length	1	16.67	197	49.84
YJr2-k141_51061	Unclassified Virus	1837	3.26411	36.4	49.63	51.71	3	1	0	Complete	100	DTR (medium-confidence)	0	1.1		1	33.33	265	96.46
YJr2-k141_48838	Genomoviridae	2052	3.31218	56.6	53.33	51.07	2	1	0	High-quality	100	AAI-based (medium-confidence)	0	1		1	50	88	49.81
YJr2-k141_43465	Unclassified Virus	2410	3.38202	26.9	44.03	48.34	2	2	0	High-quality	100	AAI-based (medium-confidence)	0	1		1	50	210	56.49
YJr2-k141_38532	Unclassified Virus	1667	3.22194	33.3	52.56	45.17	2	1	0	High-quality	97.78	AAI-based (medium-confidence)	0	1		1	50	195	64.93
YJr2-k141_38208	Unclassified Virus	1942	3.28825	26.3	54.26	42.95	3	2	0	Complete	100	DTR (high-confidence)	0	1.1		1	33.33	280	73.64
YJr2-k141_33511	Unclassified Virus	3366	3.52711	23.8	27.2	42.57	4	4	0	High-quality	100	AAI-based (high-confidence)	0	1	contig >1.5x longer than expected genome length	1	25	260	61.88
YJr2-k141_32467	Unclassified Virus	3168	3.50079	24.2	31.13	44.89	4	1	0	High-quality	100	AAI-based (medium-confidence)	0	1		1	25	287	69.45
YJr2-k141_28666	Unclassified Virus	1868	3.27138	27.2	89.04	42.99	2	1	0	Complete	100	DTR (medium-confidence)	0	1.1		1	50	268	72.9
YJr2-k141_22925	Unclassified Virus	2170	3.33646	51.5	31.58	50.09	3	1	0	High-quality	100	AAI-based (medium-confidence)	0	1		1	33.33	186	95.79
YJr2-k141_21866	Unclassified Virus	1682	3.22583	29.8	39.52	54.46	3	2	0	Complete	100	DTR (high-confidence)	0	1.1		1	33.33	181	53.94
YJr2-k141_20599	Unclassified Virus	2430	3.38561	30.5	31.78	36.01	3	3	0	High-quality	97.42	HMM-based (lower-bound)	0	1		1	33.33	170	51.85
YJr2-k141_17687	Unclassified Virus	1819	3.25983	35.9	100	46.18	2	2	0	Complete	100	DTR (high-confidence)	0	1.1		2	100	382	137.14
YJr2-k141_17543	Circoviridae	1627	3.21139	41.3	39.44	52.43	3	1	0	High-quality	91.37	AAI-based (medium-confidence)	0	1		1	33.33	127	52.45
YJr1-k141_99972	Unclassified Virus	1924	3.28421	33.7	35.42	48.86	3	1	0	Complete	100	DTR (high-confidence)	0	1.1		1	33.33	181	61
YJr1-k141_98695	Unclassified Virus	1980	3.29667	35.7	44.56	45.51	2	1	0	Complete	100	DTR (high-confidence)	0	1.1		1	50	209	74.61
YJr1-k141_96836	Unclassified Virus	1872	3.27231	46.7	16.29	43.22	3	3	0	Complete	100	DTR (medium-confidence)	0	1.1		1	33.33	86	40.16
YJr1-k141_96428	Unclassified Virus	2248	3.3518	26.2	39.91	37.81	3	0	0	High-quality	100	AAI-based (high-confidence)	0	1	no viral genes detected	1	33.33	255	66.81
YJr1-k141_92537	Unclassified Virus	1987	3.2982	23.9	61.23	57.83	4	1	0	High-quality	93.3	HMM-based (lower-bound)	0	1.1		1	25	259	61.9
YJr1-k141_90386	Unclassified Virus	1914	3.28194	25.9	46.67	50.78	3	2	0	Complete	100	DTR (medium-confidence)	0	1.1		1	33.33	245	63.45
YJr1-k141_89168	Unclassified Virus	1906	3.28012	29.2	20.96	43.28	3	3	0	High-quality	94.09	AAI-based (medium-confidence)	0	1		1	33.33	135	39.42
YJr1-k141_86091	Unclassified Virus	2061	3.31408	27.8	56.07	45.12	2	1	0	Complete	100	DTR (high-confidence)	0	1.1		1	50	291	80.9
YJr1-k141_83831	Unclassified Virus	1760	3.24551	43.2	38.09	43.75	3	2	0	High-quality	100	AAI-based (medium-confidence)	0	1		1	33.33	187	80.78
YJr1-k141_83412	Unclassified Virus	2058	3.31345	27	54.95	46.55	2	1	0	Complete	100	DTR (high-confidence)	0	1.1		1	50	311	83.97
YJr1-k141_83229	Unclassified Virus	1888	3.276	25.6	41.77	44.86	3	1	0	Complete	100	DTR (medium-confidence)	0	1.1		1	33.33	264	67.58
YJr1-k141_8303	Unclassified Virus	1920	3.2833	27.2	53.67	46.51	3	1	0	Complete	100	DTR (high-confidence)	0	1.1		1	33.33	285	77.52
YJr1-k141_80902	Unclassified Virus	1994	3.29973	35.6	40.71	42.88	3	2	0	High-quality	100	AAI-based (medium-confidence)	0	1		1	33.33	217	77.25
YJr1-k141_73715	Genomoviridae	2285	3.35889	33.3	13.32	49.85	5	2	0	Complete	100	DTR (high-confidence)	0	1.1		1	20	97	32.3
YJr1-k141_69900	Unclassified Virus	1677	3.22453	50.4	43.02	54.86	3	2	0	Complete	100	DTR (high-confidence)	0	1.1		1	33.33	185	93.24
YJr1-k141_67630	Unknown	2399	3.38003	27.2	41.86	41.52	3	2	0	High-quality	100	HMM-based (lower-bound)	0	1		1	33.33	252	68.54
YJr1-k141_65560	Unclassified Virus	1760	3.24551	26.8	44.59	45.11	3	2	0	Complete	100	DTR (medium-confidence)	0	1.1		1	33.33	239	64.05
YJr1-k141_61603	Genomoviridae	2099	3.32201	27.3	42.17	48.98	3	1	0	High-quality	91.26	HMM-based (lower-bound)	0	1		1	33.33	264	72.07
YJr1-k141_60677	Unclassified Virus	1691	3.22814	28.2	50.63	44.77	3	1	0	Complete	100	DTR (medium-confidence)	0	1		1	33.33	240	67.68
YJr1-k141_57105	Unclassified Virus	2499	3.39777	27.6	30.54	45.78	3	3	0	High-quality	100	AAI-based (high-confidence)	0	1		1	33.33	193	53.27
YJr1-k141_57040	Circoviridae	1833	3.26316	24.5	41.65	48.06	3	2	0	Complete	100	DTR (high-confidence)	0	1.1		1	33.33	212	51.94
YJr1-k141_55439	Unclassified Virus	1972	3.29491	23.6	36.36	49.49	3	2	0	Complete	100	DTR (high-confidence)	0	1.1		1	33.33	200	47.2
YJr1-k141_54671	Unclassified Virus	2425	3.38471	39.8	14.68	54.47	3	3	0	Complete	100	DTR (high-confidence)	0	1.1		1	33.33	113	44.97
YJr1-k141_5066	Unclassified Virus	1601	3.20439	27.7	39.84	44.16	2	2	0	High-quality	93.89	AAI-based (medium-confidence)	0	1		1	50	200	55.4
YJr1-k141_4880	Unclassified Virus	1605	3.20548	32.2	45.77	49.41	2	2	0	Complete	100	DTR (medium-confidence)	0	1.1		1	50	173	55.71
YJr1-k141_48475	Unknown	2134	3.32919	34.9	37.48	42.46	3	1	0	High-quality	100	HMM-based (lower-bound)	0	1		1	33.33	226	78.87
YJr1-k141_48117	Circoviridae	2829	3.45163	34.4	15.12	48.32	4	3	0	High-quality	98.06	HMM-based (lower-bound)	0	1		1	25	116	39.9
YJr1-k141_46480	Unclassified Virus	1644	3.2159	39.5	44.18	47.93	3	1	0	High-quality	95.51	AAI-based (medium-confidence)	0	1		1	33.33	243	95.98
YJr1-k141_44283	Unclassified Virus	3146	3.49776	33.8	23.15	42.47	5	2	0	High-quality	100	HMM-based (lower-bound)	0	1		1	20	213	71.99
YJr1-k141_42513	Unclassified Virus	2381	3.37676	36.2	39.43	42.04	4	0	0	Complete	100	DTR (high-confidence)	0	1.1	no viral genes detected	1	25	237	85.79
YJr1-k141_38384	Unclassified Virus	1741	3.2408	26	46.78	43.6	2	2	0	Complete	100	DTR (medium-confidence)	0	1.1		1	50	225	58.5
YJr1-k141_36724	Unclassified Virus	2947	3.46938	24.9	32.47	44.32	4	2	0	High-quality	100	HMM-based (lower-bound)	0	1		1	25	262	65.24
YJr1-k141_36539	Unclassified Virus	1989	3.29863	23.1	53	43.39	2	1	0	Complete	100	DTR (high-confidence)	0	1.1		1	50	274	63.29
YJr1-k141_3485	Unclassified Virus	3200	3.50515	23.7	36.65	43.84	4	4	0	High-quality	100	AAI-based (medium-confidence)	0	1	contig >1.5x longer than expected genome length	1	25	339	80.34
YJr1-k141_32494	Unknown	2300	3.36173	24.5	26.91	44.13	3	3	0	Complete	100	DTR (medium-confidence)	0	1.1		1	33.33	176	43.12
YJr1-k141_31351	Unclassified Virus	5484	3.7391	29.3	36.76	36.69	3	2	0	High-quality	100	AAI-based (medium-confidence)	0	1	contig >1.5x longer than expected genome length	1	33.33	218	63.87
YJr1-k141_2932	Unclassified Virus	2225	3.34733	0	0	37.66	2	1	0	High-quality	93.73	HMM-based (lower-bound)	0	1
YJr1-k141_27920	Unclassified Virus	2226	3.34753	24.9	46.72	42.36	3	1	0	High-quality	100	HMM-based (lower-bound)	0	1		1	33.33	285	70.97
YJr1-k141_2648	Unclassified Virus	4104	3.61321	40.8	5.67	50.32	6	0	0	High-quality	100	AAI-based (high-confidence)	0	1	no viral genes detected; contig >1.5x longer than expected genome length	1	16.67	65	26.52
YJr1-k141_25539	Unclassified Virus	1851	3.26741	38.1	52.92	48.19	3	2	0	High-quality	100	AAI-based (medium-confidence)	0	1		1	33.33	254	96.77
YJr1-k141_253687	Unclassified Virus	1825	3.26126	28.6	44.04	43.62	3	1	0	Complete	100	DTR (medium-confidence)	0	1.1		1	33.33	240	68.64
YJr1-k141_253525	Circoviridae	1902	3.27921	39.8	15.58	45.11	3	3	0	Complete	100	DTR (high-confidence)	0	1.1		1	33.33	88	35.02
YJr1-k141_253508	Unclassified Virus	1645	3.21617	38.8	48.34	50.21	3	1	0	Complete	100	DTR (high-confidence)	0	1.1		1	33.33	218	84.58
YJr1-k141_253208	Unclassified Virus	1843	3.26553	31.4	39.49	50.19	3	2	0	Complete	100	DTR (medium-confidence)	0	1.1		1	33.33	216	67.82
YJr1-k141_253145	Unclassified Virus	1829	3.26221	43.8	20.66	54.24	3	1	0	Complete	100	DTR (medium-confidence)	0	1.1		1	33.33	106	46.43
YJr1-k141_253118	Unclassified Virus	1674	3.22376	43.6	50.34	50.6	2	1	0	Complete	100	DTR (high-confidence)	0	1.1		1	50	220	95.92
YJr1-k141_253073	Unclassified Virus	1824	3.26102	26	41.37	49.4	3	1	0	Complete	100	DTR (medium-confidence)	0	1.1		1	33.33	218	56.68
YJr1-k141_252949	Unclassified Virus	1892	3.27692	30.5	57.77	42.12	3	1	0	Complete	100	DTR (high-confidence)	0	1.1		1	33.33	331	100.95
YJr1-k141_252885	Unclassified Virus	2020	3.30535	51.2	41.19	44.8	2	1	0	Complete	100	DTR (high-confidence)	0	1.1		1	50	208	106.5
YJr1-k141_252833	Unclassified Virus	2037	3.30899	28.4	38.37	42.51	3	1	0	Complete	100	DTR (high-confidence)	0	1.1		1	33.33	216	61.34
YJr1-k141_252753	Circoviridae	1999	3.30081	23.8	58.66	50.73	2	2	0	Complete	100	DTR (high-confidence)	0	1.1		1	50	271	64.5
YJr1-k141_252698	Unclassified Virus	2304	3.36248	33.3	15.58	53.69	4	1	0	Complete	100	DTR (high-confidence)	0	1.1		1	25	100	33.3
YJr1-k141_252645	Unclassified Virus	1742	3.24105	0	0	52.18	2	1	0	Complete	100	DTR (medium-confidence)	0	1.1
YJr1-k141_252606	Unclassified Virus	2179	3.33826	25.5	29.52	41.21	3	3	0	Complete	100	DTR (medium-confidence)	0	1.1		1	33.33	191	48.7
YJr1-k141_252509	Unclassified Virus	1817	3.25935	31.2	49.09	50.96	3	2	0	Complete	100	DTR (high-confidence)	0	1.1		1	33.33	244	76.13
YJr1-k141_252501	Unclassified Virus	1867	3.27114	25.3	50.36	40.6	3	1	0	Complete	100	DTR (medium-confidence)	0	1.1		1	33.33	283	71.6
YJr1-k141_252474	Unclassified Virus	1849	3.26694	29.5	27.94	44.19	3	2	0	Complete	100	DTR (medium-confidence)	0	1.1		1	33.33	152	44.84
YJr1-k141_252466	Unclassified Virus	1699	3.23019	35.1	35.54	41.61	3	2	0	Complete	100	DTR (high-confidence)	0	1.1		1	33.33	161	56.51
YJr1-k141_252454	Unclassified Virus	1925	3.28443	36.4	37.33	54.55	2	2	0	Complete	100	DTR (high-confidence)	0	1.1		1	50	162	58.97
YJr1-k141_252259	Genomoviridae	2250	3.35218	26	40.79	51.82	3	2	0	Complete	100	DTR (high-confidence)	0	1.1		1	33.33	217	56.42
YJr1-k141_252246	Unclassified Virus	1609	3.20656	40.2	44.81	40.4	3	1	0	Complete	100	DTR (high-confidence)	0	1.1		1	33.33	220	88.44
YJr1-k141_252185	Unclassified Virus	1976	3.29579	37.1	48.19	46.71	3	1	0	Complete	100	DTR (high-confidence)	0	1.1		1	33.33	267	99.06
YJr1-k141_252087	Circoviridae	2025	3.30643	36.7	48.19	44.1	2	2	0	Complete	100	DTR (high-confidence)	0	1.1		1	50	240	88.08
YJr1-k141_252060	Unclassified Virus	1672	3.22324	54.7	34.56	41.39	3	1	0	Complete	100	DTR (high-confidence)	0	1.1		1	33.33	169	92.44
YJr1-k141_251811	Unclassified Virus	1937	3.28713	35.6	14.24	48.12	4	2	0	Complete	100	DTR (high-confidence)	0	1.1		1	25	97	34.53
YJr1-k141_251804	Unclassified Virus	1728	3.23754	28.2	48.88	39.06	3	2	0	Complete	100	DTR (high-confidence)	0	1.1		1	33.33	240	67.68
YJr1-k141_251739	Unclassified Virus	2402	3.38057	25.2	41.46	51.54	3	2	0	Complete	100	DTR (high-confidence)	0	1.1		1	33.33	284	71.57
YJr1-k141_251721	Unclassified Virus	1973	3.29513	35.8	43.67	46.33	3	2	0	Complete	100	DTR (high-confidence)	0	1.1		1	33.33	238	85.2
YJr1-k141_251630	Unclassified Virus	1810	3.25768	0	0	46.3	3	2	0	Complete	100	DTR (medium-confidence)	0	1.1
YJr1-k141_251571	Unclassified Virus	2078	3.31765	28.4	53.52	41.29	3	1	0	Complete	100	DTR (high-confidence)	0	1.1		1	33.33	281	79.8
YJr1-k141_251564	Unclassified Virus	1836	3.26387	24.4	58.26	31.54	2	1	0	Complete	100	DTR (medium-confidence)	0	1.1		1	50	268	65.39
YJr1-k141_251409	Unclassified Virus	1978	3.29623	27.2	53.28	41.86	3	1	0	Complete	100	DTR (high-confidence)	0	1.1		1	33.33	284	77.25
YJr1-k141_251252	Unknown	2247	3.3516	54.2	37.14	52.11	3	1	0	Complete	100	DTR (high-confidence)	0	1.1		1	33.33	221	119.78
YJr1-k141_251198	Unclassified Virus	1650	3.21748	43.4	48.03	45.58	2	2	0	Complete	100	DTR (high-confidence)	0	1.1		1	50	207	89.84
YJr1-k141_251193	Unclassified Virus	1613	3.20763	27.5	43.1	42.41	2	2	0	Complete	100	DTR (high-confidence)	0	1.1		1	50	178	48.95
YJr1-k141_251171	Unclassified Virus	1824	3.26102	39.8	41.76	46.93	3	3	0	Complete	100	DTR (high-confidence)	0	1.1		1	33.33	228	90.74
YJr1-k141_250894	Unclassified Virus	1996	3.30016	42.7	29.57	41.03	4	2	0	Complete	100	DTR (medium-confidence)	0	1.1		1	25	76	32.45
YJr1-k141_250706	Unclassified Virus	1762	3.24601	23.2	45.98	45.18	3	2	0	Complete	100	DTR (high-confidence)	0	1.1		1	33.33	246	57.07
YJr1-k141_250658	Unclassified Virus	1849	3.26694	25.5	49.77	44.67	2	2	0	Complete	100	DTR (medium-confidence)	0	1.1		1	50	221	56.35
YJr1-k141_250655	Unclassified Virus	1785	3.25164	0	0	38.38	3	2	0	Complete	100	DTR (medium-confidence)	0	1.1
YJr1-k141_250580	Circoviridae	2071	3.31618	23.9	47.95	43.65	3	2	0	Complete	100	DTR (high-confidence)	0	1.1		1	33.33	304	72.66
YJr1-k141_250571	Unclassified Virus	1666	3.22167	44.5	48.73	48.68	3	1	0	Complete	100	DTR (high-confidence)	0	1.1		1	33.33	230	102.35
YJr1-k141_250536	Unclassified Virus	1818	3.25959	0	0	45.05	3	1	0	Complete	100	DTR (medium-confidence)	0	1.1
YJr1-k141_250530	Unclassified Virus	2066	3.31513	26.7	42.55	40.61	3	3	0	Complete	100	DTR (high-confidence)	0	1.1		1	33.33	254	67.82
YJr1-k141_250514	Unclassified Virus	2036	3.30878	0	0	43.52	3	2	0	Complete	100	DTR (high-confidence)	0	1.1
YJr1-k141_250494	Unclassified Virus	2016	3.30449	27	60.87	48.61	2	1	0	Complete	100	DTR (high-confidence)	0	1.1		1	50	280	75.6
YJr1-k141_250490	Unclassified Virus	2062	3.31429	27.3	53.75	44.28	3	1	0	Complete	100	DTR (high-confidence)	0	1.1		1	33.33	287	78.35
YJr1-k141_250437	Unclassified Virus	1807	3.25696	30.8	44.03	52.52	2	2	0	Complete	100	DTR (high-confidence)	0	1.1		1	50	203	62.52
YJr1-k141_250401	Unclassified Virus	1998	3.3006	30.7	39.41	38.99	3	1	0	Complete	100	DTR (high-confidence)	0	1.1		1	33.33	214	65.7
YJr1-k141_250394	Unclassified Virus	1875	3.273	27.9	48.34	53.07	2	2	0	Complete	100	DTR (high-confidence)	0	1.1		1	50	233	65.01
YJr1-k141_250356	Unclassified Virus	2074	3.31681	26.8	22.62	40.26	3	3	0	Complete	100	DTR (high-confidence)	0	1.1		1	33.33	138	36.98
YJr1-k141_250346	Unknown	1981	3.29688	32.9	40.04	49.07	3	1	0	Complete	100	DTR (high-confidence)	0	1.1		1	33.33	225	74.03
YJr1-k141_250330	Circoviridae	2108	3.32387	0	0	50.85	3	1	0	Complete	100	DTR (medium-confidence)	0	1.1
YJr1-k141_250239	Unclassified Virus	1740	3.24055	37	51.36	48.91	3	2	0	Complete	100	DTR (high-confidence)	0	1.1		1	33.33	246	91.02
YJr1-k141_250208	Unclassified Virus	2059	3.31366	30.8	27.98	30.94	3	2	0	Complete	100	DTR (medium-confidence)	0	1.1		1	33.33	141	43.43
YJr1-k141_250163	Unknown	2302	3.36211	25.1	44.76	42.57	2	2	0	Complete	100	DTR (medium-confidence)	0	1.1		1	50	265	66.52
YJr1-k141_250127	Genomoviridae	2438	3.38703	32.4	27.89	52.95	3	2	0	Complete	100	DTR (high-confidence)	0	1.1		1	33.33	140	45.36
YJr1-k141_250026	Unclassified Virus	2495	3.39707	34.4	20.5	51.06	4	3	0	Complete	100	DTR (high-confidence)	0	1.1		1	25	130	44.72
YJr1-k141_249985	Unclassified Virus	2021	3.30557	58.3	39.67	39.88	3	2	0	Complete	100	DTR (high-confidence)	0	1.1		1	33.33	219	127.68
YJr1-k141_249946	Unclassified Virus	2314	3.36436	26	51.93	37.21	3	0	0	Complete	100	DTR (high-confidence)	0	1.1	no viral genes detected	1	33.33	296	76.96
YJr1-k141_249908	Circoviridae	1730	3.23805	26.8	47.44	33.82	3	1	0	Complete	100	DTR (medium-confidence)	0	1.1		1	33.33	222	59.5
YJr1-k141_249903	Unclassified Virus	1662	3.22063	38.1	46.55	49.88	3	2	0	Complete	100	DTR (high-confidence)	0	1.1		1	33.33	216	82.3
YJr1-k141_249900	Unclassified Virus	1893	3.27715	23.6	48.56	43.16	2	1	0	Complete	100	DTR (medium-confidence)	0	1.1		1	50	287	67.73
YJr1-k141_249877	Unclassified Virus	1781	3.25066	25	44	40.48	3	1	0	Complete	100	DTR (medium-confidence)	0	1.1		1	33.33	231	57.75
YJr1-k141_249858	Unknown	2045	3.31069	27	53.73	45.62	3	1	0	Complete	100	DTR (high-confidence)	0	1.1		1	33.33	295	79.65
YJr1-k141_249855	Genomoviridae	2336	3.36847	32.1	19.13	52.05	4	3	0	Complete	100	DTR (high-confidence)	0	1.1		1	25	127	40.77
YJr1-k141_249836	Unclassified Virus	2036	3.30878	41.8	20.69	50.39	4	1	0	Complete	100	DTR (high-confidence)	0	1.1		1	25	144	60.19
YJr1-k141_249833	Unknown	2368	3.37438	28.8	27.31	56.97	3	3	0	Complete	100	DTR (medium-confidence)	0	1.1		1	33.33	180	51.84
YJr1-k141_249820	Genomoviridae	2316	3.36474	37.3	15.42	51.55	5	3	0	Complete	100	DTR (high-confidence)	0	1.1		1	20	107	39.91
YJr1-k141_249778	Unclassified Virus	1845	3.266	0	0	44.5	2	1	0	Complete	100	DTR (medium-confidence)	0	1.1
YJr1-k141_249776	Unclassified Virus	2122	3.32675	44.8	33.66	45.9	3	3	0	Complete	100	DTR (high-confidence)	0	1.1		1	33.33	205	91.84
YJr1-k141_249709	Unclassified Virus	1896	3.27784	33.8	46.2	47.26	3	2	0	Complete	100	DTR (high-confidence)	0	1.1		1	33.33	255	86.19
YJr1-k141_249708	Unclassified Virus	2037	3.30899	28.7	30.1	45.8	3	1	0	Complete	100	DTR (high-confidence)	0	1.1		1	33.33	158	45.35
YJr1-k141_249671	Unknown	2401	3.38039	23.7	38.92	43.32	3	3	0	Complete	100	DTR (high-confidence)	0	1.1		1	33.33	267	63.28
YJr1-k141_249637	Unclassified Virus	1770	3.24797	49.4	44.09	47.18	3	2	0	Complete	100	DTR (high-confidence)	0	1.1		1	33.33	220	108.68
YJr1-k141_249616	Unclassified Virus	1745	3.2418	28.7	37.54	44.87	4	2	0	Complete	100	DTR (medium-confidence)	0	1.1		1	25	214	61.42
YJr1-k141_249596	Unclassified Virus	1902	3.27921	34.8	19.89	40.75	3	3	0	Complete	100	DTR (medium-confidence)	0	1.1		1	33.33	113	39.32
YJr1-k141_249589	Circoviridae	1812	3.25816	27.6	50.33	35.93	3	1	0	Complete	100	DTR (high-confidence)	0	1.1		1	33.33	231	63.76
YJr1-k141_249540	Unknown	1934	3.28646	0	0	46.48	3	1	0	Complete	100	DTR (high-confidence)	0	1.1
YJr1-k141_249537	Unknown	3001	3.47727	24.4	31.99	42.39	3	1	0	Complete	100	DTR (high-confidence)	0	1		1	33.33	269	65.64
YJr1-k141_249520	Unclassified Virus	2001	3.30125	25.3	51.02	41.53	3	1	0	Complete	100	DTR (high-confidence)	0	1.1		1	33.33	276	69.83
YJr1-k141_249493	Unclassified Virus	1638	3.21431	36.1	42.33	39.26	3	2	0	Complete	100	DTR (high-confidence)	0	1.1		1	33.33	207	74.73
YJr1-k141_249335	Unclassified Virus	1901	3.27898	41.1	36.04	48.45	3	1	0	Complete	100	DTR (high-confidence)	0	1.1		1	33.33	182	74.8
YJr1-k141_248695	Unclassified Virus	2093	3.32077	28.1	43.72	44.58	2	2	0	High-quality	96.92	HMM-based (lower-bound)	0	1		1	50	209	58.73
YJr1-k141_248596	Unclassified Virus	2030	3.3075	26.9	53.64	46.11	3	1	0	Complete	100	DTR (high-confidence)	0	1.1		1	33.33	280	75.32
YJr1-k141_246412	Unclassified Virus	1913	3.28171	28.3	48.29	40.09	3	1	0	Complete	100	DTR (medium-confidence)	0	1.1		1	33.33	254	71.88
YJr1-k141_245526	Genomoviridae	3607	3.55715	24	23.28	55.78	6	3	0	High-quality	100	AAI-based (high-confidence)	0	1	contig >1.5x longer than expected genome length	1	16.67	196	47.04
YJr1-k141_245476	Unclassified Virus	3207	3.5061	0	0	44.56	3	2	0	High-quality	100	HMM-based (lower-bound)	0	1
YJr1-k141_239854	Circoviridae	1982	3.2971	27.6	28.52	49.85	3	2	0	High-quality	98.95	AAI-based (high-confidence)	0	1		1	33.33	158	43.61
YJr1-k141_238701	Unclassified Virus	3880	3.58883	25.6	23.83	45.05	6	3	0	High-quality	99.73	HMM-based (lower-bound)	0	1		1	16.67	275	70.4
YJr1-k141_2386	Unknown	1851	3.26741	25	46.21	39.44	4	1	0	Complete	100	DTR (high-confidence)	0	1.1		1	25	250	62.5
YJr1-k141_236478	Unclassified Virus	1814	3.25864	0	0	45.48	3	1	0	Complete	100	DTR (medium-confidence)	0	1.1
YJr1-k141_236069	Unclassified Virus	1650	3.21748	45.2	38.1	52.18	3	2	0	Complete	100	DTR (high-confidence)	0	1.1		1	33.33	197	89.04
YJr1-k141_234062	Unclassified Virus	3021	3.48015	0	0	42.47	4	1	0	High-quality	100	HMM-based (lower-bound)	0	1
YJr1-k141_2332	Riboviria	3650	3.56229	45.1	48.34	34.63	3	1	0	High-quality	100	AAI-based (medium-confidence)	0	1		1	33.33	510	230.01
YJr1-k141_229727	Unclassified Virus	1846	3.26623	0	0	42.42	3	1	0	Complete	100	DTR (medium-confidence)	0	1.1
YJr1-k141_227738	Unclassified Virus	3291	3.51733	0	0	54.39	4	2	0	High-quality	100	HMM-based (lower-bound)	0	1
YJr1-k141_226539	Unclassified Virus	1735	3.2393	36	49.43	43.11	3	2	0	Complete	100	DTR (high-confidence)	0	1		1	33.33	259	93.24
YJr1-k141_22530	Unclassified Virus	1631	3.21245	31.3	49.45	43.84	2	1	0	High-quality	95.4	AAI-based (medium-confidence)	0	1		1	50	223	69.8
YJr1-k141_224984	Circoviridae	2116	3.32552	36.8	40.82	46.88	4	2	0	High-quality	100	AAI-based (medium-confidence)	0	1		1	25	260	95.68
YJr1-k141_224944	Unclassified Virus	3163	3.5001	40.6	27.55	52.7	5	1	0	High-quality	100	HMM-based (lower-bound)	0	1		1	20	238	96.63
YJr1-k141_224866	Unclassified Virus	2065	3.31492	28.8	54.91	47.36	2	1	0	High-quality	96.96	HMM-based (lower-bound)	0	1		1	50	263	75.74
YJr1-k141_222734	Unclassified Virus	2050	3.31175	35.2	31.46	44.73	3	2	0	High-quality	97.47	AAI-based (medium-confidence)	0	1		1	33.33	162	57.02
YJr1-k141_222463	Unclassified Virus	1724	3.23654	29	41.63	44.55	3	3	0	Complete	100	DTR (high-confidence)	0	1.1		1	33.33	219	63.51
YJr1-k141_222431	Unclassified Virus	1832	3.26293	29.6	40.78	40.34	3	2	0	Complete	100	DTR (medium-confidence)	0	1.1		1	33.33	219	64.82
YJr1-k141_221281	Unclassified Virus	2028	3.30707	30.4	43.79	47.24	3	1	0	Complete	100	DTR (high-confidence)	0	1.1		1	33.33	282	85.73
YJr1-k141_219914	Unknown	2100	3.32222	0	0	40.9	3	1	0	Complete	100	DTR (high-confidence)	0	1.1
YJr1-k141_219156	Unknown	2383	3.37712	0	0	42.51	3	1	0	High-quality	92.38	HMM-based (lower-bound)	0	1.05
YJr1-k141_218203	Unclassified Virus	2914	3.46449	32.4	22.17	32.5	4	4	0	High-quality	98.18	HMM-based (lower-bound)	0	1		1	25	155	50.22
YJr1-k141_213938	Genomoviridae	3405	3.53212	40	10.12	49.37	4	3	0	High-quality	100	AAI-based (high-confidence)	0	1	contig >1.5x longer than expected genome length	1	25	92	36.8
YJr1-k141_21338	Unknown	2689	3.42959	0	0	42.95	4	1	0	High-quality	100	HMM-based (lower-bound)	0	1
YJr1-k141_211490	Circoviridae	1568	3.19535	30.5	37.76	30.23	3	1	0	Complete	100	DTR (high-confidence)	0	1.1		1	33.33	148	45.14
YJr1-k141_210156	Unclassified Virus	1907	3.28035	30.8	31.35	45.36	3	3	0	Complete	100	DTR (medium-confidence)	0	1.1		1	33.33	169	52.05
YJr1-k141_202298	Unclassified Virus	3628	3.55967	34.5	14.47	36.33	4	4	0	High-quality	99.21	HMM-based (lower-bound)	0	1		1	25	124	42.78
YJr1-k141_200572	Unclassified Virus	2281	3.35813	24.4	45.07	43.14	2	2	0	Complete	100	DTR (medium-confidence)	0	1.1		1	50	265	64.66
YJr1-k141_194097	Unclassified Virus	2179	3.33826	23.9	54.91	34.88	2	2	0	Complete	100	DTR (high-confidence)	0	1.1		1	50	313	74.81
YJr1-k141_193500	Genomoviridae	5297	3.72403	50.7	5.14	48.86	9	5	0	High-quality	100	AAI-based (high-confidence)	0	1	contig >1.5x longer than expected genome length	1	11.11	68	34.48
YJr1-k141_189465	Unclassified Virus	4340	3.63749	30.9	16.78	51.5	5	4	0	High-quality	100	AAI-based (high-confidence)	0	1	contig >1.5x longer than expected genome length	1	20	177	54.69
YJr1-k141_189073	Unclassified Virus	3491	3.54295	33.8	27.44	47.75	5	3	0	High-quality	99.02	HMM-based (lower-bound)	0	1		1	20	242	81.8
YJr1-k141_18865	Unclassified Virus	1951	3.29026	35.8	55.63	56.07	3	2	0	High-quality	100	AAI-based (medium-confidence)	0	1		1	33.33	326	116.71
YJr1-k141_188030	Unclassified Virus	1541	3.1878	39.6	48.16	48.99	3	3	0	Complete	100	DTR (medium-confidence)	0	1.1		1	33.33	223	88.31
YJr1-k141_187426	Unclassified Virus	1963	3.29292	24.8	51.89	44.98	2	2	0	High-quality	92.01	HMM-based (lower-bound)	0	1		1	50	289	71.67
YJr1-k141_185611	Unknown	2498	3.39759	23.7	39.53	42.11	3	1	0	High-quality	100	AAI-based (medium-confidence)	0	1		1	33.33	285	67.55
YJr1-k141_184752	Unclassified Virus	2222	3.34674	25.7	45.88	35.51	3	3	0	High-quality	97.08	AAI-based (medium-confidence)	0	1.1		1	33.33	262	67.33
YJr1-k141_183413	Unclassified Virus	2025	3.30643	26.6	53.22	40.2	2	1	0	High-quality	95.08	HMM-based (lower-bound)	0	1.05		1	50	256	68.1
YJr1-k141_183359	Unclassified Virus	1608	3.20629	31.4	41.06	52.43	3	0	0	High-quality	93.61	AAI-based (medium-confidence)	0	1	no viral genes detected	1	33.33	170	53.38
YJr1-k141_180466	Unclassified Virus	1869	3.27161	30.6	54.14	46.12	2	2	0	Complete	100	DTR (medium-confidence)	0	1.1		1	50	281	85.99
YJr1-k141_180101	Unclassified Virus	2033	3.30814	26.1	33.15	53.86	3	1	0	Complete	100	DTR (high-confidence)	0	1.1		1	33.33	176	45.94
YJr1-k141_179478	Unclassified Virus	1706	3.23198	25	43.49	50.47	3	1	0	Complete	100	DTR (high-confidence)	0	1.1		1	33.33	217	54.25
YJr1-k141_177468	Unclassified Virus	1838	3.26435	30.8	37.86	46.63	3	2	0	Complete	100	DTR (high-confidence)	0	1.1		1	33.33	209	64.37
YJr1-k141_175685	Unclassified Virus	1937	3.28713	34.5	26.94	35.88	3	3	0	High-quality	90.79	HMM-based (lower-bound)	0	1		1	33.33	139	47.95
YJr1-k141_175508	Unclassified Virus	1825	3.26126	25.3	48.95	47.18	3	1	0	Complete	100	DTR (medium-confidence)	0	1.1		1	33.33	233	58.95
YJr1-k141_172795	Genomoviridae	2727	3.43569	34	16.94	46.09	5	3	0	High-quality	99.72	HMM-based (lower-bound)	0	1		1	20	126	42.84
YJr1-k141_171723	Unclassified Virus	1983	3.29732	28.9	56.02	47	2	1	0	High-quality	100	AAI-based (medium-confidence)	0	1		1	50	284	82.08
YJr1-k141_171277	Unclassified Virus	3704	3.56867	23.2	30.09	43.63	5	4	0	High-quality	100	AAI-based (medium-confidence)	0	1	contig >1.5x longer than expected genome length	1	20	306	70.99
YJr1-k141_169377	Unclassified Virus	3303	3.51891	24.1	25.79	44.32	5	3	0	High-quality	98.83	HMM-based (lower-bound)	0	1		1	20	205	49.41
YJr1-k141_167709	Circoviridae	3433	3.53567	25.5	39.95	52.2	4	2	0	Complete	100	DTR (high-confidence)	0	1		1	25	316	80.58
YJr1-k141_16749	Unclassified Virus	1833	3.26316	35.9	47.99	49.7	4	1	0	Complete	100	DTR (high-confidence)	0	1.1		1	25	262	94.06
YJr1-k141_166857	Circoviridae	2529	3.40295	21.2	56.82	49.62	3	2	0	High-quality	95.77	HMM-based (lower-bound)	0	1		1	33.33	383	81.2
YJr1-k141_166552	Unclassified Virus	2024	3.30621	53.6	42.56	42.79	3	1	0	High-quality	100	AAI-based (medium-confidence)	0	1		1	33.33	266	142.58
YJr1-k141_165605	Unclassified Virus	1871	3.27207	27.2	55.46	49.17	2	1	0	Complete	100	DTR (medium-confidence)	0	1.1		1	50	269	73.17
YJr1-k141_161745	Unclassified Virus	3116	3.4936	0	0	34.69	3	1	0	High-quality	98.64	HMM-based (lower-bound)	0	1
YJr1-k141_159693	Unclassified Virus	1843	3.26553	31.2	39.93	49.21	3	1	0	Complete	100	DTR (medium-confidence)	0	1.1		1	33.33	224	69.89
YJr1-k141_157573	Unclassified Virus	1691	3.22814	35	32.21	53.93	3	1	0	Complete	100	DTR (high-confidence)	0	1.1		1	33.33	144	50.4
YJr1-k141_156948	Unclassified Virus	3330	3.52244	26.5	28.5	45.02	4	4	0	High-quality	100	AAI-based (medium-confidence)	0	1	contig >1.5x longer than expected genome length	1	25	271	71.81
YJr1-k141_155069	Unclassified Virus	2038	3.3092	23.8	41.81	53.93	3	3	0	Complete	100	DTR (high-confidence)	0	1.1		1	33.33	268	63.78
YJr1-k141_151877	Unclassified Virus	2026	3.30664	54.19	46.21	48.42	3	1	0	Complete	100	DTR (high-confidence)	0	1.1		2	66.67	244	132.22
YJr1-k141_15030	Unclassified Virus	2176	3.33766	93.1	37.93	49.86	4	2	0	High-quality	100	AAI-based (high-confidence)	0	1		1	25	245	228.09
YJr1-k141_150021	Unclassified Virus	1854	3.26811	31	50.88	54.26	2	2	0	Complete	100	DTR (high-confidence)	0	1.1		1	50	230	71.3
YJr1-k141_149924	Unknown	1710	3.233	45.5	50	43.27	3	1	0	Complete	100	DTR (high-confidence)	0	1		1	33.33	259	117.84
YJr1-k141_146030	Unclassified Virus	2298	3.36135	50.3	33.95	41.82	3	1	0	Complete	100	DTR (high-confidence)	0	1.1		1	33.33	203	102.11
YJr1-k141_144675	Unclassified Virus	2190	3.34044	25.7	52.1	34.47	3	2	0	Complete	100	DTR (high-confidence)	0	1.1		1	33.33	323	83.01
YJr1-k141_14445	Unknown	2792	3.44592	0	0	45.38	5	2	0	High-quality	100	HMM-based (lower-bound)	0	1
YJr1-k141_142184	Unclassified Virus	1599	3.20385	38.5	66.08	39.46	2	1	0	High-quality	93.04	AAI-based (medium-confidence)	0	1		1	50	226	87.01
YJr1-k141_140879	Genomoviridae	2323	3.36605	32.6	23.22	47.61	5	3	0	Complete	100	DTR (high-confidence)	0	1.1		1	20	176	57.38
YJr1-k141_140088	Unclassified Virus	2116	3.32552	24.2	43.37	49.2	3	3	0	Complete	100	DTR (high-confidence)	0	1.1		1	33.33	278	67.28
YJr1-k141_139827	Circoviridae	1876	3.27323	22.8	53.77	42.64	3	2	0	Complete	100	DTR (high-confidence)	0	1.1		1	33.33	285	64.98
YJr1-k141_13877	Unclassified Virus	2072	3.31639	23.8	61.4	38.47	3	2	0	High-quality	96.89	HMM-based (lower-bound)	0	1		1	33.33	334	79.49
YJr1-k141_137666	Unclassified Virus	1881	3.27439	29.3	32.85	50.88	3	3	0	Complete	100	DTR (high-confidence)	0	1.1		1	33.33	160	46.88
YJr1-k141_134747	Unclassified Virus	5809	3.7641	23.8	13.18	42.26	7	7	0	High-quality	100	AAI-based (high-confidence)	0	1	contig >1.5x longer than expected genome length	1	14.29	225	53.55
YJr1-k141_133071	Unclassified Virus	1990	3.29885	29.5	38.86	43.02	3	2	0	Complete	100	DTR (high-confidence)	0	1.1		1	33.33	218	64.31
YJr1-k141_131850	Circoviridae	4213	3.62459	32.1	11.8	47.64	6	4	0	High-quality	100	AAI-based (medium-confidence)	0	1	contig >1.5x longer than expected genome length	1	16.67	120	38.52
YJr1-k141_131644	Unclassified Virus	1818	3.25959	23	47.05	44.61	2	1	0	Complete	100	DTR (medium-confidence)	0	1.1		1	50	231	53.13
YJr1-k141_131284	Unknown	1828	3.26198	0	0	39.33	3	1	0	Complete	100	DTR (medium-confidence)	0	1.1
YJr1-k141_129861	Unclassified Virus	2209	3.3442	26.8	39.12	40.24	4	1	0	High-quality	100	HMM-based (lower-bound)	0	1		1	25	257	68.88
YJr1-k141_129161	Unclassified Virus	1854	3.26811	31.4	39.29	49.08	3	1	0	Complete	100	DTR (medium-confidence)	0	1.1		1	33.33	209	65.63
YJr1-k141_129130	Unclassified Virus	3148	3.49803	23.4	48.94	45.39	4	2	0	High-quality	99.65	HMM-based (lower-bound)	0	1		1	25	345	80.73
YJr1-k141_121480	Unclassified Virus	1841	3.26505	34.6	34.06	42.04	3	2	0	Complete	100	DTR (high-confidence)	0	1.1		1	33.33	172	59.51
YJr1-k141_119732	Unclassified Virus	1797	3.25455	36.2	32.65	46.08	3	2	0	Complete	100	DTR (high-confidence)	0	1.1		1	33.33	176	63.71
YJr1-k141_117406	Circoviridae	2087	3.31952	45.9	37.86	48.87	3	2	0	Complete	100	DTR (high-confidence)	0	1.1		1	33.33	209	95.93
YJr1-k141_115435	Genomoviridae	2551	3.40671	33.3	13.16	49.31	4	2	0	High-quality	100	AAI-based (high-confidence)	0	1		1	25	97	32.3
YJr1-k141_11446	Riboviria	3240	3.51055	29.3	51.17	36.45	2	1	0	High-quality	90.86	AAI-based (medium-confidence)	0	1		1	50	505	147.97
YJr1-k141_114211	Unclassified Virus	1925	3.28443	26.7	47.41	57.45	4	1	0	Complete	100	DTR (high-confidence)	0	1.1		1	25	256	68.35
YJr1-k141_112552	Unclassified Virus	2017	3.30471	22.4	49.75	38.37	3	2	0	Complete	100	DTR (high-confidence)	0	1.1		1	33.33	303	67.87
YJr1-k141_111120	Unclassified Virus	1907	3.28035	46.3	28.69	47.46	3	1	0	Complete	100	DTR (high-confidence)	0	1		1	33.33	142	65.75
YJr1-k141_108531	Unclassified Virus	1790	3.25285	31.8	42.94	44.86	3	2	0	Complete	100	DTR (high-confidence)	0	1.1		1	33.33	213	67.73
YJr1-k141_107186	Unclassified Virus	2132	3.32879	34.1	56.12	50.23	2	0	0	High-quality	100	AAI-based (medium-confidence)	0	1	no viral genes detected	1	50	211	71.95
YJr1-k141_101418	Unclassified Virus	2011	3.30341	27.4	53.79	47.44	3	1	0	Complete	100	DTR (high-confidence)	0	1.1		1	33.33	284	77.82
YJr1-k141_10084	Unclassified Virus	2276	3.35717	23.1	43.37	43.5	3	2	0	High-quality	96.28	AAI-based (medium-confidence)	0	1		1	33.33	268	61.91
YJd3-k141_113080	Unclassified Virus	3334	3.52297	23.2	35.53	37.31	3	1	0	High-quality	100	AAI-based (high-confidence)	0	1		1	33.33	286	66.35
YJd2-k141_60088	Circoviridae	2208	3.344	30.4	53.42	32.93	3	2	0	High-quality	100	AAI-based (high-confidence)	0	1		1	33.33	289	87.86
YJd2-k141_33599	Unclassified Virus	2960	3.47129	40.8	5.66	41.86	6	0	0	High-quality	93.32	AAI-based (medium-confidence)	0	1	no viral genes detected	1	16.67	56	22.85
YJd2-k141_27552	Unknown	2791	3.44576	31.3	33.89	48.91	4	1	0	High-quality	100	HMM-based (lower-bound)	0	1		1	25	262	82.01
YJd2-k141_170677	Unclassified Virus	2034	3.30835	36.3	38.81	34.12	3	0	0	Complete	100	ITR (high-confidence)	0	1	no viral genes detected	1	33.33	208	75.5
YJd1-k141_97460	Unclassified Virus	2727	3.43569	0	0	47.27	4	2	0	High-quality	100	HMM-based (lower-bound)	0	1
YJd1-k141_94365	Unclassified Virus	1993	3.29951	22.6	66.8	52.38	3	1	0	High-quality	92.82	AAI-based (high-confidence)	0	1		1	33.33	324	73.22
YJd1-k141_88973	Circoviridae	1813	3.2584	43.9	24.18	38.11	4	1	0	High-quality	100	AAI-based (high-confidence)	0	1		1	25	133	58.39
YJd1-k141_86809	Circoviridae	2106	3.32346	24.6	56.08	44.16	3	0	0	Complete	100	DTR (high-confidence)	0	1.1	no viral genes detected	1	33.33	332	81.67
YJd1-k141_86207	Unclassified Virus	2979	3.47407	21.6	56.75	49.95	2	1	0	High-quality	100	AAI-based (high-confidence)	0	1	contig >1.5x longer than expected genome length	1	50	349	75.38
YJd1-k141_86203	Circoviridae	2180	3.33846	33.3	15.93	36.74	3	3	0	Complete	100	DTR (high-confidence)	0	1.1		1	33.33	97	32.3
YJd1-k141_84373	Unknown	2296	3.36097	0	0	40.37	4	1	0	High-quality	96.72	HMM-based (lower-bound)	0	1
YJd1-k141_83392	Circoviridae	2344	3.36996	37.9	51.95	45.05	2	0	0	High-quality	100	AAI-based (medium-confidence)	0	1.05	no viral genes detected	1	50	120	45.48
YJd1-k141_81876	Circoviridae	3921	3.5934	79.6	11.61	41.14	5	1	0	High-quality	94.22	HMM-based (lower-bound)	0	1		1	20	49	39
YJd1-k141_77575	Unclassified Virus	2359	3.37273	32.2	46.89	34.76	3	0	0	High-quality	100	AAI-based (high-confidence)	0	1	no viral genes detected	1	33.33	249	80.18
YJd1-k141_76361	Unclassified Virus	2128	3.32797	23.1	55.04	36.14	3	2	0	High-quality	96.98	HMM-based (lower-bound)	0	1		1	33.33	355	82
YJd1-k141_71905	Unclassified Virus	2110	3.32428	24.1	46.42	31.23	3	1	0	Complete	100	DTR (high-confidence)	0	1.1		1	33.33	292	70.37
YJd1-k141_66415	Unclassified Virus	1812	3.25816	0	0	47.24	3	1	0	Complete	100	DTR (medium-confidence)	0	1.1
YJd1-k141_56913	Unclassified Virus	1888	3.276	27.7	45.36	38.24	2	2	0	Complete	100	DTR (medium-confidence)	0	1.1		1	50	225	62.33
YJd1-k141_45335	Unclassified Virus	1929	3.28533	26.7	53.53	37.79	2	1	0	High-quality	90.57	HMM-based (lower-bound)	0	1		1	50	258	68.89
YJd1-k141_45178	Unclassified Virus	1708	3.23249	34.2	27.27	40.75	3	2	0	High-quality	90.51	AAI-based (medium-confidence)	0	1.05		1	33.33	123	42.07
YJd1-k141_45043	Unknown	2434	3.38632	34.5	45.71	48.56	2	1	0	High-quality	100	HMM-based (lower-bound)	0	1		1	50	245	84.53
YJd1-k141_44731	Unclassified Virus	3536	3.54851	28.1	31.37	37.19	5	0	0	High-quality	100	AAI-based (medium-confidence)	0	1	no viral genes detected; contig >1.5x longer than expected genome length	1	20	303	85.14
YJd1-k141_44633	Unclassified Virus	3614	3.55799	44.4	5.95	42.56	8	1	0	High-quality	100	AAI-based (medium-confidence)	0	1		1	12.5	58	25.75
YJd1-k141_39537	Unclassified Virus	2939	3.4682	23.1	36.2	46.78	3	1	0	High-quality	100	AAI-based (medium-confidence)	0	1		1	33.33	282	65.14
YJd1-k141_39474	Circoviridae	1653	3.21827	25.4	53.33	32	2	1	0	Complete	100	DTR (high-confidence)	0	1.1		1	50	232	58.93
YJd1-k141_37583	Unclassified Virus	2715	3.43377	44.4	10.12	39.71	6	0	0	High-quality	97.85	AAI-based (medium-confidence)	0	1	no viral genes detected	1	16.67	65	28.86
YJd1-k141_374311	Unclassified Virus	1840	3.26482	29.5	31.74	42.72	3	2	0	Complete	100	DTR (medium-confidence)	0	1.1		1	33.33	173	51.03
YJd1-k141_363982	Unclassified Virus	2495	3.39707	24.3	41.87	47.17	3	3	0	Complete	100	DTR (high-confidence)	0	1.1		1	33.33	296	71.93
YJd1-k141_362292	Unclassified Virus	1917	3.28262	28.8	45.73	49.66	4	1	0	Complete	100	DTR (high-confidence)	0	1.1		1	25	289	83.23
YJd1-k141_359335	Unclassified Virus	1811	3.25792	39	45.29	38.6	3	2	0	Complete	100	DTR (high-confidence)	0	1.1		1	33.33	226	88.14
YJd1-k141_355648	Circoviridae	2139	3.33021	24.3	51.43	44.97	3	2	0	Complete	100	DTR (medium-confidence)	0	1.1		1	33.33	306	74.36
YJd1-k141_353350	Unclassified Virus	1666	3.22167	24.1	60.68	40.82	2	2	0	Complete	100	DTR (high-confidence)	0	1.1		1	50	250	60.25
YJd1-k141_351511	Unclassified Virus	2283	3.35851	26.4	32.81	40.43	3	2	0	Complete	100	DTR (high-confidence)	0	1.1		1	33.33	208	54.91
YJd1-k141_35142	Unclassified Virus	1467	3.16643	43.8	65.96	41.04	2	0	0	High-quality	92.79	AAI-based (medium-confidence)	0	1.1	no viral genes detected	1	50	248	108.62
YJd1-k141_350149	Unclassified Virus	1741	3.2408	23.4	49.16	57.78	3	1	0	Complete	100	DTR (medium-confidence)	0	1.1		1	33.33	263	61.54
YJd1-k141_350053	Unclassified Virus	1823	3.26079	39.4	47.57	40.98	2	1	0	Complete	100	DTR (high-confidence)	0	1.1		1	50	225	88.65
YJd1-k141_346979	Unclassified Virus	2622	3.41863	24.2	44.42	42.68	6	0	0	Complete	100	DTR (high-confidence)	0	1.1	no viral genes detected	1	16.67	350	84.7
YJd1-k141_345455	Unclassified Virus	2417	3.38328	25.2	39.34	45.51	3	2	0	Complete	100	DTR (high-confidence)	0	1.1		1	33.33	214	53.93
YJd1-k141_345402	Unclassified Virus	1859	3.26928	25.8	48.94	47.66	2	1	0	Complete	100	DTR (medium-confidence)	0	1.1		1	50	253	65.27
YJd1-k141_344786	Circoviridae	1923	3.28398	29	45.85	31.46	3	1	0	Complete	100	DTR (medium-confidence)	0	1.1		1	33.33	232	67.28
YJd1-k141_344351	Unclassified Virus	1724	3.23654	35.5	47.29	45.07	3	3	0	Complete	100	DTR (high-confidence)	0	1.1		1	33.33	244	86.62
YJd1-k141_343056	Unclassified Virus	1743	3.2413	38.9	57.72	51.12	2	1	0	Complete	100	DTR (high-confidence)	0	1.1		1	50	273	106.2
YJd1-k141_341566	Unclassified Virus	1828	3.26198	25.2	49.72	44.2	3	1	0	Complete	100	DTR (medium-confidence)	0	1.1		1	33.33	262	66.02
YJd1-k141_341329	Unknown	2544	3.40552	24.3	49.39	53.77	3	1	0	Complete	100	DTR (high-confidence)	0	1.1		1	33.33	284	69.01
YJd1-k141_340934	Unclassified Virus	1691	3.22814	30.2	47.47	44.41	3	1	0	Complete	100	DTR (medium-confidence)	0	1.1		1	33.33	216	65.23
YJd1-k141_340145	Unclassified Virus	2135	3.3294	41.01	81.89	39.48	3	3	0	Complete	100	DTR (high-confidence)	0	1.1		2	66.67	538	220.63
YJd1-k141_339182	Unclassified Virus	2083	3.31869	40	21.75	39.51	3	1	0	Complete	100	DTR (high-confidence)	0	1.1		1	33.33	122	48.8
YJd1-k141_338377	Unclassified Virus	2088	3.31973	30.3	36.27	38.84	3	2	0	Complete	100	DTR (high-confidence)	0	1.1		1	33.33	214	64.84
YJd1-k141_336715	Unclassified Virus	1907	3.28035	26.3	42.59	49.34	2	2	0	Complete	100	DTR (medium-confidence)	0	1.1		1	50	207	54.44
YJd1-k141_336700	Unclassified Virus	2594	3.41397	21.8	44.55	35.81	3	3	0	Complete	100	DTR (medium-confidence)	0	1.05		1	33.33	376	81.97
YJd1-k141_335360	Unclassified Virus	1933	3.28623	28.6	43.35	51.78	3	1	0	Complete	100	DTR (high-confidence)	0	1.1		1	33.33	202	57.77
YJd1-k141_335113	Circoviridae	2310	3.36361	27	24.85	40.61	3	3	0	Complete	100	DTR (medium-confidence)	0	1.1		1	33.33	167	45.09
YJd1-k141_334459	Unclassified Virus	1843	3.26553	44.8	33.27	31.25	3	1	0	Complete	100	DTR (high-confidence)	0	1.1		1	33.33	166	74.37
YJd1-k141_332947	Circoviridae	2432	3.38596	25.4	48.25	39.51	3	1	0	Complete	100	DTR (high-confidence)	0	1.1		1	33.33	330	83.82
YJd1-k141_332483	Unclassified Virus	2434	3.38632	40	14.88	51.03	3	2	0	Complete	100	DTR (high-confidence)	0	1.1		1	33.33	96	38.4
YJd1-k141_332403	Unclassified Virus	1850	3.26717	44.4	34.07	49.35	3	2	0	Complete	100	DTR (high-confidence)	0	1.1		1	33.33	170	75.48
YJd1-k141_332380	Unclassified Virus	2222	3.34674	22.5	58.59	47.79	3	2	0	Complete	100	DTR (high-confidence)	0	1.1		1	33.33	266	59.85
YJd1-k141_331609	Unclassified Virus	1833	3.26316	32.8	100	50.74	1	1	0	Complete	100	DTR (high-confidence)	0	1.1		1	100	255	83.64
YJd1-k141_329657	Unclassified Virus	1756	3.24452	0	0	45.79	3	3	0	Complete	100	DTR (medium-confidence)	0	1.1
YJd1-k141_329443	Circoviridae	2219	3.34616	22.9	62.92	43.35	2	2	0	Complete	100	DTR (high-confidence)	0	1.1		1	50	341	78.09
YJd1-k141_329291	Unclassified Virus	1831	3.26269	48.1	48.87	53.63	2	1	0	Complete	100	DTR (high-confidence)	0	1.1		1	50	194	93.31
YJd1-k141_328868	Unknown	2262	3.35449	48.1	13.44	46.99	3	3	0	Complete	100	DTR (medium-confidence)	0	1.1		1	33.33	91	43.77
YJd1-k141_328691	Circoviridae	2251	3.35238	37.3	11.26	47.36	4	3	0	Complete	100	DTR (high-confidence)	0	1.1		1	25	77	28.72
YJd1-k141_328622	Unclassified Virus	1864	3.27045	24.9	52.72	41.63	3	2	0	Complete	100	DTR (medium-confidence)	0	1.1		1	33.33	300	74.7
YJd1-k141_328489	Unclassified Virus	2075	3.31702	32	19.33	34.8	3	3	0	Complete	100	DTR (medium-confidence)	0	1.1		1	33.33	115	36.8
YJd1-k141_328448	Unclassified Virus	2262	3.35449	25.5	48.41	40.8	3	3	0	Complete	100	DTR (high-confidence)	0	1.1		1	33.33	320	81.6
YJd1-k141_328140	Unclassified Virus	2255	3.35315	27.6	49.39	48.69	3	1	0	High-quality	95.31	AAI-based (high-confidence)	0	1		1	33.33	163	44.99
YJd1-k141_326680	Circoviridae	2127	3.32777	67.7	100	43.44	2	0	0	High-quality	100	AAI-based (high-confidence)	0	1	no viral genes detected	2	100	72	48.74
YJd1-k141_325741	Unclassified Virus	1859	3.26928	39.7	14.05	41.26	4	0	0	High-quality	95.89	AAI-based (medium-confidence)	0	1	no viral genes detected	1	25	78	30.97
YJd1-k141_324000	Unclassified Virus	2358	3.37254	23.7	51.49	51.02	5	2	0	High-quality	100	AAI-based (medium-confidence)	0	1		1	20	312	73.94
YJd1-k141_319282	Unclassified Virus	3772	3.57657	25.9	39.37	48.38	5	1	0	High-quality	90.64	HMM-based (lower-bound)	0	1		1	20	385	99.72
YJd1-k141_305519	Unclassified Virus	2393	3.37894	26.4	24.47	50.81	4	1	0	High-quality	100	AAI-based (medium-confidence)	0	1		1	25	138	36.43
YJd1-k141_300671	Unclassified Virus	1908	3.28058	59	44.85	45.6	2	0	0	High-quality	100	AAI-based (medium-confidence)	0	1	no viral genes detected	1	50	61	35.99
YJd1-k141_30013	Genomoviridae	2804	3.44778	35.9	10.97	50.78	7	2	0	High-quality	99.74	HMM-based (lower-bound)	0	1		1	14.29	80	28.72
YJd1-k141_298693	Unclassified Virus	2151	3.33264	28	74.04	41.38	2	1	0	High-quality	100	HMM-based (lower-bound)	0	1		1	50	288	80.64
YJd1-k141_298692	Riboviria	3685	3.56644	29	45.2	36.99	3	1	0	High-quality	97.96	AAI-based (medium-confidence)	0	1		1	33.33	508	147.32
YJd1-k141_295763	Circoviridae	2167	3.33586	29.2	37.17	48.27	3	2	0	High-quality	100	AAI-based (medium-confidence)	0	1		1	33.33	142	41.46
YJd1-k141_294392	Unclassified Virus	2007	3.30255	36.7	23.86	36.97	3	3	0	High-quality	94.07	HMM-based (lower-bound)	0	1		1	33.33	126	46.24
YJd1-k141_2918	Unclassified Virus	2163	3.33506	52.5	20.07	48.77	3	0	0	Complete	100	DTR (high-confidence)	0	1.1	no viral genes detected	1	33.33	116	60.9
YJd1-k141_288045	Unclassified Virus	2353	3.37162	0	0	47.43	3	1	0	High-quality	91.21	HMM-based (lower-bound)	0	1
YJd1-k141_284524	Unclassified Virus	1734	3.23905	38.6	45.41	41.18	2	0	0	High-quality	92.74	AAI-based (medium-confidence)	0	1	no viral genes detected	1	50	99	38.21
YJd1-k141_279846	Unclassified Virus	2109	3.32408	26.7	37.27	35.99	3	2	0	High-quality	93.94	AAI-based (medium-confidence)	0	1		1	33.33	205	54.73
YJd1-k141_276362	Unclassified Virus	2188	3.34005	28.5	46.75	34.92	3	2	0	High-quality	90.13	HMM-based (lower-bound)	0	1		1	33.33	151	43.03
YJd1-k141_273424	Unclassified Virus	2425	3.38471	26	37.4	39.92	4	3	0	High-quality	100	AAI-based (medium-confidence)	0	1		1	25	273	70.98
YJd1-k141_272073	Circoviridae	2371	3.37493	31.8	24.93	47.41	3	2	0	Complete	100	DTR (high-confidence)	0	1.1		1	33.33	172	54.7
YJd1-k141_269828	Circoviridae	1848	3.2667	41.9	25.96	30.95	4	1	0	High-quality	100	AAI-based (high-confidence)	0	1.1		1	25	122	51.12
YJd1-k141_269551	Unclassified Virus	2264	3.35488	27.4	48.48	44.3	3	0	0	Complete	100	DTR (high-confidence)	0	1.1	no viral genes detected	1	33.33	287	78.64
YJd1-k141_269167	Unclassified Virus	2309	3.36342	42.8	22.06	46.08	5	0	0	Complete	100	DTR (high-confidence)	0	1.1	no viral genes detected	1	20	152	65.06
YJd1-k141_264920	Unclassified Virus	3637	3.56074	28.1	30.56	47.24	4	1	0	High-quality	100	AAI-based (medium-confidence)	0	1		1	25	301	84.58
YJd1-k141_261225	Unclassified Virus	1858	3.26905	25.3	38.76	32.67	4	1	0	Complete	100	DTR (high-confidence)	0	1.1		1	25	231	58.44
YJd1-k141_255452	Unclassified Virus	2207	3.3438	23.1	61.44	45.4	3	1	0	High-quality	100	AAI-based (medium-confidence)	0	1		1	33.33	282	65.14
YJd1-k141_25368	Unclassified Virus	2127	3.32777	24.9	45.97	34.79	2	1	0	High-quality	93.67	AAI-based (medium-confidence)	0	1		1	50	245	61.01
YJd1-k141_252923	Unclassified Virus	2205	3.34341	26	59.79	53.38	2	2	0	High-quality	100	AAI-based (high-confidence)	0	1		1	50	342	88.92
YJd1-k141_252858	Unclassified Virus	2358	3.37254	32.6	15.76	40.33	3	3	0	Complete	100	DTR (high-confidence)	0	1.1		1	33.33	116	37.82
YJd1-k141_25107	Unclassified Virus	2033	3.30814	23.6	56.96	42.99	2	2	0	High-quality	100	AAI-based (high-confidence)	0	1		1	50	311	73.4
YJd1-k141_248566	Genomoviridae	2478	3.3941	40	18.7	51.33	3	2	0	High-quality	100	AAI-based (high-confidence)	0	1		1	33.33	95	38
YJd1-k141_248214	Unclassified Virus	4000	3.60206	41.5	7.1	46.4	4	2	0	High-quality	99.83	HMM-based (lower-bound)	0	1		1	25	80	33.2
YJd1-k141_247829	Unclassified Virus	2064	3.31471	23.3	47.4	52.08	3	1	0	Complete	100	DTR (high-confidence)	0	1.1		1	33.33	283	65.94
YJd1-k141_247424	Unclassified Virus	1832	3.26293	41.3	48.62	46.4	3	2	0	High-quality	100	AAI-based (high-confidence)	0	1		1	33.33	212	87.56
YJd1-k141_247402	Unclassified Virus	2251	3.35238	28.7	51.14	31.76	3	0	0	High-quality	100	AAI-based (medium-confidence)	0	1	no viral genes detected	1	33.33	291	83.52
YJd1-k141_246757	Microviridae	4527	3.65581	39.7	10.36	33.24	8	3	0	Complete	100	DTR (medium-confidence)	0	1		1	12.5	144	57.17
YJd1-k141_246068	Unclassified Virus	2519	3.40123	36.6	17.99	47.04	5	0	0	High-quality	100	AAI-based (medium-confidence)	0	1	no viral genes detected	1	20	109	39.89
YJd1-k141_241175	Unclassified Virus	2787	3.44514	24.7	33.92	39.11	4	3	0	High-quality	100	AAI-based (medium-confidence)	0	1		1	25	268	66.2
YJd1-k141_234989	Unclassified Virus	1853	3.26788	24.7	49.57	51.81	2	1	0	Complete	100	DTR (high-confidence)	0	1.1		1	50	232	57.3
YJd1-k141_233790	Unclassified Virus	2351	3.37125	38.1	19.7	30.37	5	2	0	High-quality	100	HMM-based (lower-bound)	0	1		1	20	106	40.39
YJd1-k141_230144	Circoviridae	2723	3.43505	77.8	11.86	47.26	4	0	0	High-quality	100	AAI-based (medium-confidence)	0	1	no viral genes detected; contig >1.5x longer than expected genome length	1	25	37	28.79
YJd1-k141_227466	Unclassified Virus	2569	3.40976	27.2	40.39	44.73	3	2	0	High-quality	100	AAI-based (medium-confidence)	0	1		1	33.33	229	62.29
YJd1-k141_225551	Unclassified Virus	1791	3.2531	38.3	41.16	51.14	4	1	0	Complete	100	DTR (high-confidence)	0	1.1		1	25	242	92.69
YJd1-k141_221093	Unclassified Virus	1949	3.28981	36.8	24.32	35.86	3	2	0	High-quality	91.35	HMM-based (lower-bound)	0	1.05		1	33.33	126	46.37
YJd1-k141_218708	Circoviridae	1948	3.28959	29	52.51	36.91	2	1	0	High-quality	100	AAI-based (high-confidence)	0	1		1	50	230	66.7
YJd1-k141_217641	Circoviridae	2431	3.38578	23.1	51.39	39.12	3	2	0	High-quality	92.07	HMM-based (lower-bound)	0	1		1	33.33	369	85.24
YJd1-k141_217580	Unclassified Virus	1898	3.2783	29.2	62.41	52.58	2	0	0	Complete	100	DTR (high-confidence)	0	1.1	no viral genes detected	1	50	171	49.93
YJd1-k141_212513	Unclassified Virus	2608	3.41631	40.8	24.42	38.73	5	0	0	High-quality	100	AAI-based (high-confidence)	0	1	no viral genes detected	1	20	168	68.54
YJd1-k141_209202	Circoviridae	2101	3.32243	25.5	52.42	47.45	2	1	0	Complete	100	DTR (medium-confidence)	0	1.1		1	50	293	74.72
YJd1-k141_205305	Unclassified Virus	4469	3.65021	20.7	42.99	55.14	4	2	0	High-quality	100	AAI-based (high-confidence)	0	1		1	25	497	102.88
YJd1-k141_204233	Circoviridae	2396	3.37949	28.21	79.22	44.12	3	0	0	High-quality	100	AAI-based (medium-confidence)	0	1	no viral genes detected	2	66.67	488	137.66
YJd1-k141_196960	Unclassified Virus	1827	3.26174	27.3	37.36	45.7	3	2	0	High-quality	93.12	AAI-based (medium-confidence)	0	1		1	33.33	170	46.41
YJd1-k141_194917	Unclassified Virus	2100	3.32222	25.2	50.17	36.95	4	2	0	High-quality	96.93	HMM-based (lower-bound)	0	1		1	25	304	76.61
YJd1-k141_19340	Circoviridae	2429	3.38543	23.9	51.12	46.03	4	1	0	High-quality	100	AAI-based (medium-confidence)	0	1		1	25	296	70.74
YJd1-k141_191657	Unclassified Virus	2005	3.30211	24.9	41.86	39.2	4	1	0	High-quality	90.4	AAI-based (medium-confidence)	0	1		1	25	270	67.23
YJd1-k141_184825	Microviridae	4444	3.64777	25	21.46	58.98	5	2	0	Complete	100	DTR (high-confidence)	0	1		1	20	256	64
YJd1-k141_183304	Unclassified Virus	1786	3.25188	33.6	48.51	51.46	3	1	0	Complete	100	DTR (high-confidence)	0	1.1		1	33.33	260	87.36
YJd1-k141_178906	Unknown	2948	3.46953	26.5	37.28	45.73	2	1	0	High-quality	100	AAI-based (medium-confidence)	0	1		1	50	277	73.41
YJd1-k141_177301	Unclassified Virus	2499	3.39777	23.4	35.8	51.42	3	3	0	Complete	100	DTR (high-confidence)	0	1.05		1	33.33	271	63.41
YJd1-k141_174763	Unclassified Virus	3910	3.59218	25.3	18.46	39.74	4	2	0	High-quality	93.96	HMM-based (lower-bound)	0	1		1	25	182	46.05
YJd1-k141_173943	Unclassified Virus	2051	3.31197	48.5	46.36	41.44	3	1	0	High-quality	100	AAI-based (medium-confidence)	0	1		1	33.33	229	111.06
YJd1-k141_172617	Unclassified Virus	2658	3.42455	70.6	15.58	46.73	6	0	0	High-quality	100	AAI-based (medium-confidence)	0	1	no viral genes detected	1	16.67	120	84.72
YJd1-k141_172006	Unclassified Virus	2402	3.38057	27.8	44.26	44.21	3	2	0	High-quality	100	HMM-based (lower-bound)	0	1		1	33.33	235	65.33
YJd1-k141_169407	Unclassified Virus	2907	3.46345	24.1	27.09	40.9	3	2	0	High-quality	100	AAI-based (medium-confidence)	0	1		1	33.33	198	47.72
YJd1-k141_168876	Unclassified Virus	2962	3.47159	31.3	21.86	50.98	3	2	0	High-quality	100	AAI-based (medium-confidence)	0	1		1	33.33	167	52.27
YJd1-k141_163012	Unclassified Virus	2584	3.41229	58.1	9.5	56.08	8	0	0	High-quality	100	AAI-based (medium-confidence)	0	1	no viral genes detected	1	12.5	64	37.18
YJd1-k141_162373	Unclassified Virus	2093	3.32077	33.3	46.36	44.67	3	1	0	High-quality	100	HMM-based (lower-bound)	0	1		1	33.33	223	74.26
YJd1-k141_160499	Unclassified Virus	1901	3.27898	26.8	59.92	41.71	2	1	0	Complete	100	DTR (medium-confidence)	0	1.1		1	50	299	80.13
YJd1-k141_159191	Unclassified Virus	1844	3.26576	28.9	42.71	49.51	3	1	0	High-quality	91.27	AAI-based (medium-confidence)	0	1		1	33.33	246	71.09
YJd1-k141_158803	Unclassified Virus	1987	3.2982	35.5	100	42.33	1	0	0	Complete	100	DTR (high-confidence)	0	1.1	no viral genes detected	1	100	296	105.08
YJd1-k141_155564	Unclassified Virus	2397	3.37967	22.4	100	39.26	1	1	0	High-quality	100	AAI-based (high-confidence)	0	1		1	100	306	68.54
YJd1-k141_151846	Unclassified Virus	2078	3.31765	33.7	26.73	35.66	3	2	0	High-quality	96.9	HMM-based (lower-bound)	0	1		1	33.33	120	40.44
YJd1-k141_149134	Unclassified Virus	2181	3.33866	37.6	26.43	48.46	4	0	0	High-quality	98.22	AAI-based (medium-confidence)	0	1	no viral genes detected	1	25	166	62.42
YJd1-k141_147851	Unclassified Virus	2499	3.39777	42.2	12.48	46.54	6	0	0	Complete	100	DTR (high-confidence)	0	1.05	no viral genes detected	1	16.67	79	33.34
YJd1-k141_146555	Circoviridae	2619	3.41814	31.6	14.3	51.32	5	3	0	High-quality	100	AAI-based (medium-confidence)	0	1		1	20	111	35.08
YJd1-k141_141357	Circoviridae	1895	3.27761	61.5	100	44.59	1	0	0	High-quality	100	AAI-based (high-confidence)	0	1	no viral genes detected	1	100	60	36.9
YJd1-k141_13855	Microviridae	3957	3.59737	24.1	25.54	50.09	5	3	0	High-quality	90.09	AAI-based (medium-confidence)	0	1		1	20	296	71.34
YJd1-k141_132697	Microviridae	4037	3.60606	40.4	6.73	43.57	7	6	0	High-quality	90.91	AAI-based (high-confidence)	0	1		1	14.29	82	33.13
YJd1-k141_131900	Unclassified Virus	2692	3.43008	57.9	6.33	51	5	0	0	High-quality	100	AAI-based (high-confidence)	0	1	no viral genes detected	1	20	39	22.58
YJd1-k141_12963	Unclassified Virus	2571	3.4101	24.7	35.51	53.68	4	3	0	High-quality	99.69	HMM-based (lower-bound)	0	1		1	25	267	65.95
YJd1-k141_126163	Circoviridae	2136	3.3296	27.5	36.24	42.84	3	2	0	High-quality	91.7	AAI-based (medium-confidence)	0	1.05		1	33.33	237	65.17
YJd1-k141_124900	Unclassified Virus	2006	3.30233	21.2	49.82	34.05	3	2	0	Complete	100	DTR (high-confidence)	0	1.1		1	33.33	282	59.78
YJd1-k141_124814	Circoviridae	3784	3.57795	28.3	13.76	49.89	6	3	0	High-quality	90.93	HMM-based (lower-bound)	0	1		1	16.67	109	30.85
YJd1-k141_119859	Unclassified Virus	2483	3.39498	66.7	9.78	42.45	5	0	0	High-quality	90.22	AAI-based (medium-confidence)	0	1	no viral genes detected	1	20	45	30.02
YJd1-k141_119502	Unclassified Virus	1977	3.29601	69.8	7.69	49.37	6	0	0	Complete	100	DTR (high-confidence)	0	1	no viral genes detected	1	16.67	44	30.71
YJd1-k141_112797	Genomoviridae	2118	3.32593	36.8	18.74	48.06	4	3	0	High-quality	96.56	AAI-based (medium-confidence)	0	1		1	25	113	41.58
YJd1-k141_108862	Unclassified Virus	4101	3.61289	33	27.52	45.72	5	1	0	Complete	100	DTR (high-confidence)	0	1		1	20	289	95.37
YJd1-k141_107276	Microviridae	4355	3.63899	61.1	2.97	42.37	9	7	0	High-quality	96.61	AAI-based (high-confidence)	0	1		1	11.11	39	23.83
YJd1-k141_106941	Unclassified Virus	2102	3.32263	29.5	27.57	47.72	4	2	0	Complete	100	DTR (high-confidence)	0	1.1		1	25	169	49.85
YJd1-k141_105114	Unclassified Virus	2580	3.41162	23.7	37.48	42.79	7	1	0	High-quality	94.55	AAI-based (medium-confidence)	0	1		1	14.29	271	64.23
YJd1-k141_101830	Unclassified Virus	2066	3.31513	21.3	48.08	47.58	3	1	0	Complete	100	DTR (high-confidence)	0	1.1		1	33.33	313	66.67
TWr1-k141_8545	Unclassified Virus	2216	3.34557	27.5	47.83	46.75	4	1	0	High-quality	100	AAI-based (high-confidence)	0	1		1	25	286	78.65
TWr1-k141_8334	Unclassified Virus	1898	3.2783	29.7	44.33	45.73	3	1	0	High-quality	97.45	AAI-based (medium-confidence)	0	1		1	33.33	215	63.85
TWr1-k141_5758	Unclassified Virus	1956	3.29137	27.7	52.89	48.77	3	1	0	Complete	100	DTR (high-confidence)	0	1		1	33.33	265	73.41
TWr1-k141_37267	Unclassified Virus	2155	3.33345	22.5	43.49	48.26	4	1	0	Complete	100	DTR (high-confidence)	0	1.1		1	25	284	63.9
TWr1-k141_3706	Unclassified Virus	2397	3.37967	30.8	84.95	44.56	2	1	0	High-quality	100	HMM-based (lower-bound)	0	1		1	50	237	73
TWr1-k141_36969	Unclassified Virus	1779	3.25018	25.6	44.83	49.3	3	2	0	Complete	100	DTR (medium-confidence)	0	1.1		1	33.33	230	58.88
TWr1-k141_36837	Unclassified Virus	1900	3.27875	25	26.06	43.11	3	3	0	Complete	100	DTR (medium-confidence)	0	1.1		1	33.33	147	36.75
TWr1-k141_36777	Unclassified Virus	1784	3.25139	37.1	18.87	51.01	3	2	0	Complete	100	DTR (high-confidence)	0	1.1		1	33.33	87	32.28
TWr1-k141_36612	Unclassified Virus	1770	3.24797	27.2	48.68	46.78	3	1	0	Complete	100	DTR (high-confidence)	0	1.1		1	33.33	240	65.28
TWr1-k141_36581	Unclassified Virus	1719	3.23528	39.7	55.37	46.42	3	2	0	Complete	100	DTR (high-confidence)	0	1.1		1	33.33	263	104.41
TWr1-k141_36554	Unclassified Virus	1867	3.27114	43.8	35.65	39.8	3	1	0	Complete	100	DTR (high-confidence)	0	1.1		1	33.33	185	81.03
TWr1-k141_36502	Unclassified Virus	1835	3.26364	37.2	49.72	50.52	3	2	0	Complete	100	DTR (medium-confidence)	0	1.1		1	33.33	263	97.84
TWr1-k141_36420	Unclassified Virus	1667	3.22194	45.1	29.37	40.01	3	2	0	Complete	100	DTR (high-confidence)	0	1.1		1	33.33	136	61.34
TWr1-k141_36361	Unclassified Virus	2028	3.30707	26.4	49.74	47.04	3	1	0	Complete	100	DTR (high-confidence)	0	1.1		1	33.33	290	76.56
TWr1-k141_36348	Unclassified Virus	1771	3.24822	24.7	48.57	45.23	2	2	0	Complete	100	DTR (high-confidence)	0	1.1		1	50	238	58.79
TWr1-k141_36325	Unclassified Virus	2157	3.33385	34.1	50.78	47.33	3	0	0	Complete	100	DTR (high-confidence)	0	1.1	no viral genes detected	1	33.33	294	100.25
TWr1-k141_36309	Unclassified Virus	1788	3.25237	24.2	44.01	44.74	3	2	0	Complete	100	DTR (medium-confidence)	0	1.1		1	33.33	239	57.84
TWr1-k141_36304	Circoviridae	1958	3.29181	25.1	54.83	48.21	3	3	0	Complete	100	DTR (high-confidence)	0	1.1		1	33.33	335	84.08
TWr1-k141_36297	Unclassified Virus	2030	3.3075	34.1	19.58	46.06	3	2	0	Complete	100	DTR (high-confidence)	0	1.1		1	33.33	111	37.85
TWr1-k141_36224	Unclassified Virus	1870	3.27184	29.7	39.23	43.32	3	1	0	Complete	100	DTR (medium-confidence)	0	1.1		1	33.33	213	63.26
TWr1-k141_36207	Unknown	2291	3.36003	27.8	45.61	49.06	2	2	0	Complete	100	DTR (high-confidence)	0	1.1		1	50	291	80.9
TWr1-k141_36198	Unclassified Virus	1788	3.25237	33.9	43.07	44.07	3	2	0	Complete	100	DTR (high-confidence)	0	1.1		1	33.33	205	69.5
TWr1-k141_36196	Unclassified Virus	2190	3.34044	22.6	56.25	43.93	2	2	0	Complete	100	DTR (high-confidence)	0	1.1		1	50	306	69.16
TWr1-k141_36183	Unclassified Virus	1985	3.29776	26.4	48.33	40.65	3	1	0	Complete	100	DTR (high-confidence)	0	1.1		1	33.33	246	64.94
TWr1-k141_36170	Unclassified Virus	2322	3.36586	30.4	19.48	48.75	3	3	0	Complete	100	DTR (high-confidence)	0	1.1		1	33.33	112	34.05
TWr1-k141_36140	Unclassified Virus	1741	3.2408	39.7	33.33	46.35	3	2	0	Complete	100	DTR (high-confidence)	0	1.1		1	33.33	156	61.93
TWr1-k141_36104	Unclassified Virus	2094	3.32098	47.2	49.14	41.07	3	1	0	Complete	100	DTR (high-confidence)	0	1.1		1	33.33	287	135.46
TWr1-k141_36091	Unclassified Virus	1767	3.24724	48	53.98	52.18	2	1	0	Complete	100	DTR (high-confidence)	0	1.1		1	50	244	117.12
TWr1-k141_36086	Unclassified Virus	1725	3.23679	27.6	43.69	45.45	3	2	0	Complete	100	DTR (high-confidence)	0	1.1		1	33.33	225	62.1
TWr1-k141_36074	Unclassified Virus	1756	3.24452	26.9	42.07	48.97	3	2	0	Complete	100	DTR (high-confidence)	0	1.1		1	33.33	199	53.53
TWr1-k141_36041	Circoviridae	2005	3.30211	24.1	55.59	55.86	2	2	0	Complete	100	DTR (high-confidence)	0	1.1		1	50	318	76.64
TWr1-k141_35990	Unclassified Virus	1853	3.26788	28.4	50.41	46.03	2	1	0	Complete	100	DTR (medium-confidence)	0	1.1		1	50	243	69.01
TWr1-k141_35969	Unclassified Virus	2477	3.39393	46	12.61	46.35	3	2	0	Complete	100	DTR (high-confidence)	0	1.1		1	33.33	89	40.94
TWr1-k141_35942	Unclassified Virus	1816	3.25912	49.1	42.31	54.02	2	1	0	Complete	100	DTR (high-confidence)	0	1.1		1	50	165	81.02
TWr1-k141_35905	Unclassified Virus	1640	3.21484	27.6	42.11	43.17	3	2	0	Complete	100	DTR (high-confidence)	0	1.1		1	33.33	192	52.99
TWr1-k141_35896	Unclassified Virus	2995	3.4764	50	7.69	40.93	7	0	0	Complete	100	DTR (high-confidence)	0	1	no viral genes detected	1	14.29	65	32.5
TWr1-k141_35838	Unclassified Virus	1642	3.21537	46.9	41.13	50.12	2	1	0	Complete	100	DTR (high-confidence)	0	1.1		1	50	160	75.04
TWr1-k141_35815	Unclassified Virus	2330	3.36736	29.1	19.13	47.85	4	2	0	Complete	100	DTR (high-confidence)	0	1.1		1	25	127	36.96
TWr1-k141_35806	Unclassified Virus	1898	3.2783	28.1	48.45	42.94	3	1	0	Complete	100	DTR (medium-confidence)	0	1.1		1	33.33	265	74.47
TWr1-k141_35801	Unclassified Virus	2116	3.32552	26.7	56.73	47.73	2	1	0	Complete	100	DTR (high-confidence)	0	1.1		1	50	295	78.77
TWr1-k141_35789	Unclassified Virus	1954	3.29092	29.4	54.17	45.75	3	1	0	Complete	100	DTR (high-confidence)	0	1.1		1	33.33	286	84.08
TWr1-k141_35783	Unclassified Virus	1865	3.27068	0	0	40.54	3	2	0	Complete	100	DTR (medium-confidence)	0	1.1
TWr1-k141_35781	Unknown	1852	3.26764	0	0	44.11	2	1	0	Complete	100	DTR (medium-confidence)	0	1.1
TWr1-k141_35763	Genomoviridae	2305	3.36267	25.9	42.86	51.02	3	2	0	Complete	100	DTR (high-confidence)	0	1.1		1	33.33	237	61.38
TWr1-k141_35758	Unclassified Virus	1762	3.24601	23.2	46.77	41.26	3	1	0	Complete	100	DTR (high-confidence)	0	1.1		1	33.33	246	57.07
TWr1-k141_35716	Unclassified Virus	1803	3.256	24.5	45.74	46.26	3	2	0	Complete	100	DTR (high-confidence)	0	1.1		1	33.33	247	60.52
TWr1-k141_35713	Unclassified Virus	2016	3.30449	28.9	50.53	41.62	3	1	0	Complete	100	DTR (high-confidence)	0	1.1		1	33.33	287	82.94
TWr1-k141_35709	Genomoviridae	2254	3.35295	34.7	16.02	47.91	4	3	0	Complete	100	DTR (high-confidence)	0	1.1		1	25	99	34.35
TWr1-k141_34973	Unclassified Virus	2415	3.38292	22.8	32.89	46.54	5	2	0	High-quality	100	AAI-based (medium-confidence)	0	1		1	20	246	56.09
TWr1-k141_34910	Unclassified Virus	1926	3.28466	33.7	38.92	49.69	2	1	0	Complete	100	DTR (high-confidence)	0	1.1		1	50	181	61
TWr1-k141_34451	Unclassified Virus	2257	3.35353	27.6	51	47.41	3	1	0	High-quality	100	AAI-based (medium-confidence)	0	1		1	33.33	280	77.28
TWr1-k141_33874	Riboviria	4877	3.68815	43.5	27.74	52.25	3	2	0	High-quality	100	AAI-based (medium-confidence)	0	1		1	33.33	412	179.22
TWr1-k141_32766	Unclassified Virus	7533	3.87697	19.6	38.59	39.52	2	2	0	High-quality	91.69	AAI-based (medium-confidence)	0	1		1	50	896	175.62
TWr1-k141_30752	Circoviridae	2986	3.47509	34.1	28.9	51.57	6	1	0	High-quality	100	HMM-based (lower-bound)	0	1		1	16.67	241	82.18
TWr1-k141_28574	Circoviridae	2413	3.38256	81.3	11.6	48.57	4	1	0	High-quality	100	AAI-based (medium-confidence)	0	1		1	25	58	47.15
TWr1-k141_2798	Unclassified Virus	3319	3.52101	32.5	33.57	40.83	6	3	0	High-quality	100	AAI-based (medium-confidence)	0	1	contig >1.5x longer than expected genome length	1	16.67	282	91.65
TWr1-k141_27053	Unclassified Virus	2332	3.36773	52.5	36.65	50.43	3	1	0	High-quality	100	AAI-based (medium-confidence)	0	1		1	33.33	199	104.47
TWr1-k141_25974	Unclassified Virus	2324	3.36624	0	0	43.33	3	1	0	High-quality	90.09	HMM-based (lower-bound)	0	1
TWr1-k141_25308	Unclassified Virus	3071	3.48728	24.5	25.38	38.46	4	4	0	High-quality	98.41	HMM-based (lower-bound)	0	1		1	25	203	49.73
TWr1-k141_23407	Circoviridae	1838	3.26435	45.3	35.71	42.11	4	0	0	Complete	100	DTR (high-confidence)	0	1.1	no viral genes detected	1	25	90	40.77
TWr1-k141_23132	Unclassified Virus	1807	3.25696	27.9	49.8	52.74	2	1	0	Complete	100	DTR (medium-confidence)	0	1		1	50	254	70.87
TWr1-k141_23017	Unclassified Virus	2092	3.32056	44	53.31	49.81	3	1	0	High-quality	100	AAI-based (medium-confidence)	0	1		1	33.33	306	134.64
TWr1-k141_22141	Riboviria	8350	3.92169	22.9	35.39	39.26	3	2	0	High-quality	92.22	AAI-based (high-confidence)	0	1		1	33.33	862	197.4
TWr1-k141_22117	Genomoviridae	2388	3.37803	33.3	12.76	48.74	5	2	0	High-quality	100	AAI-based (high-confidence)	0	1		1	20	97	32.3
TWr1-k141_21786	Genomoviridae	2303	3.36229	34.4	22.99	47.07	4	1	0	Complete	100	DTR (high-confidence)	0	1.1		1	25	137	47.13
TWr1-k141_19320	Circoviridae	1843	3.26553	37.9	73.89	45.31	2	0	0	High-quality	100	AAI-based (medium-confidence)	0	1.1	no viral genes detected	1	50	116	43.96
TWr1-k141_16142	Unclassified Virus	2151	3.33264	25.1	52.2	48.07	2	1	0	High-quality	97.48	AAI-based (high-confidence)	0	1		1	50	320	80.32
TWr1-k141_15768	Unclassified Virus	2666	3.42586	32.6	23.42	49.89	4	0	0	High-quality	100	AAI-based (medium-confidence)	0	1	no viral genes detected	1	25	181	59.01
TWr1-k141_15140	Unclassified Virus	1774	3.24895	27	69.89	27.62	3	2	0	High-quality	100	AAI-based (high-confidence)	0	1		1	33.33	260	70.2
TWr1-k141_1413	Unclassified Virus	2015	3.30428	24	54.95	49.38	2	2	0	Complete	100	DTR (high-confidence)	0	1.1		1	50	300	72
TWr1-k141_13722	Unclassified Virus	1801	3.25551	27.1	49.06	40.7	3	1	0	Complete	100	DTR (medium-confidence)	0	1.1		1	33.33	261	70.73
TWr1-k141_13470	Circoviridae	2559	3.40807	23.8	42.24	52.48	3	3	0	High-quality	96.92	HMM-based (lower-bound)	0	1		1	33.33	335	79.73
TWr1-k141_13037	Riboviria	3177	3.50202	22.9	46.97	35.76	2	1	0	High-quality	91.5	AAI-based (medium-confidence)	0	1		1	50	473	108.32
TWr1-k141_12160	Genomoviridae	2236	3.34947	34.8	25.46	50.45	3	3	0	High-quality	100	AAI-based (high-confidence)	0	1		1	33.33	166	57.77
TWr1-k141_11895	Unknown	2153	3.33304	28.8	26.72	40.64	3	3	0	Complete	100	DTR (high-confidence)	0	1.1		1	33.33	155	44.64
TWr1-k141_10088	Unclassified Virus	2680	3.42813	26.5	33.33	41.94	4	1	0	High-quality	100	HMM-based (lower-bound)	0	1		1	25	247	65.45
TWd3-k141_10518	Unclassified Virus	1943	3.28847	0	0	47.97	3	1	0	High-quality	91.23	HMM-based (lower-bound)	0	1
TWd2-k141_6988	Unclassified Virus	2872	3.45818	33.2	40.41	47.11	3	1	0	High-quality	100	HMM-based (lower-bound)	0	1		1	33.33	215	71.38
TWd2-k141_5676	Unclassified Virus	2523	3.40192	27.1	21.83	30.64	3	3	0	High-quality	100	AAI-based (medium-confidence)	0	1		1	33.33	141	38.21
TWd1-k141_9031	Unclassified Virus	3380	3.52892	39.2	8.13	50.71	7	0	0	High-quality	100	AAI-based (medium-confidence)	0	1	no viral genes detected	1	14.29	68	26.66
TWd1-k141_8646	Unknown	2309	3.36342	0	0	38.76	4	1	0	High-quality	100	HMM-based (lower-bound)	0	1
TWd1-k141_64310	Unclassified Virus	1903	3.27944	23.3	62.33	43.56	2	2	0	Complete	100	DTR (medium-confidence)	0	1.1		1	50	278	64.77
TWd1-k141_64175	Unclassified Virus	2300	3.36173	44.1	27.16	46.22	5	0	0	Complete	100	DTR (high-confidence)	0	1.1	no viral genes detected	1	20	179	78.94
TWd1-k141_63791	Unclassified Virus	2072	3.31639	0	0	31.42	3	1	0	Complete	100	DTR (high-confidence)	0	1.1
TWd1-k141_63731	Unclassified Virus	1774	3.24895	25.8	47.63	47.07	2	1	0	Complete	100	DTR (high-confidence)	0	1.1		1	50	201	51.86
TWd1-k141_63593	Circoviridae	2040	3.30963	24.9	34.95	43.04	4	1	0	Complete	100	DTR (medium-confidence)	0	1.1		1	25	216	53.78
TWd1-k141_63489	Unclassified Virus	1821	3.26031	0	0	40.42	3	2	0	Complete	100	DTR (medium-confidence)	0	1.1
TWd1-k141_63388	Unknown	1856	3.26858	0	0	38.69	3	1	0	Complete	100	DTR (medium-confidence)	0	1.1
TWd1-k141_63316	Unclassified Virus	2032	3.30792	35.9	18.42	48.72	3	1	0	Complete	100	DTR (high-confidence)	0	1.1		1	33.33	93	33.39
TWd1-k141_63267	Unclassified Virus	1932	3.28601	24.8	51.63	39.54	3	3	0	Complete	100	DTR (medium-confidence)	0	1.1		1	33.33	285	70.68
TWd1-k141_63190	Unknown	1989	3.29863	0	0	38.26	2	1	0	Complete	100	DTR (high-confidence)	0	1.1
TWd1-k141_63140	Unclassified Virus	1680	3.22531	37.8	23.12	28.39	3	0	0	Complete	100	DTR (high-confidence)	0	1.1	no viral genes detected	1	33.33	123	46.49
TWd1-k141_63042	Unclassified Virus	1992	3.29929	28	42.02	43.52	2	0	0	Complete	100	DTR (high-confidence)	0	1.1	no viral genes detected	1	50	208	58.24
TWd1-k141_63012	Unclassified Virus	1963	3.29292	28.9	42.27	35.35	3	1	0	Complete	100	DTR (high-confidence)	0	1.1		1	33.33	238	68.78
TWd1-k141_62764	Unclassified Virus	2015	3.30428	23.4	49.91	30.07	3	2	0	Complete	100	DTR (medium-confidence)	0	1.1		1	33.33	284	66.46
TWd1-k141_62731	Unclassified Virus	1787	3.25212	32.3	75.88	45.78	3	0	0	Complete	100	DTR (high-confidence)	0	1.1	no viral genes detected	1	33.33	343	110.79
TWd1-k141_62640	Unclassified Virus	2079	3.31785	22.7	50.6	44.68	2	1	0	Complete	100	DTR (high-confidence)	0	1.1		1	50	252	57.2
TWd1-k141_62634	Unclassified Virus	2346	3.37033	41.8	25.43	44.54	5	0	0	Complete	100	DTR (high-confidence)	0	1.1	no viral genes detected	1	20	178	74.4
TWd1-k141_62544	Unclassified Virus	1810	3.25768	29.2	42.28	42.43	3	2	0	Complete	100	DTR (high-confidence)	0	1.1		1	33.33	219	63.95
TWd1-k141_62475	Unclassified Virus	2317	3.36493	36.6	32.95	33.97	3	0	0	Complete	100	DTR (high-confidence)	0	1.1	no viral genes detected	1	33.33	198	72.47
TWd1-k141_62414	Unclassified Virus	2303	3.36229	41.1	18.36	43.94	3	3	0	Complete	100	DTR (high-confidence)	0	1.1		1	33.33	130	53.43
TWd1-k141_62390	Unclassified Virus	1772	3.24846	30.8	31.79	35.55	3	2	0	Complete	100	DTR (medium-confidence)	0	1.1		1	33.33	158	48.66
TWd1-k141_62383	Unclassified Virus	2258	3.35372	29.1	44.2	44.64	3	0	0	Complete	100	DTR (high-confidence)	0	1.1	no viral genes detected	1	33.33	259	75.37
TWd1-k141_62370	Microviridae	3675	3.56526	27.2	19.72	43.89	4	2	0	Complete	100	DTR (medium-confidence)	0	1		1	25	211	57.39
TWd1-k141_62362	Circoviridae	2253	3.35276	23.6	47.58	46.96	2	1	0	Complete	100	DTR (high-confidence)	0	1.1		1	50	275	64.9
TWd1-k141_62286	Unclassified Virus	1990	3.29885	36.4	45.42	43.32	3	1	0	Complete	100	DTR (high-confidence)	0	1.1		1	33.33	263	95.73
TWd1-k141_62173	Unclassified Virus	2320	3.36549	23.8	40.39	44.05	2	2	0	Complete	100	DTR (high-confidence)	0	1.1		1	50	248	59.02
TWd1-k141_62141	Unknown	1930	3.28556	0	0	37.82	3	1	0	Complete	100	DTR (high-confidence)	0	1.1
TWd1-k141_62064	Circoviridae	1679	3.22505	29.1	48.79	35.56	2	1	0	Complete	100	DTR (high-confidence)	0	1.1		1	50	181	52.67
TWd1-k141_62042	Unclassified Virus	2125	3.32736	24	42.96	37.18	3	2	0	Complete	100	DTR (medium-confidence)	0	1.1		1	33.33	238	57.12
TWd1-k141_62039	Unclassified Virus	2489	3.39602	30	39.24	34.99	3	2	0	Complete	100	DTR (high-confidence)	0	1.1		1	33.33	268	80.4
TWd1-k141_62024	Unclassified Virus	2348	3.3707	31.2	40.72	46.29	3	1	0	Complete	100	DTR (high-confidence)	0	1.1		1	33.33	248	77.38
TWd1-k141_61992	Unclassified Virus	4753	3.67697	38.2	6.08	44.18	12	0	0	Complete	100	DTR (high-confidence)	0	1	no viral genes detected	1	8.33	84	32.09
TWd1-k141_61957	Unclassified Virus	2425	3.38471	23	38.88	47.18	4	2	0	Complete	100	DTR (high-confidence)	0	1.1		1	25	250	57.5
TWd1-k141_61950	Microviridae	4440	3.64738	24.2	18.42	54.3	6	2	0	Complete	100	DTR (high-confidence)	0	1		1	16.67	251	60.74
TWd1-k141_61948	Circoviridae	2808	3.4484	24.4	34.12	36.89	4	1	0	Complete	100	DTR (high-confidence)	0	1.05		1	25	290	70.76
TWd1-k141_61938	Unclassified Virus	2680	3.42813	24.9	49.61	41.6	3	2	0	Complete	100	DTR (high-confidence)	0	1.1		1	33.33	318	79.18
TWd1-k141_61932	Unclassified Virus	1900	3.27875	28.9	31.21	48.53	3	2	0	Complete	100	DTR (medium-confidence)	0	1.1		1	33.33	142	41.04
TWd1-k141_61909	Unclassified Virus	2125	3.32736	34.3	35.39	44.75	3	0	0	Complete	100	DTR (high-confidence)	0	1.1	no viral genes detected	1	33.33	212	72.72
TWd1-k141_61863	Unclassified Virus	2472	3.39305	24.7	38.92	48.1	3	1	0	Complete	100	DTR (high-confidence)	0	1.1		1	33.33	295	72.86
TWd1-k141_59880	Unclassified Virus	2524	3.40209	28.7	30.85	35.86	4	0	0	High-quality	100	AAI-based (medium-confidence)	0	1	no viral genes detected	1	25	215	61.7
TWd1-k141_59247	Circoviridae	1784	3.25139	27.5	45.33	35.65	3	2	0	Complete	100	DTR (medium-confidence)	0	1.1		1	33.33	223	61.33
TWd1-k141_59186	Unclassified Virus	1971	3.29469	45.1	17.35	48.2	3	2	0	High-quality	97.57	AAI-based (medium-confidence)	0	1		1	33.33	97	43.75
TWd1-k141_58076	Unclassified Virus	2137	3.3298	22	59.79	35.1	2	2	0	Complete	100	DTR (medium-confidence)	0	1.1		1	50	345	75.9
TWd1-k141_57726	Unclassified Virus	2064	3.31471	24.6	54.49	42.97	2	2	0	Complete	100	DTR (medium-confidence)	0	1.1		1	50	279	68.63
TWd1-k141_57374	Unclassified Virus	2597	3.41447	25.6	25.06	38.35	4	2	0	High-quality	100	AAI-based (medium-confidence)	0	1		1	25	197	50.43
TWd1-k141_57178	Unclassified Virus	2465	3.39182	26	29.26	47.63	3	2	0	High-quality	100	AAI-based (high-confidence)	0	1		1	33.33	213	55.38
TWd1-k141_56701	Circoviridae	1974	3.29535	23.7	45.04	41.24	3	2	0	High-quality	100	AAI-based (high-confidence)	0	1		1	33.33	245	58.06
TWd1-k141_56310	Unclassified Virus	2013	3.30384	24.8	54.85	46.7	2	1	0	High-quality	94.52	HMM-based (lower-bound)	0	1		1	50	294	72.91
TWd1-k141_55167	Unclassified Virus	1939	3.28758	43.1	100	46.52	1	0	0	High-quality	100	AAI-based (medium-confidence)	0	1	no viral genes detected	1	100	65	28.02
TWd1-k141_53397	Unclassified Virus	3912	3.5924	26.9	25.82	39.29	7	1	0	High-quality	94.01	HMM-based (lower-bound)	0	1		1	14.29	291	78.28
TWd1-k141_53205	Unclassified Virus	2585	3.41246	50.4	21.22	50.91	4	0	0	High-quality	100	AAI-based (medium-confidence)	0	1	no viral genes detected	1	25	118	59.47
TWd1-k141_52681	Circoviridae	2514	3.40037	25	34.54	36.52	4	1	0	High-quality	100	AAI-based (medium-confidence)	0	1		1	25	238	59.5
TWd1-k141_51119	Circoviridae	2272	3.35641	37.9	44.28	45.69	3	1	0	High-quality	91.56	AAI-based (medium-confidence)	0	1		1	33.33	120	45.48
TWd1-k141_50886	Microviridae	4661	3.66848	23.6	14.07	43.66	8	5	0	High-quality	100	AAI-based (high-confidence)	0	1		1	12.5	201	47.44
TWd1-k141_49533	Circoviridae	3124	3.49471	27.1	63.08	48.66	2	1	0	High-quality	100	AAI-based (medium-confidence)	0	1		1	50	164	44.44
TWd1-k141_4900	Unclassified Virus	2358	3.37254	28.9	35.72	34.22	4	2	0	High-quality	97.32	HMM-based (lower-bound)	0	1		1	25	249	71.96
TWd1-k141_4822	Microviridae	4921	3.69205	34.8	11.32	59.26	7	6	0	High-quality	100	AAI-based (high-confidence)	0	1		1	14.29	160	55.68
TWd1-k141_48031	Microviridae	4311	3.63458	26.5	20.43	53.12	7	2	0	Complete	100	DTR (high-confidence)	0	1		1	14.29	283	75
TWd1-k141_47869	Unclassified Virus	4938	3.69355	22.5	32.28	43.36	4	1	0	Complete	100	DTR (high-confidence)	0	1		1	25	481	108.22
TWd1-k141_4783	Microviridae	4244	3.62778	24	20.16	32.49	7	4	0	Complete	100	ITR (high-confidence)	0	1		1	14.29	269	64.56
TWd1-k141_47371	Unclassified Virus	2090	3.32015	25.3	67.63	48.09	2	2	0	High-quality	92.7	AAI-based (high-confidence)	0	1		1	50	282	71.35
TWd1-k141_47087	Unclassified Virus	2292	3.36021	23.9	41.67	42.71	3	3	0	Complete	100	DTR (medium-confidence)	0	1.1		1	33.33	265	63.34
TWd1-k141_46412	Unclassified Virus	3038	3.48259	29.4	40.58	29.2	3	1	0	High-quality	100	HMM-based (lower-bound)	0	1		1	33.33	211	62.03
TWd1-k141_45772	Parvoviridae	5723	3.75762	25.3	39.49	34.93	5	2	0	High-quality	100	AAI-based (medium-confidence)	0	1		1	20	648	163.94
TWd1-k141_4524	Unclassified Virus	3432	3.53555	26.5	35.1	48.14	7	1	0	Complete	100	DTR (high-confidence)	0	1		1	14.29	385	102.03
TWd1-k141_44623	Unclassified Virus	2587	3.4128	28.7	32.07	40.97	3	1	0	High-quality	100	AAI-based (medium-confidence)	0	1		1	33.33	203	58.26
TWd1-k141_43813	Unclassified Virus	1944	3.2887	25.6	42.66	30.45	3	2	0	High-quality	100	AAI-based (medium-confidence)	0	1		1	33.33	221	56.58
TWd1-k141_42432	Unclassified Virus	1807	3.25696	25.7	53.76	48.2	3	1	0	High-quality	91.74	AAI-based (medium-confidence)	0	1.05		1	33.33	236	60.65
TWd1-k141_41787	Circoviridae	2331	3.36754	24	44.09	54.31	3	1	0	Complete	100	DTR (high-confidence)	0	1.1		1	33.33	302	72.48
TWd1-k141_41254	Microviridae	4459	3.64924	22	19.5	36.73	8	5	0	High-quality	99.73	AAI-based (medium-confidence)	0	1		1	12.5	279	61.38
TWd1-k141_40712	Microviridae	4731	3.67495	24.4	21.16	44.54	7	5	0	High-quality	100	AAI-based (high-confidence)	0	1		1	14.29	298	72.71
TWd1-k141_40310	Circoviridae	1679	3.22505	23	29.43	38.48	3	3	0	Complete	100	DTR (medium-confidence)	0	1		1	33.33	151	34.73
TWd1-k141_38520	Unclassified Virus	4715	3.67348	38.3	5.92	52.2	6	5	0	High-quality	100	AAI-based (high-confidence)	0	1		1	16.67	80	30.64
TWd1-k141_37483	Microviridae	4320	3.63548	22.7	20.67	37.41	6	3	0	Complete	100	ITR (high-confidence)	0	1		1	16.67	282	64.01
TWd1-k141_36741	Unclassified Virus	3765	3.57576	24.8	38.48	47.49	3	1	0	High-quality	100	AAI-based (medium-confidence)	0	1		1	33.33	329	81.59
TWd1-k141_36451	Unclassified Virus	2329	3.36717	25.1	32.52	45.94	5	2	0	High-quality	100	AAI-based (medium-confidence)	0	1.05		1	20	214	53.71
TWd1-k141_36266	Microviridae	4703	3.67237	30.6	8.15	53.26	7	5	0	Complete	100	DTR (high-confidence)	0	1		1	14.29	86	26.32
TWd1-k141_35565	Unclassified Virus	3591	3.55522	35.5	9.77	43.69	4	3	0	High-quality	99.22	HMM-based (lower-bound)	0	1		1	25	110	39.05
TWd1-k141_33434	Unclassified Virus	3481	3.5417	29.5	22.13	33.38	4	2	0	High-quality	97.96	HMM-based (lower-bound)	0	1		1	25	229	67.56
TWd1-k141_3315	Microviridae	4520	3.65514	21.8	20.62	35	8	3	0	High-quality	100	AAI-based (medium-confidence)	0	1		1	12.5	285	62.13
TWd1-k141_31638	Circoviridae	2460	3.39094	32.9	31	48.17	3	2	0	High-quality	100	HMM-based (lower-bound)	0	1		1	33.33	177	58.23
TWd1-k141_28246	Unclassified Virus	3729	3.57159	0	0	28.51	5	2	0	High-quality	100	HMM-based (lower-bound)	0	1
TWd1-k141_27708	Microviridae	4367	3.64018	19.9	36.61	51.09	7	2	0	High-quality	99.4	AAI-based (high-confidence)	0	1		1	14.29	491	97.71
TWd1-k141_27455	Unclassified Virus	2464	3.39164	35.7	38.51	40.3	3	0	0	High-quality	100	AAI-based (high-confidence)	0	1	no viral genes detected	1	33.33	258	92.11
TWd1-k141_26500	Circoviridae	2232	3.34869	24.1	52.77	37.95	3	1	0	High-quality	98.2	AAI-based (medium-confidence)	0	1.05		1	33.33	286	68.93
TWd1-k141_25221	Unclassified Virus	2056	3.31302	62.7	22.6	47.86	4	0	0	High-quality	93.14	AAI-based (medium-confidence)	0	1	no viral genes detected	1	25	125	78.38
TWd1-k141_24868	Microviridae	4699	3.67201	31.1	6.2	56.57	7	5	0	High-quality	100	AAI-based (high-confidence)	0	1		1	14.29	84	26.12
TWd1-k141_24533	Circoviridae	2581	3.41179	28.3	23.88	30.41	5	4	0	High-quality	100	AAI-based (medium-confidence)	0	1		1	20	171	48.39
TWd1-k141_2367	Unclassified Virus	2229	3.34811	62.8	21.9	49.89	4	0	0	Complete	100	DTR (high-confidence)	0	1.1	no viral genes detected	1	25	115	72.22
TWd1-k141_2290	Circoviridae	2348	3.3707	25.7	29.65	50.6	3	3	0	High-quality	100	AAI-based (medium-confidence)	0	1		1	33.33	196	50.37
TWd1-k141_22226	Microviridae	5358	3.729	33.3	14.34	43.06	9	9	0	High-quality	100	AAI-based (high-confidence)	0	1		1	11.11	245	81.58
TWd1-k141_21669	Unknown	1874	3.27277	33.3	23.86	29.46	4	2	0	High-quality	100	AAI-based (medium-confidence)	0	1		1	25	131	43.62
TWd1-k141_19399	Unknown	4282	3.63165	31.1	11.04	37.65	7	6	0	High-quality	90.54	AAI-based (medium-confidence)	0	1		1	14.29	148	46.03
TWd1-k141_19373	Microviridae	4194	3.62263	37.3	7.43	34.02	6	4	0	High-quality	97.62	AAI-based (high-confidence)	0	1		1	16.67	95	35.43
TWd1-k141_19303	Unclassified Virus	2116	3.32552	27.5	52.63	42.39	2	0	0	High-quality	98.97	AAI-based (medium-confidence)	0	1	no viral genes detected	1	50	300	82.5
TWd1-k141_18831	Unclassified Virus	3295	3.51786	25.9	32.19	55.72	4	1	0	Complete	100	DTR (high-confidence)	0	1		1	25	310	80.29
TWd1-k141_18394	Circoviridae	1370	3.13672	43.8	91.76	55.33	2	1	0	Complete	100	DTR (high-confidence)	0	1		1	50	256	112.13
TWd1-k141_18242	Unclassified Virus	2912	3.46419	19.7	32.01	33.31	4	3	0	High-quality	90.43	HMM-based (lower-bound)	0	1		1	25	267	52.6
TWd1-k141_18133	Unclassified Virus	2279	3.35774	66.9	20.1	51.73	3	0	0	High-quality	100	AAI-based (medium-confidence)	0	1	no viral genes detected	1	33.33	119	79.61
TWd1-k141_17177	Unclassified Virus	3027	3.48101	23.7	29.68	42.75	5	1	0	High-quality	100	AAI-based (medium-confidence)	0	1		1	20	301	71.34
TWd1-k141_1610	Unclassified Virus	1937	3.28713	37	19.35	40.11	5	0	0	High-quality	96.57	AAI-based (medium-confidence)	0	1	no viral genes detected	1	20	101	37.37
TWd1-k141_13185	Unclassified Virus	2410	3.38202	26.2	50.11	45.1	3	1	0	High-quality	100	HMM-based (lower-bound)	0	1		1	33.33	234	61.31
TWd1-k141_13099	Unknown	2458	3.39058	0	0	41.01	5	2	0	High-quality	95.28	HMM-based (lower-bound)	0	1
TWd1-k141_12944	Circoviridae	2756	3.44028	22.3	42.73	36.87	3	2	0	High-quality	100	AAI-based (medium-confidence)	0	1		1	33.33	279	62.22
TWd1-k141_12152	Unknown	3210	3.50651	25.1	100	34.11	1	1	0	High-quality	98.2	HMM-based (lower-bound)	0	1		1	100	535	134.28
TWd1-k141_118	Unclassified Virus	2623	3.4188	28.4	46.54	30.12	3	0	0	Complete	100	DTR (high-confidence)	0	1.1	no viral genes detected	1	33.33	289	82.08
TWd1-k141_1169	Microviridae	5223	3.71792	35.6	9.01	50.09	11	4	0	High-quality	92.08	HMM-based (lower-bound)	0	1		1	9.09	154	54.82
TWd1-k141_11407	Unclassified Virus	2052	3.31218	25.9	48.64	28.85	2	1	0	High-quality	100	AAI-based (medium-confidence)	0	1.05		1	50	233	60.35
TWd1-k141_11253	Unclassified Virus	2002	3.30146	24.7	40	40.91	3	1	0	High-quality	95.42	AAI-based (medium-confidence)	0	1		1	33.33	202	49.89
T8S3-k141_65251	Unclassified Virus	3446	3.53732	22.4	29.76	48.55	5	1	0	Complete	100	DTR (high-confidence)	0	1	contig >1.5x longer than expected genome length	1	20	300	67.2
T8S3-k141_211882	Microviridae	4798	3.68106	32.5	9.83	47.92	7	7	0	High-quality	100	AAI-based (high-confidence)	0	1		1	14.29	145	47.12
T8S2-k141_79907	Unclassified Virus	2138	3.33001	43.6	7.58	47.9	3	2	0	High-quality	91.76	AAI-based (high-confidence)	0	1		1	33.33	45	19.62
T8S2-k141_60292	Unknown	7612	3.8815	0	0	34.06	5	1	0	High-quality	100	HMM-based (lower-bound)	0	1
T8S2-k141_223680	Microviridae	4301	3.63357	21.8	24.92	36.71	6	5	0	High-quality	94.46	AAI-based (high-confidence)	0	1		1	16.67	324	70.63
T8S2-k141_208991	Unclassified Virus	2619	3.41814	32.3	30.5	50.94	4	1	0	High-quality	100	HMM-based (lower-bound)	0	1		1	25	194	62.66
T8S2-k141_18924	Unclassified Virus	2271	3.35622	54.4	19.36	46.98	3	1	0	High-quality	100	HMM-based (lower-bound)	0	1.05		1	33.33	109	59.3
T8S2-k141_163601	Siphoviridae	29352	4.46764	26.4	1.1	50.17	39	10	0	High-quality	91.02	AAI-based (medium-confidence)	0	1		1	2.56	102	26.93
T8S2-k141_162685	Unclassified Virus	2287	3.35927	50	35.27	50.59	4	1	0	High-quality	100	AAI-based (medium-confidence)	0	1.05		1	25	194	97
T8S2-k141_154935	Unclassified Virus	3495	3.54345	22.8	33.66	48.53	3	1	0	High-quality	100	AAI-based (medium-confidence)	0	1	contig >1.5x longer than expected genome length	1	33.33	344	78.43
T8S2-k141_117001	Unclassified Virus	1994	3.29973	28.6	44.61	48.95	3	1	0	Complete	100	DTR (high-confidence)	0	1.1		1	33.33	244	69.78
T8S1-k141_74642	Podoviridae	36423	4.56138	28.6	1.05	38.22	40	15	0	Complete	100	DTR (high-confidence)	0	1		1	2.5	119	34.03
T8S1-k141_71325	Unclassified Virus	2996	3.47654	25.3	35.18	47.23	3	2	0	Complete	100	DTR (high-confidence)	0	1		1	33.33	279	70.59
T8S1-k141_428131	Unclassified Virus	2004	3.3019	23.8	50	46.26	3	3	0	Complete	100	DTR (medium-confidence)	0	1.1		1	33.33	295	70.21
T8S1-k141_427177	Circoviridae	2237	3.34967	33.8	22.68	46.67	3	2	0	Complete	100	DTR (high-confidence)	0	1.1		1	33.33	144	48.67
T8S1-k141_426463	Cruciviridae	4757	3.67733	25.4	28.41	47.89	5	3	0	Complete	100	DTR (high-confidence)	0	1		1	20	354	89.92
T8S1-k141_425436	Unclassified Virus	2750	3.43933	24.6	33.45	44.29	4	1	0	Complete	100	DTR (high-confidence)	0	1.05		1	25	282	69.37
T8S1-k141_425376	Unclassified Virus	2393	3.37894	23.6	50.75	52.49	3	1	0	Complete	100	DTR (high-confidence)	0	1.1		1	33.33	304	71.74
T8S1-k141_424677	Unclassified Virus	3013	3.479	23.8	30.79	46.9	4	1	0	Complete	100	DTR (high-confidence)	0	1		1	25	283	67.35
T8S1-k141_424630	Unclassified Virus	3913	3.59251	24.6	36.03	48.07	4	2	0	Complete	100	DTR (high-confidence)	0	1		1	25	423	104.06
T8S1-k141_424336	Unknown	4865	3.68708	32.8	7.5	53.5	6	5	0	Complete	100	DTR (high-confidence)	0	1		1	16.67	94	30.83
T8S1-k141_424080	Circoviridae	2108	3.32387	24.2	47.62	48.77	3	1	0	Complete	100	DTR (high-confidence)	0	1.1		1	33.33	300	72.6
T8S1-k141_423904	Circoviridae	3219	3.50772	22.6	30.25	43.68	6	2	0	Complete	100	DTR (medium-confidence)	0	1		1	16.67	294	66.44
T8S1-k141_423665	Microviridae	4703	3.67237	40.7	6.89	39.46	8	4	0	Complete	100	DTR (high-confidence)	0	1		1	12.5	102	41.51
T8S1-k141_423504	Unclassified Virus	4361	3.63959	25.3	26.58	40.43	8	2	0	Complete	100	DTR (high-confidence)	0	1		1	12.5	365	92.34
T8S1-k141_414990	Circoviridae	4499	3.65312	29.5	11.6	42.25	5	1	0	Complete	100	DTR (high-confidence)	0	1		1	20	151	44.55
T8S1-k141_402861	Siphoviridae	38459	4.585	36.2	0.51	53.44	62	34	0	High-quality	97.73	AAI-based (high-confidence)	0	1		1	1.61	61	22.08
T8S1-k141_395765	Unclassified Virus	3250	3.51188	0	0	48.89	5	1	0	High-quality	100	HMM-based (lower-bound)	0	1
T8S1-k141_392585	Unclassified Virus	4360	3.63949	23.4	21.64	59.17	5	2	0	Complete	100	DTR (high-confidence)	0	1		1	20	272	63.65
T8S1-k141_375092	Unknown	4764	3.67797	0	0	44.63	3	1	0	High-quality	100	HMM-based (lower-bound)	0	1
T8S1-k141_365459	Podoviridae	63666	4.80391	39.6	0.27	36.99	83	14	3	Complete	100	DTR (high-confidence)	0	1		1	1.2	54	21.38
T8S1-k141_364184	Unclassified Virus	2482	3.3948	22.3	44.43	30.3	3	1	0	High-quality	100	AAI-based (medium-confidence)	0	1		1	33.33	295	65.78
T8S1-k141_362223	Unknown	8969	3.95274	24.4	19.46	37.54	10	1	0	High-quality	100	HMM-based (lower-bound)	0	1		1	10	451	110.04
T8S1-k141_357372	Siphoviridae	33555	4.52576	31	0.98	37.67	55	10	0	High-quality	100	AAI-based (medium-confidence)	0	1		1	1.82	104	32.24
T8S1-k141_348502	Riboviria	9336	3.97016	21.5	27.76	49.49	4	2	0	High-quality	100	AAI-based (high-confidence)	0	1		1	25	727	156.31
T8S1-k141_324468	Microviridae	4460	3.64933	33.3	6.39	55.56	6	5	0	High-quality	98.03	AAI-based (high-confidence)	0	1		1	16.67	88	29.3
T8S1-k141_313845	Unclassified Virus	2371	3.37493	23.7	46.38	43.65	4	2	0	High-quality	100	AAI-based (medium-confidence)	0	1		1	25	340	80.58
T8S1-k141_307291	Unclassified Virus	4015	3.60369	24.4	32.64	42.02	7	2	0	High-quality	100	AAI-based (medium-confidence)	0	1		1	14.29	393	95.89
T8S1-k141_295521	Unknown	52360	4.719	41.9	0.37	43.98	73	13	0	High-quality	100	AAI-based (medium-confidence)	0	1		1	1.37	61	25.56
T8S1-k141_287049	Unclassified Virus	3472	3.54058	23.3	30.66	49.42	4	1	0	Complete	100	DTR (high-confidence)	0	1	contig >1.5x longer than expected genome length	1	25	314	73.16
T8S1-k141_279923	Unknown	58700	4.76864	29.2	0.44	49.76	78	10	0	High-quality	100	AAI-based (medium-confidence)	0	1		1	1.28	82	23.94
T8S1-k141_267782	Siphoviridae	31915	4.50399	50	0.39	39.33	55	11	1	Complete	100	DTR (high-confidence)	0	1		1	1.82	39	19.5
T8S1-k141_262939	Siphoviridae	34910	4.54295	46.2	0.63	39.77	52	10	0	Complete	100	DTR (high-confidence)	0	1		1	1.92	70	32.34
T8S1-k141_247217	Microviridae	5008	3.69966	36.7	5.98	37.28	7	3	0	Complete	100	DTR (high-confidence)	0	1		1	14.29	87	31.93
T8S1-k141_227461	Circoviridae	1962	3.2927	25.6	59.39	46.99	2	1	0	High-quality	93.95	AAI-based (high-confidence)	0	1		1	50	196	50.18
T8S1-k141_224389	Unknown	7781	3.89104	0	0	37.84	12	1	0	High-quality	100	HMM-based (lower-bound)	0	1
T8S1-k141_221010	Unclassified Virus	3013	3.479	24.7	35.78	46.2	3	3	0	High-quality	100	AAI-based (medium-confidence)	0	1		1	33.33	278	68.67
T8S1-k141_200266	Podoviridae	35943	4.55561	25.5	1.36	50.07	59	13	0	High-quality	93.92	AAI-based (high-confidence)	0	1		1	1.69	149	37.99
T8S1-k141_196289	Podoviridae	38073	4.58062	44.4	0.51	43.86	56	27	0	High-quality	91.68	AAI-based (high-confidence)	0	1		1	1.79	59	26.2
T8S1-k141_192956	Unclassified Virus	2939	3.4682	31.4	26.91	44.27	4	1	0	High-quality	100	HMM-based (lower-bound)	0	1		1	25	201	63.11
T8S1-k141_184068	Unclassified Virus	2792	3.44592	26.8	55.83	46.45	4	2	0	High-quality	98.31	HMM-based (lower-bound)	0	1		1	25	493	132.12
T8S1-k141_172337	Unclassified Virus	1899	3.27852	45.1	38.1	43.97	4	1	0	High-quality	97.14	AAI-based (medium-confidence)	0	1		1	25	208	93.81
T8S1-k141_168067	Unclassified Virus	2515	3.40054	30.2	44.95	40.8	4	1	0	High-quality	100	AAI-based (high-confidence)	0	1		1	25	294	88.79
T8S1-k141_160005	Unclassified Virus	3228	3.50893	24	30.46	46.38	4	1	0	Complete	100	DTR (high-confidence)	0	1		1	25	286	68.64
T8S1-k141_13536	Circoviridae	3770	3.57634	24.2	26.01	60.74	3	3	0	High-quality	100	AAI-based (medium-confidence)	0	1	contig >1.5x longer than expected genome length	1	33.33	218	52.76
T8S1-k141_129638	Unknown	8271	3.91756	0	0	50.59	6	1	0	High-quality	100	HMM-based (lower-bound)	0	1
T8S1-k141_12276	Unknown	1912	3.28149	0	0	35.41	3	2	0	Complete	100	DTR (medium-confidence)	0	1.1
T6S3-k141_334523	Unclassified Virus	2131	3.32858	31.1	37.72	33.69	3	1	0	High-quality	100	AAI-based (medium-confidence)	0	1		1	33.33	212	65.93
T6S3-k141_315133	Unclassified Virus	3289	3.51706	41.9	9.48	50.99	9	0	0	High-quality	100	AAI-based (high-confidence)	0	1	no viral genes detected	1	11.11	74	31.01
T6S2-k141_88127	Unclassified Virus	3605	3.55691	36.2	14.78	39.28	9	0	0	High-quality	100	AAI-based (medium-confidence)	0	1	no viral genes detected	1	11.11	157	56.83
T6S2-k141_55860	Unclassified Virus	3614	3.55799	26.5	16.38	56.17	10	0	0	High-quality	100	AAI-based (medium-confidence)	0	1	no viral genes detected; contig >1.5x longer than expected genome length	1	10	143	37.9
T6S2-k141_248491	Unclassified Virus	2290	3.35984	25.1	42.73	36.59	3	2	0	High-quality	96.47	HMM-based (lower-bound)	0	1		1	33.33	241	60.49
T6S2-k141_209912	Unclassified Virus	2530	3.40312	40.3	24.82	40.95	7	1	0	High-quality	90.2	AAI-based (medium-confidence)	0	1		1	14.29	176	70.93
T6S2-k141_208046	Unclassified Virus	1910	3.28103	28.6	35.53	56.65	5	0	0	High-quality	98.99	AAI-based (medium-confidence)	0	1	no viral genes detected	1	20	178	50.91
T6S2-k141_179082	Unknown	3634	3.56038	32.6	18.65	42.87	5	2	0	High-quality	100	AAI-based (medium-confidence)	0	1		1	20	160	52.16
T6S2-k141_155791	Unclassified Virus	3762	3.57542	42.9	8.13	53.83	8	0	0	High-quality	100	AAI-based (high-confidence)	0	1	no viral genes detected; contig >1.5x longer than expected genome length	1	12.5	73	31.32
T6S1-k141_92883	Unclassified Virus	1938	3.28735	37	20.19	47.94	3	3	0	Complete	100	DTR (high-confidence)	0	1		1	33.33	109	40.33
T6S1-k141_565711	Unclassified Virus	1888	3.276	25.4	41.14	32.31	3	1	0	Complete	100	DTR (high-confidence)	0	1.1		1	33.33	216	54.86
T6S1-k141_560119	Unclassified Virus	2223	3.34694	26.6	44.55	40.62	3	1	0	Complete	100	DTR (high-confidence)	0	1.1		1	33.33	278	73.95
T6S1-k141_557597	Unclassified Virus	2378	3.37621	49.1	14.79	49.66	4	0	0	Complete	100	DTR (high-confidence)	0	1.1	no viral genes detected	1	25	71	34.86
T6S1-k141_549192	Unclassified Virus	1844	3.26576	32.2	32.82	30.15	3	1	0	Complete	100	DTR (medium-confidence)	0	1.1		1	33.33	172	55.38
T6S1-k141_548329	Unknown	1918	3.28285	35.3	41.35	30.55	3	2	0	Complete	100	DTR (high-confidence)	0	1.1		1	33.33	215	75.89
T6S1-k141_547676	Unclassified Virus	2028	3.30707	29.3	31.67	33.97	3	2	0	Complete	100	DTR (medium-confidence)	0	1.1		1	33.33	184	53.91
T6S1-k141_504032	Unclassified Virus	2474	3.3934	46.9	10.3	50.93	7	0	0	High-quality	100	AAI-based (medium-confidence)	0	1	no viral genes detected	1	14.29	72	33.77
T6S1-k141_498504	Unclassified Virus	2369	3.37457	52.7	11.03	39.76	6	0	0	Complete	100	DTR (high-confidence)	0	1.1	no viral genes detected	1	16.67	72	37.94
T6S1-k141_453087	Circoviridae	5198	3.71584	23.1	23.9	40.59	5	1	0	High-quality	100	AAI-based (medium-confidence)	0	1		1	20	321	74.15
T6S1-k141_43937	Circoviridae	4572	3.66011	43.8	7.52	42.59	4	1	0	Complete	100	DTR (high-confidence)	0	1		1	25	100	43.8
T6S1-k141_439039	Parvoviridae	5841	3.76649	27.5	31.18	38.2	3	2	0	High-quality	94.58	HMM-based (lower-bound)	0	1		1	33.33	566	155.65
T6S1-k141_406540	Circoviridae	1903	3.27944	55.53	70.05	43.88	3	0	0	High-quality	100	AAI-based (medium-confidence)	0	1	no viral genes detected	2	66.67	145	80.52
T6S1-k141_360806	Unclassified Virus	2572	3.41027	34.4	30.44	42.53	4	0	0	High-quality	100	AAI-based (medium-confidence)	0	1	no viral genes detected	1	25	186	63.98
T6S1-k141_356350	Unclassified Virus	2365	3.37383	50.8	10.42	54.16	7	0	0	High-quality	100	AAI-based (high-confidence)	0	1	no viral genes detected	1	14.29	72	36.58
T6S1-k141_347255	Unknown	4697	3.67182	0	0	42.62	4	1	0	High-quality	100	HMM-based (lower-bound)	0	1
T6S1-k141_324589	Podoviridae	79560	4.90069	32	0.43	37.7	107	33	0	Complete	100	DTR (high-confidence)	0	1		1	0.93	108	34.56
T6S1-k141_298398	Unclassified Virus	7466	3.87309	26.3	25.61	36.49	10	1	0	Complete	100	DTR (high-confidence)	0	1		1	10	532	139.92
T6S1-k141_267168	Unclassified Virus	3883	3.58917	68.2	61.43	35.82	2	0	0	High-quality	100	AAI-based (high-confidence)	0	1	no viral genes detected; contig >1.5x longer than expected genome length	1	50	86	58.65
T6S1-k141_262961	Unclassified Virus	1904	3.27967	63.2	38.26	41.23	2	0	0	High-quality	100	AAI-based (medium-confidence)	0	1.05	no viral genes detected	1	50	57	36.02
T6S1-k141_259638	Unclassified Virus	2436	3.38668	40.5	12.56	52.26	6	0	0	Complete	100	DTR (high-confidence)	0	1.1	no viral genes detected	1	16.67	74	29.97
T6S1-k141_227590	Unclassified Virus	2371	3.37493	51.2	6.41	54.11	7	0	0	Complete	100	DTR (high-confidence)	0	1	no viral genes detected	1	14.29	44	22.53
T6S1-k141_221113	Circoviridae	1669	3.22246	50.7	100	46.14	1	0	0	High-quality	94.67	AAI-based (medium-confidence)	0	1	no viral genes detected	1	100	73	37.01
T6S1-k141_218687	Unclassified Virus	2326	3.36661	44.4	16.12	59.8	7	0	0	Complete	100	DTR (high-confidence)	0	1	no viral genes detected	1	14.29	118	52.39
T6S1-k141_191909	Circoviridae	1681	3.22557	70.8	31.18	45.75	3	1	0	High-quality	96.33	AAI-based (medium-confidence)	0	1		1	33.33	53	37.52
T6S1-k141_104719	Unclassified Virus	1928	3.28511	55.1	39.77	45.38	3	0	0	High-quality	100	AAI-based (medium-confidence)	0	1.1	no viral genes detected	1	33.33	70	38.57
T5S3-k141_96111	Myoviridae	42440	4.62778	30.6	0.63	52.77	67	39	0	High-quality	94.38	AAI-based (medium-confidence)	0	1		1	1.49	83	25.4
T5S3-k141_267932	Circoviridae	2137	3.3298	22.5	58.87	49.6	3	1	0	High-quality	91.7	AAI-based (medium-confidence)	0	1		1	33.33	272	61.2
T5S3-k141_233566	Podoviridae	40397	4.60635	36.5	0.84	52.83	35	8	0	High-quality	94.27	AAI-based (medium-confidence)	0	1		1	2.86	107	39.05
T5S3-k141_187773	Siphoviridae	50409	4.70251	36.2	0.39	53.55	80	44	0	High-quality	100	AAI-based (high-confidence)	0	1		1	1.25	61	22.08
T5S3-k141_102674	Unclassified Virus	2127	3.32777	22.4	48.26	50.26	3	2	0	High-quality	92.09	AAI-based (medium-confidence)	0	1		1	33.33	306	68.54
T5S2-k141_430698	Microviridae	4209	3.62418	37.1	7.06	34.9	7	6	0	High-quality	92.74	AAI-based (high-confidence)	0	1		1	14.29	84	31.16
T5S2-k141_390098	Unknown	7162	3.85503	0	0	36.34	9	1	0	High-quality	100	HMM-based (lower-bound)	0	1
T5S2-k141_360141	Microviridae	7931	3.89933	31.3	7.05	38.94	13	3	0	High-quality	98.69	AAI-based (medium-confidence)	0	1		1	7.69	171	53.52
T5S2-k141_180075	Unclassified Virus	3594	3.55558	23.9	36.65	50.25	3	2	0	High-quality	100	AAI-based (high-confidence)	0	1		1	33.33	298	71.22
T5S2-k141_154897	Microviridae	3875	3.58827	28.2	12.06	55.59	6	1	0	High-quality	95.07	AAI-based (high-confidence)	0	1		1	16.67	143	40.33
T5S2-k141_102499	Siphoviridae	39771	4.59957	33.3	0.47	47.47	64	33	0	High-quality	96.28	AAI-based (high-confidence)	0	1		1	1.56	57	18.98
T5S1-k141_97423	Myoviridae	21845	4.33935	29.7	1.5	24.92	30	4	0	Complete	100	DTR (medium-confidence)	0	1		1	3.33	102	30.29
T5S1-k141_96087	Microviridae	4385	3.64197	31.4	11.01	38.02	6	4	0	Complete	100	DTR (high-confidence)	0	1		1	16.67	147	46.16
T5S1-k141_88814	Siphoviridae	16731	4.22352	31	1.67	48.13	26	10	0	High-quality	100	AAI-based (high-confidence)	0	1		1	3.85	88	27.28
T5S1-k141_79756	Podoviridae	35909	4.5552	40.8	0.45	46.72	50	23	0	Complete	100	DTR (high-confidence)	0	1		1	2	52	21.22
T5S1-k141_78536	Unclassified Virus	2734	3.4368	25.3	55.87	54.79	3	1	0	High-quality	100	AAI-based (high-confidence)	0	1		1	33.33	376	95.13
T5S1-k141_743482	Unclassified Virus	2380	3.37658	40.2	25.68	57.98	7	0	0	Complete	100	DTR (high-confidence)	0	1.1	no viral genes detected	1	14.29	171	68.74
T5S1-k141_742636	Circoviridae	1889	3.27623	43.9	40.36	49.23	3	0	0	Complete	100	DTR (high-confidence)	0	1.1	no viral genes detected	1	33.33	111	48.73
T5S1-k141_742403	Unclassified Virus	2128	3.32797	28	37.11	54.46	3	2	0	Complete	100	DTR (medium-confidence)	0	1.1		1	33.33	216	60.48
T5S1-k141_742178	Circoviridae	1909	3.28081	24.9	45.95	29.81	4	1	0	Complete	100	DTR (medium-confidence)	0	1.1		1	25	238	59.26
T5S1-k141_741498	Unclassified Virus	2121	3.32654	31	29.09	56.11	3	2	0	Complete	100	DTR (medium-confidence)	0	1.1		1	33.33	167	51.77
T5S1-k141_740826	Unclassified Virus	2676	3.42749	31	20.27	41.93	3	1	0	Complete	100	DTR (high-confidence)	0	1.05		1	33.33	121	37.51
T5S1-k141_740604	Unknown	5601	3.74827	21.2	27.08	37.81	8	0	0	Complete	100	DTR (high-confidence)	0	1	no viral genes detected	1	12.5	439	93.07
T5S1-k141_740442	Unclassified Virus	4571	3.66001	25.7	19.74	48.44	6	2	0	Complete	100	DTR (high-confidence)	0	1		1	16.67	288	74.02
T5S1-k141_740014	Unclassified Virus	2002	3.30146	24	49.51	52.55	3	1	0	Complete	100	DTR (medium-confidence)	0	1.1		1	33.33	252	60.48
T5S1-k141_739897	Unclassified Virus	4185	3.6217	26.6	18.02	46.62	5	2	0	Complete	100	DTR (high-confidence)	0	1		1	20	227	60.38
T5S1-k141_739895	Unknown	5781	3.762	33.3	7.31	55.08	7	3	0	Complete	100	DTR (high-confidence)	0	1		1	14.29	121	40.29
T5S1-k141_739851	Unclassified Virus	4427	3.64611	21.9	26.89	39.48	7	2	0	Complete	100	DTR (high-confidence)	0	1		1	14.29	355	77.74
T5S1-k141_739833	Unclassified Virus	1927	3.28488	30.6	40.2	44.84	3	1	0	Complete	100	DTR (high-confidence)	0	1.1		1	33.33	203	62.12
T5S1-k141_739722	Unclassified Virus	3062	3.48601	26	32.11	41.61	3	1	0	Complete	100	DTR (high-confidence)	0	1		1	33.33	280	72.8
T5S1-k141_739700	Unclassified Virus	4693	3.67145	32.3	10.52	42.49	8	6	0	Complete	100	DTR (high-confidence)	0	1		1	12.5	156	50.39
T5S1-k141_739694	Circoviridae	2555	3.40739	41.1	8.58	41.84	3	0	0	Complete	100	DTR (high-confidence)	0	1.05	no viral genes detected	1	33.33	53	21.78
T5S1-k141_739681	Unclassified Virus	2124	3.32715	22	60.87	49.58	2	2	0	Complete	100	DTR (medium-confidence)	0	1.1		1	50	364	80.08
T5S1-k141_739630	Unclassified Virus	2135	3.3294	33.3	41.84	37.75	3	1	0	Complete	100	DTR (medium-confidence)	0	1.1		1	33.33	246	81.92
T5S1-k141_739530	Unknown	6149	3.7888	31	11.72	56.24	10	1	0	Complete	100	DTR (high-confidence)	0	1		1	10	218	67.58
T5S1-k141_739412	Unknown	5916	3.77203	44.1	3.53	45.22	7	3	0	Complete	100	DTR (high-confidence)	0	1		1	14.29	63	27.78
T5S1-k141_739314	Unknown	5932	3.7732	28.7	13.12	53.39	6	1	0	Complete	100	DTR (high-confidence)	0	1		1	16.67	209	59.98
T5S1-k141_739299	Unclassified Virus	1995	3.29994	28	27.5	33.28	3	3	0	Complete	100	DTR (high-confidence)	0	1.1		1	33.33	165	46.2
T5S1-k141_739283	Siphoviridae	36852	4.56646	49.1	0.5	29.38	66	8	0	Complete	100	DTR (high-confidence)	0	1		1	1.52	57	27.99
T5S1-k141_739260	Unclassified Virus	4491	3.65234	32.7	10.57	43.82	7	6	0	Complete	100	DTR (high-confidence)	0	1		1	14.29	146	47.74
T5S1-k141_739211	Microviridae	5463	3.73743	32.8	9.11	39.89	7	5	0	Complete	100	DTR (high-confidence)	0	1		1	14.29	157	51.5
T5S1-k141_739138	Siphoviridae	36256	4.55938	45.2	0.67	43.87	62	8	0	Complete	100	DTR (high-confidence)	0	1		1	1.61	77	34.8
T5S1-k141_739109	Microviridae	4443	3.64768	43.8	8.25	42.76	5	5	0	Complete	100	DTR (high-confidence)	0	1		1	20	110	48.18
T5S1-k141_739086	Unclassified Virus	2228	3.34792	24.5	51.59	49.42	3	2	0	Complete	100	DTR (high-confidence)	0	1.1		1	33.33	341	83.55
T5S1-k141_737752	Unclassified Virus	4594	3.66219	43.8	7.53	41.79	5	1	0	Complete	100	ITR (high-confidence)	0	1		1	20	94	41.17
T5S1-k141_70165	Podoviridae	37568	4.57482	30.9	0.81	45.88	55	29	0	High-quality	93.04	AAI-based (high-confidence)	0	1		1	1.82	93	28.74
T5S1-k141_699722	Myoviridae	43982	4.64327	36.7	0.45	39.52	61	36	0	Complete	100	DTR (high-confidence)	0	1		1	1.64	61	22.39
T5S1-k141_699425	Unknown	6607	3.82	34.7	5.52	57.08	8	1	0	Complete	100	DTR (high-confidence)	0	1		1	12.5	100	34.7
T5S1-k141_697996	Siphoviridae	43958	4.64304	28.8	0.85	42.15	64	44	0	High-quality	95.83	AAI-based (high-confidence)	0	1		1	1.56	118	33.98
T5S1-k141_692113	Unknown	6227	3.79428	29.5	12.35	55.42	9	2	0	High-quality	100	AAI-based (medium-confidence)	0	1		1	11.11	234	69.03
T5S1-k141_691311	Unclassified Virus	3315	3.52048	28	33.33	55.57	5	2	0	High-quality	100	AAI-based (medium-confidence)	0	1		1	20	261	73.08
T5S1-k141_668565	Podoviridae	39208	4.59337	28.9	0.58	39.34	63	19	0	High-quality	100	AAI-based (medium-confidence)	0	1		1	1.59	68	19.65
T5S1-k141_653947	Microviridae	5154	3.71214	34.8	9.9	42.92	8	6	0	High-quality	100	AAI-based (high-confidence)	0	1		1	12.5	152	52.9
T5S1-k141_653015	Podoviridae	45371	4.65678	30.7	0.51	46.5	67	20	1	High-quality	100	AAI-based (medium-confidence)	0	1		1	1.49	73	22.41
T5S1-k141_648773	Myoviridae	35691	4.55256	43.9	0.74	43.09	51	5	2	High-quality	100	AAI-based (medium-confidence)	0	1		1	1.96	83	36.44
T5S1-k141_647077	Podoviridae	35406	4.54908	35.2	0.49	45.94	64	29	0	Complete	100	ITR (high-confidence)	0	1		1	1.56	56	19.71
T5S1-k141_646968	Circoviridae	4688	3.67099	23.7	27.18	42.3	3	1	0	High-quality	100	AAI-based (medium-confidence)	0	1	contig >1.5x longer than expected genome length	1	33.33	321	76.08
T5S1-k141_617264	Unclassified Virus	2655	3.42406	25.5	36.83	53.15	6	0	0	High-quality	100	AAI-based (high-confidence)	0	1	no viral genes detected	1	16.67	302	77.01
T5S1-k141_616033	Unknown	4356	3.63909	34.5	9.84	32.16	7	4	0	Complete	100	DTR (medium-confidence)	0	1		1	14.29	132	45.54
T5S1-k141_61565	Unclassified Virus	3047	3.48387	23.4	33.04	39.84	3	3	0	Complete	100	DTR (high-confidence)	0	1		1	33.33	259	60.61
T5S1-k141_612792	Unknown	3108	3.49248	0	0	32.21	2	1	0	High-quality	95.07	HMM-based (lower-bound)	0	1
T5S1-k141_60396	Podoviridae	37976	4.57951	44.4	0.45	37.17	47	13	0	High-quality	100	AAI-based (medium-confidence)	0	1		1	2.13	51	22.64
T5S1-k141_588212	Siphoviridae	50330	4.70183	30.8	0.43	50.35	89	29	0	High-quality	100	AAI-based (medium-confidence)	0	1		1	1.12	66	20.33
T5S1-k141_584922	Podoviridae	100180	5.00078	31	0.31	29.2	129	21	1	High-quality	95.2	HMM-based (lower-bound)	0	1		1	0.78	93	28.83
T5S1-k141_579179	Myoviridae	98922	4.99529	24.1	0.31	34.79	155	49	0	High-quality	98.95	AAI-based (medium-confidence)	0	1		1	0.65	89	21.45
T5S1-k141_578466	Microviridae	4359	3.63939	30.3	11.24	54.58	6	1	0	Complete	100	DTR (high-confidence)	0	1		1	16.67	145	43.94
T5S1-k141_573874	Microviridae	4881	3.68851	31.3	6.67	43.88	7	6	0	High-quality	100	AAI-based (high-confidence)	0	1		1	14.29	99	30.99
T5S1-k141_571971	Siphoviridae	32691	4.51443	23.3	1.48	37.76	60	9	0	Complete	100	DTR (high-confidence)	0	1		1	1.67	149	34.72
T5S1-k141_562481	Unclassified Virus	5259	3.7209	41.3	9.79	36	14	0	0	High-quality	100	AAI-based (high-confidence)	0	1	no viral genes detected	1	7.14	144	59.47
T5S1-k141_534224	Podoviridae	41311	4.61607	37.3	0.63	51.82	54	25	0	High-quality	96.78	AAI-based (medium-confidence)	0	1		1	1.85	80	29.84
T5S1-k141_500999	Unknown	1989	3.29863	25.3	100	42.74	1	1	0	High-quality	94.56	AAI-based (medium-confidence)	0	1		1	100	355	89.81
T5S1-k141_495589	Podoviridae	13366	4.126	32.5	3.23	39.63	20	4	0	Complete	100	DTR (high-confidence)	0	1		1	5	138	44.85
T5S1-k141_494522	Unknown	6092	3.78476	35.5	5.24	36.2	10	0	0	High-quality	96.29	AAI-based (medium-confidence)	0	1	no viral genes detected	1	10	93	33.02
T5S1-k141_484871	Unclassified Virus	2832	3.45209	38.6	8.36	49.75	6	0	0	High-quality	100	AAI-based (high-confidence)	0	1	no viral genes detected	1	16.67	59	22.77
T5S1-k141_484269	Siphoviridae	37448	4.57343	30.8	0.86	39.8	50	16	0	High-quality	100	AAI-based (medium-confidence)	0	1		1	2	99	30.49
T5S1-k141_477214	Unclassified Virus	2360	3.37291	41.9	10.93	49.32	7	0	0	Complete	100	DTR (high-confidence)	0	1	no viral genes detected	1	14.29	73	30.59
T5S1-k141_472990	Unknown	6010	3.77887	22.9	24.1	39.68	8	4	0	Complete	100	DTR (high-confidence)	0	1		1	12.5	436	99.84
T5S1-k141_472718	Siphoviridae	50719	4.70517	34.4	0.64	37.72	85	10	0	Complete	100	ITR (high-confidence)	0	1		1	1.18	97	33.37
T5S1-k141_464251	Siphoviridae	42817	4.63162	42.9	0.52	49.23	76	27	0	High-quality	90.81	AAI-based (medium-confidence)	0	1		1	1.32	68	29.17
T5S1-k141_453450	Siphoviridae	42391	4.62727	39.3	0.51	30.5	83	16	0	Complete	100	DTR (high-confidence)	0	1		1	1.2	67	26.33
T5S1-k141_445422	Myoviridae	47603	4.67763	24.2	1.04	34.96	58	19	0	High-quality	94.37	AAI-based (high-confidence)	0	1		1	1.72	155	37.51
T5S1-k141_444551	Podoviridae	45428	4.65732	33.9	0.57	46.41	57	27	1	High-quality	91.79	AAI-based (medium-confidence)	0	1		1	1.75	81	27.46
T5S1-k141_442808	Circoviridae	3110	3.49276	57	29.86	39.39	5	0	0	High-quality	100	AAI-based (medium-confidence)	0	1	no viral genes detected; contig >1.5x longer than expected genome length	1	20	83	47.31
T5S1-k141_425748	Myoviridae	43765	4.64113	32	0.45	39.78	84	35	0	Complete	100	ITR (high-confidence)	0	1		1	1.19	60	19.2
T5S1-k141_418469	Unclassified Virus	2698	3.43104	56.3	8.51	51.74	6	0	0	High-quality	100	AAI-based (medium-confidence)	0	1	no viral genes detected	1	16.67	57	32.09
T5S1-k141_417113	Unknown	5886	3.76982	0	0	38.63	6	2	0	High-quality	96.05	HMM-based (lower-bound)	0	1
T5S1-k141_413311	Unclassified Virus	3187	3.50338	24.3	43.84	43.68	7	0	0	High-quality	100	AAI-based (high-confidence)	0	1	no viral genes detected	1	14.29	338	82.13
T5S1-k141_400471	Siphoviridae	24630	4.39146	25.2	1.98	31.59	32	5	1	High-quality	100	AAI-based (high-confidence)	0	1		1	3.12	151	38.05
T5S1-k141_399595	Unclassified Virus	1833	3.26316	48.6	33.92	42.66	5	0	0	High-quality	100	AAI-based (medium-confidence)	0	1	no viral genes detected	1	20	116	56.38
T5S1-k141_382578	Unclassified Virus	1392	3.14364	49.4	84.15	50.14	2	1	0	High-quality	100	AAI-based (medium-confidence)	0	1		1	50	239	118.07
T5S1-k141_380584	Unknown	6088	3.78447	32.5	11.96	53.83	8	1	0	High-quality	100	AAI-based (medium-confidence)	0	1		1	12.5	203	65.97
T5S1-k141_369600	Unknown	7081	3.85009	0	0	37.72	8	1	0	High-quality	100	HMM-based (lower-bound)	0	1
T5S1-k141_368263	Podoviridae	69566	4.8424	30	0.44	41.47	86	27	0	High-quality	94.44	AAI-based (high-confidence)	0	1		1	1.16	97	29.1
T5S1-k141_364861	Podoviridae	50170	4.70044	27.1	0.73	42.87	69	30	0	High-quality	100	AAI-based (high-confidence)	0	1		1	1.45	114	30.89
T5S1-k141_347857	Microviridae	6476	3.81131	29.4	10.77	54.82	7	1	0	High-quality	100	AAI-based (medium-confidence)	0	1		1	14.29	202	59.39
T5S1-k141_346617	Podoviridae	35247	4.54712	32.9	0.69	48.19	44	17	0	High-quality	100	AAI-based (medium-confidence)	0	1		1	2.27	77	25.33
T5S1-k141_346049	Myoviridae	46120	4.66389	24.8	0.96	40.86	56	16	0	High-quality	96.49	AAI-based (medium-confidence)	0	1		1	1.79	140	34.72
T5S1-k141_345446	Myoviridae	48411	4.68494	24.2	0.83	43.4	64	10	1	High-quality	100	AAI-based (medium-confidence)	0	1		1	1.56	129	31.22
T5S1-k141_341497	Autographiviridae	45881	4.66163	30.7	0.82	53.43	55	20	0	Complete	100	DTR (high-confidence)	0	1		1	1.82	117	35.92
T5S1-k141_336859	Podoviridae	12750	4.10551	25.2	2.92	31.24	20	4	0	High-quality	93.46	AAI-based (medium-confidence)	0	1		1	5	120	30.24
T5S1-k141_334057	Unknown	6827	3.83423	31.7	5.65	41.22	12	1	0	Complete	100	DTR (medium-confidence)	0	1		1	8.33	115	36.45
T5S1-k141_332321	Unclassified Virus	5040	3.70243	23.2	17.43	58.31	6	3	0	High-quality	100	AAI-based (medium-confidence)	0	1		1	16.67	264	61.25
T5S1-k141_319431	Unclassified Virus	2069	3.31576	24.1	48.42	46.16	3	2	0	High-quality	93.96	AAI-based (medium-confidence)	0	1		1	33.33	276	66.52
T5S1-k141_312112	Podoviridae	38864	4.58955	32.9	0.71	43.72	66	29	0	Complete	100	DTR (high-confidence)	0	1		1	1.52	82	26.98
T5S1-k141_301523	Siphoviridae	34209	4.53414	33	1.04	49.33	49	28	0	High-quality	98.32	AAI-based (high-confidence)	0	1		1	2.04	115	37.95
T5S1-k141_294629	Podoviridae	93597	4.97126	22.6	0.49	32.14	107	28	0	High-quality	100	AAI-based (medium-confidence)	0	1		1	0.93	138	31.19
T5S1-k141_258518	Unclassified Virus	4969	3.69627	25.1	20.61	43.65	8	1	0	High-quality	100	AAI-based (high-confidence)	0	1		1	12.5	305	76.56
T5S1-k141_25227	Unclassified Virus	4647	3.66717	25.5	20.8	55.71	6	2	0	Complete	100	DTR (high-confidence)	0	1		1	16.67	287	73.19
T5S1-k141_244567	Siphoviridae	43294	4.63643	38.7	0.48	44.67	62	32	0	High-quality	97.53	AAI-based (high-confidence)	0	1		1	1.61	63	24.38
T5S1-k141_236256	Siphoviridae	38183	4.58187	37.7	0.69	32.96	60	10	0	High-quality	94.36	AAI-based (medium-confidence)	0	1		1	1.67	79	29.78
T5S1-k141_229792	Unknown	6536	3.81531	29.7	11.75	54.15	9	2	0	Complete	100	DTR (high-confidence)	0	1		1	11.11	229	68.01
T5S1-k141_229601	Unknown	5256	3.72066	52.5	2.65	48.54	8	2	0	Complete	100	DTR (medium-confidence)	0	1		1	12.5	42	22.05
T5S1-k141_229273	Siphoviridae	32577	4.51291	45.5	0.5	37.75	50	15	0	High-quality	97.08	AAI-based (medium-confidence)	0	1		1	2	50	22.75
T5S1-k141_227594	Myoviridae	122214	5.08712	37	0.15	40.47	229	74	0	High-quality	91.02	AAI-based (high-confidence)	0	1		1	0.44	55	20.35
T5S1-k141_225693	Podoviridae	69862	4.84424	30.4	0.53	40.29	90	33	3	Complete	100	DTR (high-confidence)	0	1		1	1.11	109	33.14
T5S1-k141_220031	Siphoviridae	87484	4.94193	25.5	0.46	46.33	122	20	2	High-quality	100	AAI-based (medium-confidence)	0	1		1	0.82	127	32.38
T5S1-k141_219485	Autographiviridae	48609	4.68672	28	0.63	42.69	61	25	0	High-quality	100	AAI-based (high-confidence)	0	1		1	1.64	98	27.44
T5S1-k141_213190	Circoviridae	3846	3.58501	32.6	27.68	46.36	4	1	0	High-quality	100	AAI-based (medium-confidence)	0	1		1	25	155	50.53
T5S1-k141_211947	Podoviridae	35475	4.54992	40	0.58	50.31	51	22	0	Complete	100	DTR (high-confidence)	0	1		1	1.96	66	26.4
T5S1-k141_211930	Microviridae	5005	3.6994	21.7	20.3	45.01	7	6	0	High-quality	100	AAI-based (high-confidence)	0	1		1	14.29	309	67.05
T5S1-k141_187253	Unclassified Virus	3385	3.52956	25.5	28.51	53.47	6	0	0	High-quality	100	AAI-based (high-confidence)	0	1	no viral genes detected	1	16.67	213	54.31
T5S1-k141_181649	Siphoviridae	28138	4.44929	45.1	0.83	49.69	40	12	1	Complete	100	DTR (medium-confidence)	0	1		1	2.5	74	33.37
T5S1-k141_18163	Podoviridae	49719	4.69652	50	0.31	44.03	74	30	1	Complete	100	DTR (high-confidence)	0	1		1	1.35	48	24
T5S1-k141_159677	Unclassified Virus	2678	3.42781	44.1	20.17	54.52	4	0	0	High-quality	99.81	AAI-based (high-confidence)	0	1	no viral genes detected	1	25	119	52.48
T5S1-k141_155765	Circoviridae	1666	3.22167	27.4	35.78	46.16	3	0	0	Complete	100	DTR (medium-confidence)	0	1.1	no viral genes detected	1	33.33	161	44.11
T5S1-k141_152340	Unclassified Virus	2846	3.45423	42.1	21.31	59.56	9	0	0	High-quality	100	AAI-based (high-confidence)	0	1	no viral genes detected	1	11.11	169	71.15
T5S1-k141_125013	Microviridae	4170	3.62014	30.7	10.43	53.79	5	3	0	High-quality	100	AAI-based (medium-confidence)	0	1		1	20	126	38.68
T5S1-k141_124526	Unclassified Virus	4651	3.66755	30.1	12.98	59.9	13	0	0	Complete	100	DTR (high-confidence)	0	1	no viral genes detected; contig >1.5x longer than expected genome length	1	7.69	191	57.49
T5S1-k141_117155	Unknown	5882	3.76953	24.3	23.03	57.87	6	1	0	Complete	100	DTR (high-confidence)	0	1		1	16.67	407	98.9
T5S1-k141_116757	Podoviridae	34992	4.54397	46.7	0.42	39.62	63	15	0	High-quality	98.55	AAI-based (medium-confidence)	0	1		1	1.59	47	21.95
T5S1-k141_114996	Myoviridae	42668	4.6301	27.1	1.03	43.23	55	25	0	Complete	100	DTR (high-confidence)	0	1		1	1.82	140	37.94
T5S1-k141_111590	Unknown	6254	3.79616	29.8	11.91	55.53	9	1	0	Complete	100	DTR (high-confidence)	0	1		1	11.11	216	64.37
T4S3-k141_246996	Unknown	4438	3.64719	0	0	36.71	7	1	0	High-quality	100	HMM-based (lower-bound)	0	1
T4S2-k141_87957	Unclassified Virus	2157	3.33385	26.2	36.77	39.17	3	2	0	High-quality	100	AAI-based (medium-confidence)	0	1		1	33.33	196	51.35
T4S2-k141_74369	Unclassified Virus	3398	3.53122	63.55	24.42	49.79	6	0	0	High-quality	100	AAI-based (medium-confidence)	0	1	no viral genes detected; contig >1.5x longer than expected genome length	2	33.33	230	146.16
T4S2-k141_505761	Unclassified Virus	1896	3.27784	32.7	29.77	39.93	3	3	0	Complete	100	DTR (high-confidence)	0	1.1		1	33.33	167	54.61
T4S2-k141_502360	Circoviridae	2465	3.39182	23.2	48.49	46.53	3	1	0	Complete	100	DTR (high-confidence)	0	1.1		1	33.33	305	70.76
T4S2-k141_464498	Riboviria	4148	3.61784	0	0	44.07	1	1	0	High-quality	99.68	HMM-based (lower-bound)	0	1
T4S2-k141_457446	Microviridae	5216	3.71734	26.5	16.66	46.22	10	7	0	High-quality	100	AAI-based (high-confidence)	0	1		1	10	264	69.96
T4S2-k141_18664	Siphoviridae	42585	4.62926	34.4	0.52	53.7	51	25	0	High-quality	92.72	AAI-based (high-confidence)	0	1		1	1.96	70	24.08
T4S2-k141_155429	Circoviridae	1847	3.26647	39.6	11.94	33.57	4	3	0	High-quality	90.41	AAI-based (medium-confidence)	0	1		1	25	69	27.32
T4S1-k141_99374	Autographiviridae	44280	4.64621	38.5	0.73	50.67	59	17	0	High-quality	95.6	AAI-based (high-confidence)	0	1		1	1.69	101	38.88
T4S1-k141_92574	Myoviridae	85427	4.9316	32.7	0.23	39.56	127	40	0	Complete	100	DTR (medium-confidence)	0	1		1	0.79	59	19.29
T4S1-k141_90257	Unclassified Virus	2361	3.3731	68.1	10.55	48.71	5	0	0	High-quality	100	AAI-based (medium-confidence)	0	1	no viral genes detected	1	20	69	46.99
T4S1-k141_857143	Unclassified Virus	2295	3.36078	26.4	22.53	41.96	3	2	0	Complete	100	DTR (high-confidence)	0	1.1		1	33.33	146	38.54
T4S1-k141_856103	Unclassified Virus	2511	3.39985	24.1	55.14	46.12	3	2	0	Complete	100	DTR (high-confidence)	0	1.1		1	33.33	322	77.6
T4S1-k141_855886	Unclassified Virus	2361	3.3731	47.4	9.64	50.91	7	0	0	Complete	100	DTR (high-confidence)	0	1.1	no viral genes detected	1	14.29	72	34.13
T4S1-k141_855665	Unclassified Virus	2003	3.30168	33.3	22.77	44.38	5	2	0	Complete	100	DTR (high-confidence)	0	1.1		1	20	120	39.96
T4S1-k141_855551	Unknown	2422	3.38417	28.7	54.88	39.8	2	1	0	Complete	100	DTR (high-confidence)	0	1.1		1	50	225	64.58
T4S1-k141_854977	Unclassified Virus	2699	3.4312	22.6	44.92	50.87	3	2	0	Complete	100	DTR (high-confidence)	0	1.05		1	33.33	292	65.99
T4S1-k141_854650	Unknown	6466	3.81064	43.3	3.5	51.38	9	1	0	Complete	100	DTR (high-confidence)	0	1		1	11.11	65	28.14
T4S1-k141_854210	Microviridae	5963	3.77546	29.6	26.4	44.83	6	3	0	Complete	100	DTR (high-confidence)	0	1		1	16.67	439	129.94
T4S1-k141_854189	Unclassified Virus	2584	3.41229	20.9	52.13	50.54	2	1	0	Complete	100	DTR (high-confidence)	0	1.1		1	50	330	68.97
T4S1-k141_853879	Circoviridae	2522	3.40175	22.6	44.74	43.34	3	1	0	Complete	100	DTR (high-confidence)	0	1.1		1	33.33	302	68.25
T4S1-k141_853711	Unclassified Virus	2333	3.36791	39	25.57	45.86	5	0	0	Complete	100	DTR (high-confidence)	0	1.1	no viral genes detected	1	20	179	69.81
T4S1-k141_853673	Microviridae	5672	3.75374	23	17.92	36.2	8	3	0	Complete	100	DTR (high-confidence)	0	1		1	12.5	307	70.61
T4S1-k141_82848	Unclassified Virus	2383	3.37712	26.2	48.7	41.63	7	0	0	Complete	100	DTR (medium-confidence)	0	1.1	no viral genes detected	1	14.29	338	88.56
T4S1-k141_823863	Siphoviridae	51209	4.70935	41.6	0.51	43.06	81	30	0	High-quality	100	AAI-based (medium-confidence)	0	1		1	1.23	80	33.28
T4S1-k141_806703	Podoviridae	44136	4.64479	35.1	0.51	46.2	53	22	0	High-quality	96.12	AAI-based (high-confidence)	0	1		1	1.89	70	24.57
T4S1-k141_79710	Riboviria	4460	3.64933	31.5	46.59	43.79	3	1	0	High-quality	100	AAI-based (medium-confidence)	0	1		1	33.33	628	197.82
T4S1-k141_788041	Unknown	6055	3.78211	23.1	29.61	51.89	8	1	0	High-quality	100	AAI-based (medium-confidence)	0	1		1	12.5	517	119.43
T4S1-k141_787985	Myoviridae	47222	4.67414	26.6	0.94	47.41	75	39	0	Complete	100	DTR (high-confidence)	0	1		1	1.33	134	35.64
T4S1-k141_779499	Myoviridae	87557	4.94229	32.9	0.39	37.1	117	52	1	High-quality	96.99	AAI-based (high-confidence)	0	1		1	0.85	101	33.23
T4S1-k141_776450	Podoviridae	47025	4.67233	29.6	0.86	40.92	69	24	0	High-quality	95.37	AAI-based (medium-confidence)	0	1		1	1.45	120	35.52
T4S1-k141_771414	Podoviridae	71283	4.85299	51.3	0.19	37.59	80	38	0	Complete	100	DTR (high-confidence)	0	1		1	1.25	43	22.06
T4S1-k141_74648	Microviridae	7932	3.89938	34.8	3.57	45.57	9	8	0	High-quality	100	AAI-based (high-confidence)	0	1	contig >1.5x longer than expected genome length	1	11.11	92	32.02
T4S1-k141_705330	Circoviridae	2900	3.4624	25.8	50.34	47.79	3	1	0	High-quality	100	AAI-based (medium-confidence)	0	1		1	33.33	147	37.93
T4S1-k141_703661	Podoviridae	45735	4.66025	29.9	0.53	48.06	84	31	0	High-quality	100	AAI-based (high-confidence)	0	1		1	1.19	75	22.43
T4S1-k141_703630	Unclassified Virus	2527	3.40261	29.3	28.69	61.38	6	0	0	Complete	100	DTR (high-confidence)	0	1.1	no viral genes detected	1	16.67	212	62.12
T4S1-k141_685653	Unclassified Virus	3500	3.54407	68.2	100	35.66	1	0	0	High-quality	100	AAI-based (high-confidence)	0	1	no viral genes detected; contig >1.5x longer than expected genome length	1	100	86	58.65
T4S1-k141_672536	Riboviria	3931	3.5945	32.2	49.79	48.33	3	1	0	High-quality	100	AAI-based (medium-confidence)	0	1		1	33.33	607	195.45
T4S1-k141_653241	Microviridae	4441	3.64748	34.7	7.01	39.59	6	3	0	High-quality	96.47	AAI-based (medium-confidence)	0	1		1	16.67	91	31.58
T4S1-k141_653237	Siphoviridae	56280	4.75035	40.4	0.34	60.22	77	18	0	High-quality	93.84	AAI-based (high-confidence)	0	1		1	1.3	60	24.24
T4S1-k141_651325	Unknown	8019	3.90412	0	0	36.8	10	1	0	High-quality	100	HMM-based (lower-bound)	0	1
T4S1-k141_649601	Siphoviridae	78261	4.89355	27.3	0.66	32.81	103	16	0	High-quality	97.19	AAI-based (medium-confidence)	0	1		1	0.97	155	42.31
T4S1-k141_63506	Unclassified Virus	2695	3.43056	47.8	13.25	54.99	5	0	0	Complete	100	DTR (high-confidence)	0	1.05	no viral genes detected	1	20	84	40.15
T4S1-k141_63256	Podoviridae	71787	4.85605	24.8	0.67	42.35	109	34	0	High-quality	96.87	AAI-based (high-confidence)	0	1		1	0.92	153	37.94
T4S1-k141_620215	Circoviridae	2775	3.44326	62	100	37.08	2	0	0	High-quality	100	AAI-based (high-confidence)	0	1	no viral genes detected; contig >1.5x longer than expected genome length	2	100	162	100.44
T4S1-k141_617227	Unclassified Virus	2854	3.45545	0	0	44.57	5	2	0	High-quality	98.38	HMM-based (lower-bound)	0	1
T4S1-k141_612285	Podoviridae	46650	4.66885	29.6	0.73	51.14	67	21	0	High-quality	90.85	AAI-based (medium-confidence)	0	1		1	1.49	105	31.08
T4S1-k141_610316	Unknown	7386	3.86841	44.4	2.93	51.68	12	1	0	High-quality	100	AAI-based (medium-confidence)	0	1		1	8.33	61	27.08
T4S1-k141_594034	Podoviridae	47101	4.67303	34.2	0.51	51.55	67	20	0	Complete	100	DTR (high-confidence)	0	1		1	1.49	75	25.65
T4S1-k141_593660	Unclassified Virus	2056	3.31302	42.5	13.83	48.25	5	0	0	High-quality	90.39	AAI-based (medium-confidence)	0	1	no viral genes detected	1	20	73	31.02
T4S1-k141_588655	Podoviridae	40130	4.60347	32	0.77	48.18	67	16	0	High-quality	94.79	AAI-based (medium-confidence)	0	1		1	1.49	98	31.36
T4S1-k141_576886	Microviridae	4289	3.63236	35.1	7.24	41.69	6	5	0	High-quality	91.3	AAI-based (high-confidence)	0	1		1	16.67	99	34.75
T4S1-k141_575687	Podoviridae	13484	4.12982	31	3.53	35.92	18	7	0	Complete	100	DTR (high-confidence)	0	1		1	5.56	139	43.09
T4S1-k141_570512	Podoviridae	51014	4.70769	25.2	0.86	53.72	59	20	1	High-quality	100	AAI-based (medium-confidence)	0	1		1	1.69	138	34.78
T4S1-k141_555490	Microviridae	4468	3.65011	33.3	6.17	34	7	7	0	High-quality	97.95	AAI-based (high-confidence)	0	1		1	14.29	84	27.97
T4S1-k141_549924	Unknown	4595	3.66229	0	0	48.34	3	1	0	Complete	100	ITR (high-confidence)	0	1
T4S1-k141_538839	Unknown	7338	3.86558	52.5	5.53	43.35	12	5	0	Complete	100	DTR (high-confidence)	0	1		1	8.33	129	67.72
T4S1-k141_527788	Circoviridae	2368	3.37438	25	44.48	36.49	2	2	0	High-quality	98.47	AAI-based (medium-confidence)	0	1		1	50	270	67.5
T4S1-k141_526099	Unknown	7112	3.85199	0	0	36.85	9	1	0	Complete	100	DTR (high-confidence)	0	1
T4S1-k141_518916	Podoviridae	70930	4.85083	43.8	0.29	34.96	88	34	0	Complete	100	DTR (high-confidence)	0	1		1	1.14	66	28.91
T4S1-k141_507334	Unknown	4257	3.6291	26	36.34	42.71	5	1	0	High-quality	100	HMM-based (lower-bound)	0	1		1	20	367	95.42
T4S1-k141_502835	Circoviridae	2354	3.37181	43	17.78	44.56	4	2	0	High-quality	100	AAI-based (medium-confidence)	0	1		1	25	120	51.6
T4S1-k141_502596	Podoviridae	53656	4.72962	35.7	0.54	45.52	75	33	1	High-quality	100	AAI-based (medium-confidence)	0	1		1	1.33	89	31.77
T4S1-k141_475786	Myoviridae	41490	4.61794	32.4	0.57	37.83	66	25	0	High-quality	92.03	AAI-based (high-confidence)	0	1		1	1.52	69	22.36
T4S1-k141_470236	Podoviridae	42662	4.63004	31.1	0.79	44.78	57	27	0	High-quality	94.61	AAI-based (medium-confidence)	0	1		1	1.75	105	32.66
T4S1-k141_463517	Siphoviridae	60188	4.77951	46.9	0.31	50.34	94	34	0	High-quality	100	AAI-based (high-confidence)	0	1		1	1.06	56	26.26
T4S1-k141_462158	Podoviridae	50498	4.70327	25.5	0.65	43.04	65	32	1	High-quality	100	AAI-based (medium-confidence)	0	1		1	1.54	103	26.27
T4S1-k141_458269	Unknown	24214	4.38407	37.1	1.36	31.41	28	4	1	Complete	100	DTR (high-confidence)	0	1		1	3.57	101	37.47
T4S1-k141_444945	Siphoviridae	39910	4.60108	37.5	0.51	50.57	62	21	1	Complete	100	DTR (medium-confidence)	0	1		1	1.61	63	23.62
T4S1-k141_444645	Unclassified Virus	2919	3.46523	32.1	7.47	44.12	7	0	0	High-quality	100	AAI-based (high-confidence)	0	1	no viral genes detected	1	14.29	58	18.62
T4S1-k141_434817	Podoviridae	59394	4.77374	54.7	0.33	43.54	77	32	0	Complete	100	DTR (high-confidence)	0	1		1	1.3	61	33.37
T4S1-k141_423957	Circoviridae	2131	3.32858	26.1	44.42	46.83	2	1	0	High-quality	93.88	AAI-based (medium-confidence)	0	1		1	50	243	63.42
T4S1-k141_414407	Microviridae	5490	3.73957	30.6	6.98	37.12	8	3	0	High-quality	95.87	AAI-based (medium-confidence)	0	1		1	12.5	116	35.5
T4S1-k141_409650	Unknown	4156	3.61868	27.2	33.72	45.84	5	2	0	Complete	100	DTR (high-confidence)	0	1		1	20	435	118.32
T4S1-k141_408871	Siphoviridae	48674	4.6873	27.5	0.88	42.29	75	28	0	High-quality	100	AAI-based (medium-confidence)	0	1		1	1.33	136	37.4
T4S1-k141_394699	Unknown	3184	3.50297	0	0	45.45	5	1	0	High-quality	97.4	HMM-based (lower-bound)	0	1
T4S1-k141_379843	Podoviridae	78080	4.89254	32.7	0.5	37.64	102	34	0	Complete	100	DTR (high-confidence)	0	1		1	0.98	121	39.57
T4S1-k141_356861	Unclassified Virus	1681	3.22557	37.2	42.19	42.06	3	0	0	High-quality	94.58	AAI-based (medium-confidence)	0	1	no viral genes detected	1	33.33	154	57.29
T4S1-k141_35221	Circoviridae	2214	3.34518	26.1	54	43.86	2	1	0	High-quality	100	AAI-based (medium-confidence)	0	1		1	50	297	77.52
T4S1-k141_344636	Podoviridae	28879	4.46058	60	0.55	35.42	36	9	0	Complete	100	DTR (medium-confidence)	0	1		1	2.78	46	27.6
T4S1-k141_338509	Unclassified Virus	2391	3.37858	40.9	15.28	50.77	2	0	0	High-quality	95.69	AAI-based (medium-confidence)	0	1	no viral genes detected	1	50	59	24.13
T4S1-k141_337298	Podoviridae	30633	4.48619	29.8	1.37	36	38	10	0	Complete	100	DTR (high-confidence)	0	1		1	2.63	122	36.36
T4S1-k141_331007	Siphoviridae	35124	4.5456	50	0.52	55.74	47	19	0	High-quality	97.46	AAI-based (medium-confidence)	0	1		1	2.13	58	29
T4S1-k141_330658	Autographiviridae	40232	4.60457	43.1	0.51	54.38	54	23	0	High-quality	98.94	AAI-based (medium-confidence)	0	1		1	1.85	63	27.15
T4S1-k141_31107	Unclassified Virus	2525	3.40226	23	45.88	52.79	3	0	0	High-quality	100	AAI-based (high-confidence)	0	1	no viral genes detected	1	33.33	301	69.23
T4S1-k141_309507	Microviridae	5747	3.75944	31.4	24.14	41.1	9	5	0	High-quality	95.91	AAI-based (medium-confidence)	0	1		1	11.11	435	136.59
T4S1-k141_300717	Autographiviridae	42464	4.62802	30.5	0.96	56.5	57	27	0	Complete	100	DTR (high-confidence)	0	1		1	1.75	128	39.04
T4S1-k141_292699	Unknown	6407	3.80665	28.1	11.56	54.61	9	2	0	Complete	100	DTR (high-confidence)	0	1		1	11.11	216	60.7
T4S1-k141_285579	Podoviridae	41503	4.61808	25.5	1.04	48.62	61	17	0	Complete	100	DTR (high-confidence)	0	1		1	1.64	135	34.42
T4S1-k141_273317	Myoviridae	47891	4.68025	24.1	0.96	34.39	88	27	0	High-quality	100	AAI-based (medium-confidence)	0	1		1	1.14	144	34.7
T4S1-k141_233713	Unclassified Virus	2336	3.36847	64.9	19.17	48.8	4	0	0	Complete	100	DTR (high-confidence)	0	1.1	no viral genes detected	1	25	125	81.13
T4S1-k141_22425	Microviridae	6659	3.82341	30.4	10.38	43.96	11	2	0	High-quality	100	HMM-based (lower-bound)	0	1		1	9.09	171	51.98
T4S1-k141_223895	Podoviridae	73568	4.86669	33.3	0.28	53.69	107	39	2	Complete	100	DTR (high-confidence)	0	1		1	0.93	64	21.31
T4S1-k141_22355	Siphoviridae	43567	4.63916	39.1	0.63	57.35	76	26	0	Complete	100	DTR (high-confidence)	0	1		1	1.32	87	34.02
T4S1-k141_221807	Unclassified Virus	2389	3.37822	22.8	46.71	48.26	3	1	0	High-quality	100	AAI-based (medium-confidence)	0	1		1	33.33	305	69.54
T4S1-k141_216594	Unknown	8155	3.91142	59.3	6.43	37.51	10	1	0	Complete	100	DTR (high-confidence)	0	1		1	10	141	83.61
T4S1-k141_200810	Podoviridae	71700	4.85552	40.4	0.28	57.09	93	46	0	High-quality	97.07	AAI-based (high-confidence)	0	1		1	1.08	62	25.05
T4S1-k141_199056	Circoviridae	2374	3.37548	23.8	43.79	45.32	3	1	0	High-quality	100	AAI-based (medium-confidence)	0	1.1		1	33.33	296	70.45
T4S1-k141_187001	Myoviridae	37067	4.56899	38.4	0.6	55.33	65	33	0	Complete	100	DTR (medium-confidence)	0	1		1	1.54	69	26.5
T4S1-k141_164538	Unknown	2752	3.43965	31	19.03	45.75	4	1	0	High-quality	100	AAI-based (high-confidence)	0	1		1	25	153	47.43
T4S1-k141_1592	Riboviria	3983	3.60021	29.8	48.81	46.8	3	1	0	High-quality	92.83	HMM-based (lower-bound)	0	1		1	33.33	617	183.87
T4S1-k141_153480	Unclassified Virus	2451	3.38934	51.4	10.7	43.21	4	0	0	Complete	100	DTR (high-confidence)	0	1.1	no viral genes detected	1	25	61	31.35
T4S1-k141_146746	Autographiviridae	43904	4.6425	24.8	0.96	54.25	44	21	0	Complete	100	DTR (high-confidence)	0	1		1	2.27	134	33.23
T4S1-k141_144435	Autographiviridae	45373	4.6568	32	0.7	42.39	53	7	0	Complete	100	DTR (high-confidence)	0	1		1	1.89	101	32.32
T4S1-k141_130001	Unknown	6039	3.78097	0	0	31.3	4	1	0	Complete	100	DTR (high-confidence)	0	1
T4S1-k141_11767	Siphoviridae	45847	4.66131	30.8	0.56	47.5	78	33	1	High-quality	97.73	AAI-based (medium-confidence)	0	1		1	1.28	77	23.72
T4S1-k141_107120	Myoviridae	39649	4.59823	26	1	46.14	53	8	0	Complete	100	DTR (high-confidence)	0	1		1	1.89	125	32.5
T4S1-k141_100501	Siphoviridae	47331	4.67515	30	0.45	44.18	75	30	0	High-quality	99.88	AAI-based (medium-confidence)	0	1		1	1.33	65	19.5
T2S3-k141_7886	Unclassified Virus	2937	3.4679	27.9	30.48	44.67	4	2	0	High-quality	100	HMM-based (lower-bound)	0	1		1	25	235	65.56
T2S3-k141_55333	Unclassified Virus	2363	3.37346	46.2	10.86	42.11	6	0	0	High-quality	100	AAI-based (medium-confidence)	0	1	no viral genes detected	1	16.67	62	28.64
T2S3-k141_52616	Myoviridae	46949	4.67163	33.7	0.66	45.15	73	44	0	High-quality	100	AAI-based (high-confidence)	0	1		1	1.37	93	31.34
T2S3-k141_444638	Unclassified Virus	2558	3.4079	24.4	55.71	47.22	3	1	0	High-quality	100	HMM-based (lower-bound)	0	1.05		1	33.33	234	57.1
T2S3-k141_444438	Circoviridae	1929	3.28533	36.1	25.27	46.45	4	2	0	High-quality	92.14	AAI-based (medium-confidence)	0	1		1	25	117	42.24
T2S3-k141_437463	Siphoviridae	58527	4.76736	36.8	0.46	41.82	77	31	0	High-quality	98.98	AAI-based (medium-confidence)	0	1		1	1.3	84	30.91
T2S3-k141_284114	Siphoviridae	41365	4.61663	47.1	0.46	43.05	62	28	0	High-quality	100	AAI-based (high-confidence)	0	1		1	1.61	56	26.38
T2S3-k141_268962	Podoviridae	37223	4.57081	30.1	0.76	40.4	64	14	1	High-quality	94.06	AAI-based (high-confidence)	0	1		1	1.56	86	25.89
T2S2-k141_74916	Unclassified Virus	2795	3.44638	29.3	29.25	45.94	3	3	0	High-quality	100	HMM-based (lower-bound)	0	1.05		1	33.33	184	53.91
T2S2-k141_65894	Unknown	7394	3.86888	0	0	36.49	10	1	0	High-quality	100	HMM-based (lower-bound)	0	1
T2S2-k141_645564	Unclassified Virus	2684	3.42878	38.2	19.91	49.48	3	3	0	Complete	100	DTR (medium-confidence)	0	1.1		1	33.33	135	51.57
T2S2-k141_595137	Unclassified Virus	2524	3.40209	43.8	10.29	54.24	8	0	0	High-quality	100	AAI-based (high-confidence)	0	1	no viral genes detected	1	12.5	74	32.41
T2S2-k141_459384	Unclassified Virus	2797	3.44669	43.6	37.55	42.26	4	0	0	High-quality	100	AAI-based (medium-confidence)	0	1	no viral genes detected; contig >1.5x longer than expected genome length	1	25	92	40.11
T2S2-k141_370465	Podoviridae	49654	4.69595	34.3	0.46	41.9	57	24	1	Complete	100	DTR (high-confidence)	0	1		1	1.75	72	24.7
T2S2-k141_280585	Unclassified Virus	1885	3.27531	27.7	58.98	49.76	2	1	0	Complete	100	DTR (medium-confidence)	0	1.1		1	50	174	48.2
T2S2-k141_112537	Podoviridae	78357	4.89408	36.5	0.33	35.39	105	37	1	High-quality	100	AAI-based (high-confidence)	0	1		1	0.95	82	29.93
T2S1-k141_940619	Circoviridae	2248	3.3518	24.2	58.44	42.17	2	2	0	Complete	100	DTR (high-confidence)	0	1.1		1	50	329	79.62
T2S1-k141_922532	Unknown	5745	3.75929	29	20.56	42.63	7	4	0	Complete	100	DTR (high-confidence)	0	1		1	14.29	368	106.72
T2S1-k141_919641	Unclassified Virus	1479	3.16997	43	54.3	49.9	3	0	0	Complete	100	DTR (high-confidence)	0	1.1	no viral genes detected	1	33.33	202	86.86
T2S1-k141_916025	Unclassified Virus	2068	3.31555	37.4	47.84	33.51	3	0	0	Complete	100	DTR (high-confidence)	0	1.1	no viral genes detected	1	33.33	277	103.6
T2S1-k141_915092	Unclassified Virus	1985	3.29776	23.4	50.59	42.82	3	2	0	Complete	100	DTR (medium-confidence)	0	1.1		1	33.33	299	69.97
T2S1-k141_915081	Unclassified Virus	1974	3.29535	45.8	52.38	41.44	2	0	0	Complete	100	DTR (high-confidence)	0	1.1	no viral genes detected	1	50	99	45.34
T2S1-k141_912574	Microviridae	4969	3.69627	36.8	5.58	41.92	9	6	0	Complete	100	DTR (high-confidence)	0	1		1	11.11	86	31.65
T2S1-k141_911720	Microviridae	4295	3.63296	40	11.41	37.88	6	5	0	Complete	100	DTR (high-confidence)	0	1		1	16.67	150	60
T2S1-k141_911586	Unknown	4558	3.65877	23.6	25.47	31.31	6	4	0	Complete	100	DTR (high-confidence)	0	1		1	16.67	337	79.53
T2S1-k141_884352	Podoviridae	89743	4.953	29.5	0.33	32.49	96	15	1	High-quality	94.42	AAI-based (medium-confidence)	0	1		1	1.04	93	27.43
T2S1-k141_883752	Unclassified Virus	3760	3.57519	25.4	36.05	43.8	3	2	0	High-quality	100	AAI-based (high-confidence)	0	1		1	33.33	403	102.36
T2S1-k141_870633	Siphoviridae	64518	4.80968	29.3	0.44	37.77	99	48	2	Complete	100	DTR (high-confidence)	0	1		1	1.01	90	26.37
T2S1-k141_81561	Unclassified Virus	2079	3.31785	25.4	53.26	43.15	3	1	0	Complete	100	DTR (high-confidence)	0	1.1		1	33.33	302	76.71
T2S1-k141_811412	Podoviridae	42197	4.62528	36.3	0.61	50.94	55	15	0	Complete	100	DTR (high-confidence)	0	1		1	1.82	81	29.4
T2S1-k141_756666	Unclassified Virus	2632	3.42029	23.8	44.09	52.58	4	2	0	High-quality	100	AAI-based (medium-confidence)	0	1		1	25	328	78.06
T2S1-k141_740913	Unknown	10368	4.01569	0	0	37.26	11	2	0	High-quality	100	HMM-based (lower-bound)	0	1
T2S1-k141_739246	Podoviridae	37127	4.56969	31.5	0.74	39.57	56	18	1	High-quality	93.13	AAI-based (high-confidence)	0	1		1	1.79	85	26.77
T2S1-k141_722532	Riboviria	3624	3.55919	24.4	43.75	37.17	3	1	0	High-quality	99.82	AAI-based (medium-confidence)	0	1		1	33.33	511	124.68
T2S1-k141_719924	Circoviridae	4395	3.64296	26.9	50.6	39.25	3	1	0	High-quality	100	HMM-based (lower-bound)	0	1		1	33.33	549	147.68
T2S1-k141_712556	Siphoviridae	31775	4.50209	25.6	1.2	39.66	52	7	0	High-quality	92.1	AAI-based (medium-confidence)	0	1		1	1.92	118	30.21
T2S1-k141_70704	Unclassified Virus	4260	3.62941	55.8	4.58	44.91	6	3	0	High-quality	100	AAI-based (medium-confidence)	0	1	contig >1.5x longer than expected genome length	1	16.67	54	30.13
T2S1-k141_641604	Unclassified Virus	2855	3.45561	30.5	50.6	51.7	3	0	0	High-quality	100	AAI-based (high-confidence)	0	1	no viral genes detected	1	33.33	297	90.58
T2S1-k141_606681	Podoviridae	39424	4.59576	29.1	0.71	47.48	66	24	0	High-quality	100	AAI-based (medium-confidence)	0	1		1	1.52	88	25.61
T2S1-k141_605616	Siphoviridae	43904	4.6425	37.5	0.52	41.57	85	42	0	High-quality	100	AAI-based (medium-confidence)	0	1		1	1.18	72	27
T2S1-k141_555768	Podoviridae	41276	4.6157	34.6	0.44	33.48	61	10	0	High-quality	100	AAI-based (medium-confidence)	0	1		1	1.64	56	19.38
T2S1-k141_544154	Podoviridae	13561	4.13229	29.8	3.63	35.82	18	6	0	High-quality	100	AAI-based (medium-confidence)	0	1		1	5.56	139	41.42
T2S1-k141_541625	Unclassified Virus	16527	4.21819	32.4	1.37	60.81	24	9	0	High-quality	100	AAI-based (high-confidence)	0	1		1	4.17	70	22.68
T2S1-k141_512749	Podoviridae	27298	4.43613	28.6	1.51	46.81	34	13	0	High-quality	92.62	AAI-based (medium-confidence)	0	1		1	2.94	131	37.47
T2S1-k141_490743	Podoviridae	33130	4.52022	25	1.91	49.26	30	16	0	High-quality	91.72	AAI-based (medium-confidence)	0	1		1	3.33	195	48.75
T2S1-k141_485860	Siphoviridae	40848	4.61117	42.6	0.42	39.14	75	15	0	Complete	100	DTR (high-confidence)	0	1		1	1.33	52	22.15
T2S1-k141_477764	Podoviridae	48207	4.68311	24.4	0.82	44.69	71	34	1	Complete	100	DTR (high-confidence)	0	1		1	1.41	125	30.5
T2S1-k141_429308	Unclassified Virus	2750	3.43933	51.1	5.76	38.84	7	0	0	Complete	100	DTR (high-confidence)	0	1.05	no viral genes detected	1	14.29	49	25.04
T2S1-k141_42883	Podoviridae	70806	4.85007	39.7	0.34	34.46	101	41	0	Complete	100	DTR (high-confidence)	0	1		1	0.99	77	30.57
T2S1-k141_421846	Podoviridae	40355	4.6059	40	0.51	50.33	51	11	0	High-quality	98.43	AAI-based (medium-confidence)	0	1		1	1.96	64	25.6
T2S1-k141_419593	Unclassified Virus	1629	3.21192	32.4	70.47	44.01	3	0	0	High-quality	90.42	AAI-based (high-confidence)	0	1	no viral genes detected	1	33.33	315	102.06
T2S1-k141_395829	Unclassified Virus	2217	3.34577	24.4	49.3	33.47	2	2	0	Complete	100	DTR (high-confidence)	0	1.1		1	50	283	69.05
T2S1-k141_38816	Siphoviridae	34935	4.54326	32.4	0.96	36.43	57	18	1	Complete	100	DTR (medium-confidence)	0	1		1	1.75	107	34.67
T2S1-k141_375303	Podoviridae	36481	4.56207	30.7	1.06	39.76	55	15	0	Complete	100	DTR (high-confidence)	0	1		1	1.82	118	36.23
T2S1-k141_357652	Unclassified Virus	5391	3.73167	27.2	49.4	43.87	2	2	0	High-quality	100	AAI-based (medium-confidence)	0	1	contig >1.5x longer than expected genome length	1	50	372	101.18
T2S1-k141_339854	Parvoviridae	6167	3.79007	29.8	30.45	38.04	3	2	0	High-quality	97.75	HMM-based (lower-bound)	0	1		1	33.33	559	166.58
T2S1-k141_337257	Siphoviridae	45270	4.65581	26.5	0.92	46.82	71	31	0	High-quality	100	AAI-based (high-confidence)	0	1		1	1.41	127	33.66
T2S1-k141_335902	Unclassified Virus	4735	3.67532	39.3	7.29	50.62	12	0	0	Complete	100	DTR (high-confidence)	0	1	no viral genes detected; contig >1.5x longer than expected genome length	1	8.33	93	36.55
T2S1-k141_317237	Unclassified Virus	2658	3.42455	40.2	23.28	48.57	6	0	0	High-quality	100	AAI-based (medium-confidence)	0	1	no viral genes detected	1	16.67	186	74.77
T2S1-k141_315620	Podoviridae	61074	4.78586	40.7	0.34	45.11	85	29	1	High-quality	99.56	AAI-based (medium-confidence)	0	1		1	1.18	65	26.45
T2S1-k141_310976	Siphoviridae	43573	4.63922	31.2	0.77	41.52	54	20	0	High-quality	100	AAI-based (high-confidence)	0	1		1	1.85	106	33.07
T2S1-k141_30289	Unclassified Virus	2386	3.37767	23	48.17	49.96	3	1	0	High-quality	97.24	AAI-based (high-confidence)	0	1		1	33.33	343	78.89
T2S1-k141_259202	Unclassified Virus	2087	3.31952	42.2	17.71	39.87	6	0	0	Complete	100	DTR (high-confidence)	0	1.1	no viral genes detected	1	16.67	102	43.04
T2S1-k141_24597	Siphoviridae	33143	4.52039	27.1	1.08	29.48	49	18	0	High-quality	95.56	AAI-based (medium-confidence)	0	1		1	2.04	111	30.08
T2S1-k141_230282	Unknown	5847	3.76693	24.5	21.21	39.82	7	5	0	Complete	100	DTR (high-confidence)	0	1		1	14.29	365	89.42
T2S1-k141_205904	Siphoviridae	43174	4.63522	33.7	0.8	44.73	54	27	1	High-quality	97.36	AAI-based (high-confidence)	0	1		1	1.85	108	36.4
T2S1-k141_190643	Siphoviridae	57998	4.76341	34.7	0.61	43.51	90	39	0	High-quality	100	AAI-based (medium-confidence)	0	1		1	1.11	106	36.78
T2S1-k141_177470	Siphoviridae	36337	4.56035	34.2	0.65	30.53	65	14	0	Complete	100	DTR (high-confidence)	0	1		1	1.54	76	25.99
T2S1-k141_174854	Unknown	12307	4.09015	21.9	11.48	38.13	23	4	0	Complete	100	DTR (high-confidence)	0	1		1	4.35	421	92.2
T2S1-k141_168116	Unclassified Virus	3218	3.50759	25.1	28.82	52.73	6	0	0	High-quality	100	AAI-based (medium-confidence)	0	1	no viral genes detected	1	16.67	219	54.97
T2S1-k141_165949	Podoviridae	45813	4.66099	36.6	0.56	39.46	78	21	0	High-quality	100	AAI-based (high-confidence)	0	1		1	1.28	75	27.45
T2S1-k141_142222	Unclassified Virus	2151	3.33264	55	44.94	38.91	2	0	0	High-quality	100	AAI-based (medium-confidence)	0	1	no viral genes detected	1	50	40	22
T2S1-k141_123752	Unclassified Virus	2270	3.35603	34	50.11	46.74	2	2	0	High-quality	95.62	HMM-based (lower-bound)	0	1		1	50	235	79.9
T2S1-k141_103815	Circoviridae	4011	3.60325	77.78	18.09	46.22	5	1	0	High-quality	100	AAI-based (medium-confidence)	0	1	contig >1.5x longer than expected genome length	2	40	70	54.45
T2S1-k141_101110	Unclassified Virus	4018	3.60401	31.6	44.4	42.66	6	2	0	Complete	100	ITR (high-confidence)	0	1		2	33.33	460	145.36
SZr1-k141_98411	Riboviria	3654	3.56277	30.4	100	35.22	1	1	0	High-quality	91.48	AAI-based (high-confidence)	0	1		1	100	1114	338.66
SZr1-k141_8026	Unclassified Virus	1958	3.29181	25.5	45.56	32.12	2	2	0	Complete	100	DTR (medium-confidence)	0	1		1	50	231	58.91
SZr1-k141_72709	Riboviria	3792	3.57887	38.2	43.01	37.66	4	2	0	High-quality	100	AAI-based (medium-confidence)	0	1		1	25	517	197.49
SZr1-k141_239517	Unclassified Virus	1615	3.20817	29.2	35.96	44.89	2	2	0	Complete	100	DTR (high-confidence)	0	1.1		1	50	123	35.92
SZr1-k141_239302	Unclassified Virus	1860	3.26951	39.6	48.88	42.04	2	1	0	Complete	100	DTR (high-confidence)	0	1.1		1	50	218	86.33
SZr1-k141_239198	Circoviridae	1843	3.26553	36	45.31	47.31	2	2	0	Complete	100	DTR (high-confidence)	0	1.1		1	50	222	79.92
SZr1-k141_239146	Unclassified Virus	1898	3.2783	38.7	43.93	48.37	3	2	0	Complete	100	DTR (high-confidence)	0	1.1		1	33.33	210	81.27
SZr1-k141_239145	Unclassified Virus	1771	3.24822	26.1	44.16	43.14	3	1	0	Complete	100	DTR (high-confidence)	0	1.1		1	33.33	223	58.2
SZr1-k141_238976	Unclassified Virus	1808	3.2572	39.8	40.32	39.05	3	3	0	Complete	100	DTR (high-confidence)	0	1.1		1	33.33	204	81.19
SZr1-k141_238947	Unclassified Virus	1857	3.26881	32	46.3	44.43	3	1	0	Complete	100	DTR (medium-confidence)	0	1.1		1	33.33	244	78.08
SZr1-k141_238943	Unclassified Virus	1905	3.27989	25	51.69	40.31	3	2	0	Complete	100	DTR (medium-confidence)	0	1.1		1	33.33	306	76.5
SZr1-k141_238901	Unknown	1843	3.26553	0	0	44.22	3	2	0	Complete	100	DTR (medium-confidence)	0	1.1
SZr1-k141_23822	Unclassified Virus	1927	3.28488	26.5	45.83	37.73	2	1	0	High-quality	90.48	HMM-based (lower-bound)	0	1		1	50	220	58.3
SZr1-k141_221050	Riboviria	9362	3.97137	22.1	31.57	44.19	4	3	0	High-quality	100	AAI-based (high-confidence)	0	1		1	25	834	184.31
SZr1-k141_212688	Riboviria	3745	3.57345	43.2	45.28	40.19	3	1	0	High-quality	100	AAI-based (medium-confidence)	0	1		1	33.33	528	228.1
SZr1-k141_211549	Riboviria	9322	3.96951	22.5	31.9	40.42	2	2	0	High-quality	100	AAI-based (medium-confidence)	0	1		1	50	839	188.78
SZr1-k141_184862	Unclassified Virus	1850	3.26717	60.8	39.58	43.41	3	0	0	High-quality	95.92	AAI-based (medium-confidence)	0	1	no viral genes detected	1	33.33	188	114.3
SZr1-k141_117762	Riboviria	6161	3.78965	48.58	100	55.71	2	1	0	High-quality	96.3	AAI-based (high-confidence)	0	1		2	100	1913	929.34
SZd3-k141_64095	Unknown	4404	3.64385	0	0	34.92	6	1	0	High-quality	100	HMM-based (lower-bound)	0	1
SZd3-k141_62882	Unclassified Virus	1751	3.24329	23.4	59.47	41.8	2	1	0	High-quality	98.7	AAI-based (high-confidence)	0	1		1	50	201	47.03
SZd3-k141_4526	Circoviridae	4030	3.60531	27.7	18.93	46.35	4	3	0	High-quality	99.81	HMM-based (lower-bound)	0	1		1	25	138	38.23
SZd3-k141_31180	Circoviridae	1739	3.2403	49.3	100	41.63	1	0	0	High-quality	99.66	AAI-based (medium-confidence)	0	1	no viral genes detected	1	100	73	35.99
SZd3-k141_24355	Unclassified Virus	3556	3.55096	29.6	51.84	40.58	4	1	0	High-quality	100	AAI-based (medium-confidence)	0	1		1	25	296	87.62
SZd2-k141_79669	Circoviridae	2070	3.31597	26.1	54.11	34.93	3	1	0	Complete	100	DTR (high-confidence)	0	1.1		1	33.33	296	77.26
SZd2-k141_74637	Unclassified Virus	2043	3.31027	25.6	44.3	45.67	2	2	0	High-quality	94.7	AAI-based (medium-confidence)	0	1		1	50	233	59.65
SZd2-k141_71336	Unclassified Virus	2018	3.30492	46.5	47.92	39.44	3	0	0	High-quality	100	AAI-based (medium-confidence)	0	1	no viral genes detected	1	33.33	219	101.83
SZd2-k141_53515	Circoviridae	2456	3.39023	28.8	50.11	33.71	2	1	0	High-quality	100	AAI-based (medium-confidence)	0	1		1	50	233	67.1
SZd2-k141_34311	Circoviridae	3148	3.49803	42.6	10.94	43.96	4	2	0	High-quality	100	AAI-based (medium-confidence)	0	1		1	25	63	26.84
SZd2-k141_19952	Unclassified Virus	2165	3.33546	46.6	76.72	42.49	2	0	0	High-quality	100	AAI-based (medium-confidence)	0	1	no viral genes detected	1	50	89	41.47
SZd1-k141_95279	Unclassified Virus	1868	3.27138	32	38.9	39.29	3	0	0	Complete	100	DTR (high-confidence)	0	1.1	no viral genes detected	1	33.33	219	70.08
SZd1-k141_9447	Unclassified Virus	2014	3.30406	24.2	48.92	52.78	2	1	0	Complete	100	DTR (high-confidence)	0	1.1		1	50	250	60.5
SZd1-k141_84418	Unknown	2362	3.37328	0	0	32.35	4	2	0	High-quality	100	HMM-based (lower-bound)	0	1.05
SZd1-k141_83496	Unknown	3147	3.4979	22.1	36.8	51.57	3	2	0	High-quality	100	AAI-based (medium-confidence)	0	1		1	33.33	283	62.54
SZd1-k141_8279	Unclassified Virus	1923	3.28398	31.9	36.38	38.69	4	2	0	Complete	100	DTR (high-confidence)	0	1.1		1	25	223	71.14
SZd1-k141_81086	Unclassified Virus	2050	3.31175	41.3	13.39	40.93	3	3	0	High-quality	100	AAI-based (high-confidence)	0	1		1	33.33	66	27.26
SZd1-k141_80079	Unclassified Virus	1635	3.21352	43.5	49.62	42.45	3	2	0	High-quality	91.7	AAI-based (medium-confidence)	0	1		1	33.33	130	56.55
SZd1-k141_79714	Unclassified Virus	2302	3.36211	22.3	53.19	46.96	3	2	0	High-quality	100	AAI-based (medium-confidence)	0	1.05		1	33.33	275	61.33
SZd1-k141_79239	Siphoviridae	28442	4.45396	60.4	0.5	30.31	54	10	0	Complete	100	ITR (medium-confidence)	0	1		1	1.85	45	27.18
SZd1-k141_78815	Circoviridae	2588	3.41296	23.2	50.09	40.22	2	2	0	High-quality	100	AAI-based (medium-confidence)	0	1		1	50	280	64.96
SZd1-k141_76451	Unclassified Virus	1971	3.29469	35.1	30.65	38.61	3	0	0	High-quality	100	AAI-based (medium-confidence)	0	1.1	no viral genes detected	1	33.33	175	61.42
SZd1-k141_69084	Unclassified Virus	2955	3.47056	37.6	14.67	43.08	6	3	0	High-quality	100	AAI-based (high-confidence)	0	1		1	16.67	125	47
SZd1-k141_67874	Unclassified Virus	2433	3.38614	29.7	53.1	48.71	2	1	0	High-quality	100	HMM-based (lower-bound)	0	1		1	50	308	91.48
SZd1-k141_66942	Unclassified Virus	1943	3.28847	36.5	53.19	38.24	3	1	0	Complete	100	DTR (high-confidence)	0	1.1		1	33.33	300	109.5
SZd1-k141_65780	Circoviridae	2197	3.34183	25.3	46.99	46.24	3	1	0	Complete	100	DTR (high-confidence)	0	1.1		1	33.33	297	75.14
SZd1-k141_64358	Unknown	2100	3.32222	0	0	43.19	2	1	0	Complete	100	DTR (high-confidence)	0	1.1
SZd1-k141_62867	Circoviridae	2077	3.31744	0	0	34.71	3	1	0	High-quality	97.52	HMM-based (lower-bound)	0	1
SZd1-k141_60793	Unclassified Virus	2196	3.34163	24.5	46.35	45.86	4	1	0	Complete	100	DTR (high-confidence)	0	1.1		1	25	311	76.19
SZd1-k141_59311	Unclassified Virus	2400	3.38021	21.9	47.4	36.54	3	2	0	High-quality	98.33	HMM-based (lower-bound)	0	1		1	33.33	301	65.92
SZd1-k141_55460	Circoviridae	2376	3.37585	28.4	18.13	48.74	4	2	0	High-quality	100	AAI-based (medium-confidence)	0	1		1	25	134	38.06
SZd1-k141_4903	Unclassified Virus	1976	3.29579	27.3	51.75	40.84	3	2	0	Complete	100	DTR (high-confidence)	0	1.1		1	33.33	296	80.81
SZd1-k141_47656	Unclassified Virus	2361	3.3731	30.8	37.43	48.88	4	2	0	High-quality	99.46	HMM-based (lower-bound)	0	1		1	25	201	61.91
SZd1-k141_47402	Unclassified Virus	1838	3.26435	32.9	50.82	34.17	2	1	0	High-quality	100	AAI-based (medium-confidence)	0	1		1	50	216	71.06
SZd1-k141_46290	Unclassified Virus	2476	3.39375	23	50.2	39.5	2	2	0	High-quality	100	AAI-based (medium-confidence)	0	1.05		1	50	378	86.94
SZd1-k141_4521	Circoviridae	2586	3.41263	23.4	45.4	47.14	3	1	0	High-quality	100	AAI-based (medium-confidence)	0	1.05		1	33.33	316	73.94
SZd1-k141_38926	Microviridae	5381	3.73086	24.4	16.69	33.95	6	2	0	High-quality	93.84	AAI-based (high-confidence)	0	1		1	16.67	264	64.42
SZd1-k141_36526	Unclassified Virus	2462	3.39129	38.8	32.97	41.31	3	1	0	High-quality	100	HMM-based (lower-bound)	0	1		1	33.33	182	70.62
SZd1-k141_35828	Unclassified Virus	2053	3.31239	26.7	45.14	45.64	2	2	0	High-quality	92.77	AAI-based (medium-confidence)	0	1		1	50	223	59.54
SZd1-k141_353116	Unclassified Virus	2717	3.43409	32.9	32.8	41.55	3	1	0	Complete	100	DTR (medium-confidence)	0	1.05		1	33.33	244	80.28
SZd1-k141_352163	Unclassified Virus	1954	3.29092	31.4	28.26	42.07	3	2	0	Complete	100	DTR (medium-confidence)	0	1.1		1	33.33	115	36.11
SZd1-k141_352152	Unclassified Virus	2026	3.30664	40.2	35.47	46.5	3	2	0	Complete	100	DTR (high-confidence)	0	1.1		1	33.33	183	73.57
SZd1-k141_351502	Unclassified Virus	2334	3.3681	23.7	40.4	47.43	4	1	0	Complete	100	DTR (high-confidence)	0	1.1		1	25	305	72.28
SZd1-k141_350942	Unclassified Virus	2012	3.30363	26.3	42.63	43.94	3	1	0	Complete	100	DTR (high-confidence)	0	1.1		1	33.33	243	63.91
SZd1-k141_350581	Unknown	1738	3.24005	60.4	32	45.86	3	1	0	Complete	100	DTR (high-confidence)	0	1.1		1	33.33	152	91.81
SZd1-k141_350260	Unclassified Virus	2304	3.36248	25.2	50.87	39.89	2	2	0	Complete	100	DTR (high-confidence)	0	1.1		1	50	291	73.33
SZd1-k141_349878	Unclassified Virus	3331	3.52257	33.8	9.99	38.85	7	1	0	Complete	100	DTR (high-confidence)	0	1		1	14.29	102	34.48
SZd1-k141_349867	Unclassified Virus	2284	3.3587	23.2	48.95	34.63	2	2	0	Complete	100	DTR (high-confidence)	0	1.1		1	50	280	64.96
SZd1-k141_349715	Unknown	2537	3.40432	0	0	41.07	4	1	0	Complete	100	DTR (medium-confidence)	0	1.05
SZd1-k141_349699	Unclassified Virus	3060	3.48572	23.4	34.29	40.52	3	1	0	Complete	100	DTR (high-confidence)	0	1		1	33.33	298	69.73
SZd1-k141_349694	Circoviridae	1981	3.29688	30.5	45.6	35.79	3	1	0	Complete	100	DTR (high-confidence)	0	1.1		1	33.33	249	75.94
SZd1-k141_349655	Unclassified Virus	2117	3.32572	27.6	18.77	42.14	4	3	0	Complete	100	DTR (high-confidence)	0	1.1		1	25	144	39.74
SZd1-k141_349523	Unclassified Virus	2352	3.37144	21.3	44.33	43.96	2	2	0	Complete	100	DTR (high-confidence)	0	1.1		1	50	301	64.11
SZd1-k141_349505	Circoviridae	2545	3.40569	32.5	15.77	54.62	5	3	0	Complete	100	DTR (high-confidence)	0	1.1		1	20	123	39.98
SZd1-k141_349457	Unclassified Virus	1999	3.30081	41.1	14.43	47.82	3	3	0	Complete	100	DTR (high-confidence)	0	1.1		1	33.33	88	36.17
SZd1-k141_349347	Unclassified Virus	2316	3.36474	24.8	47.85	44.43	4	1	0	Complete	100	DTR (high-confidence)	0	1.1		1	25	301	74.65
SZd1-k141_349173	Circoviridae	2055	3.31281	24.6	29.58	38.39	3	3	0	Complete	100	DTR (high-confidence)	0	1.1		1	33.33	171	42.07
SZd1-k141_349038	Unclassified Virus	1977	3.29601	23.7	54.61	42.49	2	2	0	Complete	100	DTR (high-confidence)	0	1.1		1	50	302	71.57
SZd1-k141_348980	Unclassified Virus	3704	3.56867	35.6	35.85	50	4	4	0	Complete	100	ITR (high-confidence)	0	1		2	50	342	121.75
SZd1-k141_347811	Circoviridae	1944	3.2887	51.6	48.6	48.15	2	1	0	High-quality	100	AAI-based (medium-confidence)	0	1		1	50	87	44.89
SZd1-k141_347518	Microviridae	4356	3.63909	23	21.25	34.37	6	3	0	Complete	100	DTR (high-confidence)	0	1		1	16.67	273	62.79
SZd1-k141_345227	Unclassified Virus	1754	3.24403	28	63.76	36.6	2	1	0	High-quality	90.06	AAI-based (medium-confidence)	0	1		1	50	322	90.16
SZd1-k141_343131	Unclassified Virus	2294	3.36059	34.8	33.92	49.69	3	1	0	Complete	100	DTR (high-confidence)	0	1.1		1	33.33	192	66.82
SZd1-k141_340529	Unclassified Virus	2148	3.33203	26.9	32.71	47.16	3	1	0	High-quality	96.84	AAI-based (high-confidence)	0	1		1	33.33	209	56.22
SZd1-k141_338824	Circoviridae	3333	3.52284	28.4	39.84	44.76	4	2	0	High-quality	100	AAI-based (medium-confidence)	0	1		1	25	149	42.32
SZd1-k141_335098	Unclassified Virus	2502	3.39829	27.9	47.37	45.52	4	0	0	High-quality	100	AAI-based (medium-confidence)	0	1	no viral genes detected	1	25	279	77.84
SZd1-k141_334496	Circoviridae	2332	3.36773	44.7	14.58	45.88	5	1	0	High-quality	90.42	AAI-based (medium-confidence)	0	1		1	20	112	50.06
SZd1-k141_332409	Unclassified Virus	2199	3.34223	27	39.97	28.88	4	1	0	High-quality	100	AAI-based (medium-confidence)	0	1.1		1	25	243	65.61
SZd1-k141_328319	Unknown	2501	3.39811	24.9	33.33	44.98	3	1	0	Complete	100	DTR (high-confidence)	0	1.1		1	33.33	209	52.04
SZd1-k141_327953	Circoviridae	3843	3.58467	28.4	20.07	46.14	5	2	0	High-quality	99.66	AAI-based (high-confidence)	0	1		1	20	218	61.91
SZd1-k141_327509	Unclassified Virus	1890	3.27646	36.8	31.29	51.38	4	1	0	Complete	100	DTR (high-confidence)	0	1.1		1	25	179	65.87
SZd1-k141_32388	Circoviridae	2024	3.30621	30.2	100	40.71	1	1	0	High-quality	95.28	AAI-based (high-confidence)	0	1		1	100	248	74.9
SZd1-k141_321581	Unclassified Virus	1877	3.27346	35.4	35.66	38.79	3	2	0	Complete	100	DTR (high-confidence)	0	1.1		1	33.33	194	68.68
SZd1-k141_316476	Unclassified Virus	5561	3.74515	32.7	27.54	53.41	5	2	0	High-quality	100	HMM-based (lower-bound)	0	1		1	20	399	130.47
SZd1-k141_307549	Unclassified Virus	2158	3.33405	30.6	39.69	36.7	4	1	0	High-quality	100	AAI-based (medium-confidence)	0	1		1	25	256	78.34
SZd1-k141_306660	Unclassified Virus	1960	3.29226	23.4	56.7	43.16	3	1	0	High-quality	92.03	HMM-based (lower-bound)	0	1		1	33.33	275	64.35
SZd1-k141_303133	Circoviridae	2127	3.32777	0	0	31.59	5	1	0	High-quality	100	HMM-based (lower-bound)	0	1
SZd1-k141_302693	Circoviridae	1832	3.26293	57.5	31.1	42.3	2	0	0	Complete	100	DTR (high-confidence)	0	1.1	no viral genes detected	1	50	51	29.32
SZd1-k141_300658	Microviridae	4291	3.63256	25.8	20.92	39.15	5	3	0	High-quality	97.81	AAI-based (high-confidence)	0	1		1	20	259	66.82
SZd1-k141_300404	Unknown	1833	3.26316	26.4	54.09	45.34	3	1	0	Complete	100	DTR (medium-confidence)	0	1		1	33.33	291	76.82
SZd1-k141_297835	Unclassified Virus	2295	3.36078	34.9	27.15	48.89	5	0	0	Complete	100	DTR (high-confidence)	0	1.1	no viral genes detected	1	20	186	64.91
SZd1-k141_297457	Unclassified Virus	2291	3.36003	24.9	40.54	42.91	2	2	0	High-quality	98.85	AAI-based (medium-confidence)	0	1		1	50	212	52.79
SZd1-k141_295063	Unclassified Virus	2884	3.46	21.9	32.78	42.02	3	1	0	High-quality	100	AAI-based (medium-confidence)	0	1		1	33.33	278	60.88
SZd1-k141_294876	Unknown	4257	3.6291	26.1	18.7	33.71	6	3	0	High-quality	97.36	AAI-based (high-confidence)	0	1		1	16.67	224	58.46
SZd1-k141_29414	Microviridae	4271	3.63053	64.1	3.06	34.84	10	9	0	Complete	100	DTR (high-confidence)	0	1		1	10	40	25.64
SZd1-k141_291375	Circoviridae	2229	3.34811	33.8	19.44	42.31	4	3	0	High-quality	97.13	HMM-based (lower-bound)	0	1		1	25	131	44.28
SZd1-k141_28996	Unclassified Virus	1863	3.27021	38.5	36.76	38.49	3	2	0	High-quality	100	AAI-based (medium-confidence)	0	1.1		1	33.33	186	71.61
SZd1-k141_289081	Unclassified Virus	3610	3.55751	0	0	41.39	5	2	0	High-quality	97.47	HMM-based (lower-bound)	0	1
SZd1-k141_28433	Unknown	1936	3.28691	23.7	50	43.03	3	1	0	High-quality	93.66	HMM-based (lower-bound)	0	1.05		1	33.33	276	65.41
SZd1-k141_283990	Unclassified Virus	4834	3.68431	57.1	32.5	49.05	6	2	0	High-quality	100	AAI-based (medium-confidence)	0	1		1	16.67	417	238.11
SZd1-k141_283919	Unclassified Virus	1817	3.25935	39.1	65.54	32.14	3	0	0	High-quality	100	AAI-based (medium-confidence)	0	1	no viral genes detected	1	33.33	232	90.71
SZd1-k141_282860	Unclassified Virus	4743	3.67605	30.5	10.26	42.38	7	6	0	High-quality	100	AAI-based (high-confidence)	0	1		1	14.29	149	45.45
SZd1-k141_280973	Unclassified Virus	7096	3.85101	24.1	24.58	34.94	8	1	0	High-quality	100	HMM-based (lower-bound)	0	1		1	12.5	451	108.69
SZd1-k141_276963	Unclassified Virus	1754	3.24403	33.7	20.79	48.12	3	0	0	High-quality	100	AAI-based (medium-confidence)	0	1	no viral genes detected	1	33.33	90	30.33
SZd1-k141_269866	Circoviridae	4741	3.67587	31.1	16.67	50.6	7	2	0	High-quality	100	HMM-based (lower-bound)	0	1		1	14.29	127	39.5
SZd1-k141_26868	Unclassified Virus	2019	3.30514	31	35.15	37	2	1	0	High-quality	94.8	HMM-based (lower-bound)	0	1		1	50	142	44.02
SZd1-k141_267038	Circoviridae	4705	3.67256	27.6	18.94	46.67	6	2	0	High-quality	100	AAI-based (high-confidence)	0	1	contig >1.5x longer than expected genome length	1	16.67	274	75.62
SZd1-k141_265325	Unclassified Virus	3312	3.52009	30.4	12.21	33.42	6	1	0	Complete	100	DTR (high-confidence)	0	1		1	16.67	131	39.82
SZd1-k141_259822	Circoviridae	2467	3.39217	23	39.63	48.97	4	1	0	Complete	100	DTR (high-confidence)	0	1.1		1	25	304	69.92
SZd1-k141_259520	Circoviridae	2171	3.33666	50.7	47.71	37.31	3	1	0	High-quality	100	AAI-based (medium-confidence)	0	1		1	33.33	260	131.82
SZd1-k141_256661	Circoviridae	2111	3.32449	32	26.62	42.87	4	3	0	High-quality	100	AAI-based (high-confidence)	0	1		1	25	156	49.92
SZd1-k141_255056	Unclassified Virus	1843	3.26553	35.4	37.85	29.08	3	2	0	Complete	100	DTR (high-confidence)	0	1.1		1	33.33	187	66.2
SZd1-k141_252209	Unclassified Virus	1906	3.28012	39.8	16.3	33.26	3	3	0	Complete	100	DTR (high-confidence)	0	1.1		1	33.33	88	35.02
SZd1-k141_251703	Unclassified Virus	2567	3.40943	33.2	42.06	43.86	3	2	0	High-quality	100	HMM-based (lower-bound)	0	1		1	33.33	249	82.67
SZd1-k141_248107	Microviridae	4868	3.68735	32.5	6.06	43.53	8	5	0	High-quality	100	AAI-based (high-confidence)	0	1		1	12.5	93	30.23
SZd1-k141_24801	Circoviridae	1855	3.26834	31.7	62.05	30.94	2	1	0	High-quality	100	AAI-based (medium-confidence)	0	1		1	50	242	76.71
SZd1-k141_24724	Microviridae	4856	3.68628	28.9	6.12	45.33	8	6	0	Complete	100	DTR (high-confidence)	0	1		1	12.5	88	25.43
SZd1-k141_246792	Unclassified Virus	1927	3.28488	24.2	48.29	46.45	3	2	0	Complete	100	DTR (medium-confidence)	0	1.1		1	33.33	269	65.1
SZd1-k141_246575	Unclassified Virus	1921	3.28353	24.1	47.61	49.61	3	3	0	Complete	100	DTR (medium-confidence)	0	1.1		1	33.33	269	64.83
SZd1-k141_245279	Unknown	1915	3.28217	0	0	41.31	3	1	0	Complete	100	DTR (medium-confidence)	0	1.1
SZd1-k141_245018	Unknown	2206	3.34361	26.8	40.79	42.2	3	2	0	High-quality	100	AAI-based (high-confidence)	0	1		1	33.33	226	60.57
SZd1-k141_244902	Unclassified Virus	2142	3.33082	27.7	24.42	56.16	3	2	0	High-quality	100	AAI-based (medium-confidence)	0	1		1	33.33	137	37.95
SZd1-k141_243686	Microviridae	4827	3.68368	33.1	10.39	44.4	7	5	0	High-quality	100	AAI-based (high-confidence)	0	1		1	14.29	148	48.99
SZd1-k141_243421	Unclassified Virus	2089	3.31994	63	36.8	40.07	3	0	0	Complete	100	DTR (high-confidence)	0	1.1	no viral genes detected	1	33.33	216	136.08
SZd1-k141_243127	Unclassified Virus	2856	3.45576	23.3	53.14	42.54	5	1	0	High-quality	100	AAI-based (medium-confidence)	0	1		1	20	389	90.64
SZd1-k141_24205	Circoviridae	1947	3.28937	22.7	52.09	49.36	2	1	0	High-quality	96.54	AAI-based (high-confidence)	0	1		1	50	299	67.87
SZd1-k141_238256	Circoviridae	2539	3.40466	25.6	54.39	47.11	4	1	0	High-quality	91.2	AAI-based (high-confidence)	0	1		1	25	310	79.36
SZd1-k141_237148	Unclassified Virus	2957	3.47085	25.5	30.31	43.76	4	1	0	Complete	100	DTR (high-confidence)	0	1		1	25	294	74.97
SZd1-k141_236511	Unclassified Virus	1854	3.26811	36.7	43.75	36.57	2	1	0	High-quality	100	AAI-based (medium-confidence)	0	1		1	50	84	30.83
SZd1-k141_235985	Unclassified Virus	1889	3.27623	29.2	49.63	34.04	3	1	0	Complete	100	DTR (high-confidence)	0	1.1		1	33.33	266	77.67
SZd1-k141_235453	Unclassified Virus	1991	3.29907	34.7	15.42	43.55	3	3	0	Complete	100	DTR (medium-confidence)	0	1.1		1	33.33	93	32.27
SZd1-k141_233338	Unknown	2507	3.39915	27	41.63	44.4	2	1	0	High-quality	98.6	AAI-based (medium-confidence)	0	1		1	50	286	77.22
SZd1-k141_231554	Microviridae	4450	3.64836	36.1	7.75	41.15	7	5	0	High-quality	99.92	AAI-based (high-confidence)	0	1		1	14.29	100	36.1
SZd1-k141_230987	Unclassified Virus	1874	3.27277	26.5	53.91	39.38	2	1	0	Complete	100	DTR (high-confidence)	0	1.1		1	50	262	69.43
SZd1-k141_228195	Unclassified Virus	4678	3.67006	25.4	22.18	42.01	4	1	0	High-quality	100	HMM-based (lower-bound)	0	1		1	25	228	57.91
SZd1-k141_216023	Unclassified Virus	3193	3.5042	25.1	42.66	38.77	2	2	0	Complete	100	DTR (high-confidence)	0	1		1	50	346	86.85
SZd1-k141_214556	Unclassified Virus	4845	3.68529	29.2	19.19	33.17	7	2	0	High-quality	100	HMM-based (lower-bound)	0	1		1	14.29	245	71.54
SZd1-k141_214278	Circoviridae	2085	3.31911	30	65.34	46.09	3	0	0	High-quality	100	AAI-based (medium-confidence)	0	1	no viral genes detected	1	33.33	279	83.7
SZd1-k141_211558	Unclassified Virus	1844	3.26576	27.1	48.89	35.68	2	1	0	High-quality	100	AAI-based (medium-confidence)	0	1.1		1	50	221	59.89
SZd1-k141_211201	Unclassified Virus	2847	3.45439	25.3	32.01	46.26	3	2	0	High-quality	100	AAI-based (medium-confidence)	0	1		1	33.33	267	67.55
SZd1-k141_208376	Unknown	2015	3.30428	31.3	45.03	48.98	3	1	0	Complete	100	DTR (high-confidence)	0	1.1		1	33.33	258	80.75
SZd1-k141_207664	Unclassified Virus	4354	3.63889	43.8	7.4	42.67	6	1	0	Complete	100	DTR (high-confidence)	0	1		1	16.67	94	41.17
SZd1-k141_207310	Unclassified Virus	2231	3.3485	30.9	35.7	38.73	3	0	0	High-quality	100	AAI-based (medium-confidence)	0	1	no viral genes detected	1	33.33	186	57.47
SZd1-k141_206779	Unclassified Virus	3267	3.51415	24.2	30.95	44.63	3	1	0	High-quality	100	AAI-based (medium-confidence)	0	1		1	33.33	282	68.24
SZd1-k141_206073	Unclassified Virus	2226	3.34753	24.9	49.61	39.94	4	2	0	High-quality	96.96	AAI-based (high-confidence)	0	1		1	25	321	79.93
SZd1-k141_204557	Unclassified Virus	2020	3.30535	25.2	37.97	43.71	2	2	0	High-quality	96.89	AAI-based (medium-confidence)	0	1		1	50	240	60.48
SZd1-k141_203202	Unclassified Virus	1822	3.26055	23.9	72	29.58	2	1	0	High-quality	100	AAI-based (high-confidence)	0	1		1	50	306	73.13
SZd1-k141_202188	Unclassified Virus	2883	3.45984	31.7	31.6	46.17	4	2	0	High-quality	90.01	HMM-based (lower-bound)	0	1		1	25	219	69.42
SZd1-k141_199254	Unclassified Virus	3559	3.55133	34.5	10.7	46.25	7	3	0	High-quality	99.25	HMM-based (lower-bound)	0	1		1	14.29	104	35.88
SZd1-k141_198203	Unclassified Virus	2783	3.44451	25.9	39.56	48.94	5	2	0	High-quality	100	AAI-based (medium-confidence)	0	1		1	20	303	78.48
SZd1-k141_189542	Unclassified Virus	1916	3.2824	40.9	41.12	33.25	3	0	0	High-quality	90.55	AAI-based (medium-confidence)	0	1	no viral genes detected	1	33.33	176	71.98
SZd1-k141_186076	Circoviridae	3283	3.51627	23.7	31.56	48.34	4	1	0	High-quality	100	AAI-based (medium-confidence)	0	1		1	25	278	65.89
SZd1-k141_183509	Unclassified Virus	2378	3.37621	36.8	30.81	34.1	4	1	0	High-quality	100	HMM-based (lower-bound)	0	1		1	25	220	80.96
SZd1-k141_183395	Unclassified Virus	1897	3.27807	26.1	50.96	28.04	2	1	0	High-quality	91.78	HMM-based (lower-bound)	0	1		1	50	239	62.38
SZd1-k141_182645	Unclassified Virus	2058	3.31345	27.7	32.54	52.24	3	1	0	Complete	100	DTR (high-confidence)	0	1		1	33.33	191	52.91
SZd1-k141_179428	Unclassified Virus	2382	3.37694	24.7	54.34	45.17	3	1	0	Complete	100	DTR (high-confidence)	0	1.1		1	33.33	307	75.83
SZd1-k141_179032	Siphoviridae	6107	3.78583	27.5	10.7	34.65	14	3	0	High-quality	100	AAI-based (medium-confidence)	0	1		1	7.14	204	56.1
SZd1-k141_173317	Unclassified Virus	2317	3.36493	25.2	47.08	45.79	3	1	0	Complete	100	DTR (high-confidence)	0	1.05		1	33.33	306	77.11
SZd1-k141_172825	Circoviridae	1804	3.25624	57.9	37.22	43.35	3	0	0	High-quality	100	AAI-based (medium-confidence)	0	1	no viral genes detected	1	33.33	147	85.11
SZd1-k141_170792	Circoviridae	1786	3.25188	42	100	41.94	2	2	0	High-quality	95.1	AAI-based (medium-confidence)	0	1		2	100	262	110.04
SZd1-k141_168215	Unclassified Virus	1940	3.2878	40.7	34.1	35.41	3	2	0	Complete	100	DTR (high-confidence)	0	1.1		1	33.33	177	72.04
SZd1-k141_159343	Unclassified Virus	4150	3.61805	23.8	33.58	49.16	4	1	0	High-quality	99.73	HMM-based (lower-bound)	0	1		1	25	409	97.34
SZd1-k141_159306	Circoviridae	2346	3.37033	26.9	48.58	35.98	2	1	0	High-quality	100	AAI-based (high-confidence)	0	1		1	50	222	59.72
SZd1-k141_156878	Circoviridae	2279	3.35774	24.8	31.04	39.89	3	1	0	High-quality	100	AAI-based (high-confidence)	0	1		1	33.33	194	48.11
SZd1-k141_15373	Unclassified Virus	3267	3.51415	24.9	44.98	42.09	2	1	0	High-quality	100	AAI-based (medium-confidence)	0	1		1	50	354	88.15
SZd1-k141_152413	Unclassified Virus	3106	3.4922	27.2	18.76	47.42	4	2	0	High-quality	100	AAI-based (high-confidence)	0	1		1	25	169	45.97
SZd1-k141_151775	Unclassified Virus	2144	3.33122	22.7	47.73	30.36	3	1	0	Complete	100	DTR (high-confidence)	0	1.1		1	33.33	294	66.74
SZd1-k141_149116	Unclassified Virus	2407	3.38148	25	45.76	38.22	3	2	0	Complete	100	DTR (high-confidence)	0	1.1		1	33.33	232	58
SZd1-k141_147918	Unclassified Virus	2056	3.31302	27.2	46.85	30.11	2	1	0	High-quality	100	AAI-based (high-confidence)	0	1		1	50	171	46.51
SZd1-k141_145603	Unclassified Virus	1869	3.27161	40	49.42	50.78	2	1	0	High-quality	100	AAI-based (medium-confidence)	0	1		1	50	214	85.6
SZd1-k141_138753	Unclassified Virus	2728	3.43584	22.7	37.43	36.44	5	1	0	High-quality	94.93	AAI-based (medium-confidence)	0	1		1	20	286	64.92
SZd1-k141_135167	Unclassified Virus	4119	3.61479	23.7	37.24	52.49	3	2	0	High-quality	100	AAI-based (medium-confidence)	0	1		1	33.33	359	85.08
SZd1-k141_13435	Unknown	1982	3.2971	0	0	36.53	3	1	0	High-quality	95.89	HMM-based (lower-bound)	0	1
SZd1-k141_133110	Circoviridae	3685	3.56644	23.1	28.14	45.59	5	1	0	High-quality	100	AAI-based (medium-confidence)	0	1	contig >1.5x longer than expected genome length	1	20	300	69.3
SZd1-k141_132741	Unclassified Virus	3198	3.50488	23.9	31.29	40.65	5	1	0	High-quality	99.02	AAI-based (medium-confidence)	0	1		1	20	312	74.57
SZd1-k141_126565	Unclassified Virus	3224	3.5084	32.3	16.45	47.98	4	3	0	High-quality	100	AAI-based (medium-confidence)	0	1		1	25	164	52.97
SZd1-k141_12589	Unclassified Virus	4776	3.67906	27.5	34.33	29.84	6	1	0	High-quality	100	HMM-based (lower-bound)	0	1		1	16.67	448	123.2
SZd1-k141_125129	Unclassified Virus	2751	3.43949	27.7	75.04	39.33	3	0	0	High-quality	94	AAI-based (medium-confidence)	0	1	no viral genes detected	1	33.33	475	131.57
SZd1-k141_123211	Unclassified Virus	1848	3.2667	23.1	51.49	39.18	2	1	0	Complete	100	DTR (high-confidence)	0	1		1	50	259	59.83
SZd1-k141_12229	Unclassified Virus	1785	3.25164	28.1	31.39	48.24	3	2	0	Complete	100	DTR (high-confidence)	0	1.1		1	33.33	172	48.33
SZd1-k141_11955	Unclassified Virus	1868	3.27138	45.3	41.11	41.86	2	1	0	High-quality	97.05	AAI-based (medium-confidence)	0	1.05		1	50	192	86.98
SZd1-k141_119494	Circoviridae	3003	3.47756	24.6	35.7	43.82	2	1	0	Complete	100	DTR (high-confidence)	0	1		1	50	267	65.68
SZd1-k141_118839	Unclassified Virus	1875	3.273	26	52.87	50.67	2	1	0	Complete	100	DTR (high-confidence)	0	1.1		1	50	221	57.46
SZd1-k141_118505	Unclassified Virus	2522	3.40175	32.4	54.36	48.26	4	1	0	High-quality	100	AAI-based (medium-confidence)	0	1		1	25	324	104.98
SZd1-k141_116281	Unclassified Virus	3091	3.4901	26.7	40.8	37.3	4	2	0	High-quality	98.68	HMM-based (lower-bound)	0	1		1	25	355	94.78
SZd1-k141_116041	Microviridae	7081	3.85009	26.4	12.88	41.05	8	3	0	High-quality	100	AAI-based (medium-confidence)	0	1	contig >1.5x longer than expected genome length	1	12.5	259	68.38
SZd1-k141_113626	Unclassified Virus	2222	3.34674	39.2	15.9	39.02	3	3	0	High-quality	100	AAI-based (medium-confidence)	0	1		1	33.33	86	33.71
SZd1-k141_111536	Unknown	4141	3.61711	34.2	12.43	48.64	6	5	0	High-quality	91.88	AAI-based (high-confidence)	0	1		1	16.67	148	50.62
SZd1-k141_108423	Unclassified Virus	2877	3.45894	25.3	38.48	52.55	3	1	0	Complete	100	DTR (high-confidence)	0	1		1	33.33	294	74.38
SZd1-k141_108109	Unclassified Virus	2340	3.36922	23.9	49.22	41.54	4	1	0	High-quality	100	AAI-based (medium-confidence)	0	1		1	25	316	75.52
SZd1-k141_107447	Circoviridae	1947	3.28937	42.7	22.1	37.08	3	2	0	Complete	100	DTR (high-confidence)	0	1.1		1	33.33	118	50.39
SZd1-k141_100265	Unclassified Virus	2787	3.44514	40.4	14.56	45.6	3	2	0	High-quality	95.19	AAI-based (medium-confidence)	0	1		1	33.33	98	39.59
QZr3-k141_37148	Unclassified Virus	1786	3.25188	24.6	46.5	43.17	3	1	0	Complete	100	DTR (medium-confidence)	0	1.1		1	33.33	246	60.52
QZr3-k141_30874	Unclassified Virus	3211	3.50664	0	0	41.42	7	2	0	Complete	100	DTR (high-confidence)	0	1
QZr2-k141_47280	Unclassified Virus	1940	3.2878	28	40.41	45.36	3	1	0	Complete	100	DTR (high-confidence)	0	1.1		1	33.33	234	65.52
QZr2-k141_37927	Unclassified Virus	3189	3.50365	23.1	50.79	49.39	4	2	0	High-quality	98.58	HMM-based (lower-bound)	0	1		1	25	321	74.15
QZr2-k141_37326	Unclassified Virus	2340	3.36922	42.9	32.86	41.75	5	1	0	High-quality	100	AAI-based (medium-confidence)	0	1.05		1	20	208	89.23
QZr2-k141_34849	Unclassified Virus	1766	3.24699	39	47.83	44.28	2	2	0	Complete	100	DTR (high-confidence)	0	1.1		1	50	220	85.8
QZr2-k141_34652	Unclassified Virus	1835	3.26364	43.2	32.65	45.29	3	1	0	Complete	100	DTR (high-confidence)	0	1.1		1	33.33	160	69.12
QZr2-k141_24342	Circoviridae	2590	3.4133	0	0	42.97	5	2	0	High-quality	100	HMM-based (lower-bound)	0	1
QZr2-k141_23464	Parvoviridae	5757	3.7602	31.5	18.49	36.1	5	3	0	High-quality	95.62	HMM-based (lower-bound)	0	1		1	20	311	97.97
QZr2-k141_1905	Unclassified Virus	2058	3.31345	24.5	44.24	47.52	3	2	0	High-quality	93.96	AAI-based (medium-confidence)	0	1		1	33.33	238	58.31
QZr2-k141_1205	Unclassified Virus	1983	3.29732	48.9	49.81	46.95	3	2	0	Complete	100	DTR (high-confidence)	0	1.1		1	33.33	261	127.63
QZr1-k141_95050	Unclassified Virus	2635	3.42078	33.65	61.74	49.07	4	1	0	High-quality	100	HMM-based (lower-bound)	0	1		2	50	405	136.28
QZr1-k141_223445	Unclassified Virus	1836	3.26387	49	39.46	48.47	4	0	0	Complete	100	DTR (high-confidence)	0	1.1	no viral genes detected	1	25	247	121.03
QZr1-k141_223416	Unclassified Virus	2729	3.436	22.5	56.35	49.76	4	2	0	Complete	100	DTR (high-confidence)	0	1.05		1	25	417	93.83
QZr1-k141_223142	Unclassified Virus	1809	3.25744	0	0	35.49	3	1	0	Complete	100	DTR (medium-confidence)	0	1.1
QZr1-k141_223018	Unclassified Virus	1816	3.25912	27.9	52.51	54.74	3	1	0	Complete	100	DTR (high-confidence)	0	1.1		1	33.33	230	64.17
QZr1-k141_19370	Unclassified Virus	1945	3.28892	24.9	45.08	29.97	2	2	0	Complete	100	DTR (medium-confidence)	0	1.1		1	50	229	57.02
QZr1-k141_175302	Unclassified Virus	1963	3.29292	28	51.82	44.57	3	1	0	High-quality	100	AAI-based (high-confidence)	0	1		1	33.33	285	79.8
QZr1-k141_171333	Unclassified Virus	1924	3.28421	38.1	40.7	45.89	3	2	0	Complete	100	DTR (high-confidence)	0	1.1		1	33.33	199	75.82
QZr1-k141_135534	Riboviria	2951	3.46997	0	0	40.53	5	1	0	High-quality	100	HMM-based (lower-bound)	0	1
QZr1-k141_121636	Circoviridae	1929	3.28533	50	37.67	42.98	3	0	0	Complete	100	DTR (high-confidence)	0	1.1	no viral genes detected	1	33.33	55	27.5
QZr1-k141_115609	Unclassified Virus	1700	3.23045	34.1	48.42	53.18	2	1	0	Complete	100	DTR (high-confidence)	0	1.1		1	50	215	73.31
QZr1-k141_112002	Unknown	2659	3.42472	0	0	32.31	4	1	0	High-quality	100	HMM-based (lower-bound)	0	1
QZd2-k141_2874	Unclassified Virus	2802	3.44747	26.8	34.36	40.4	3	1	0	High-quality	100	AAI-based (medium-confidence)	0	1		1	33.33	267	71.56
QZd1-k141_7144	Circoviridae	2083	3.31869	28.8	29.69	51.32	2	2	0	High-quality	96.91	HMM-based (lower-bound)	0	1		1	50	136	39.17
QZd1-k141_50922	Circoviridae	2295	3.36078	31.1	22.59	46.54	3	2	0	Complete	100	DTR (high-confidence)	0	1.1		1	33.33	155	48.2
QZd1-k141_50847	Cruciviridae	3351	3.52517	29.3	48.67	43	3	1	0	Complete	100	DTR (high-confidence)	0	1		1	33.33	401	117.49
QZd1-k141_50795	Unclassified Virus	2003	3.30168	26	28.08	51.02	3	2	0	Complete	100	DTR (medium-confidence)	0	1.1		1	33.33	178	46.28
QZd1-k141_50774	Circoviridae	2394	3.37912	28.9	18.29	42.65	5	2	0	Complete	100	DTR (high-confidence)	0	1.1		1	20	141	40.75
QZd1-k141_37090	Circoviridae	2119	3.32613	34.5	19.43	44.88	3	2	0	High-quality	96.13	AAI-based (medium-confidence)	0	1		1	33.33	122	42.09
QZd1-k141_35969	Unclassified Virus	3433	3.53567	25	39.73	45.91	3	3	0	High-quality	100	HMM-based (lower-bound)	0	1		1	33.33	232	58
QZd1-k141_27586	Unclassified Virus	1655	3.2188	26.8	75	41.93	3	1	0	High-quality	90.81	AAI-based (high-confidence)	0	1		1	33.33	234	62.71
QZd1-k141_24375	Unclassified Virus	3297	3.51812	22	35.75	32.36	4	1	0	High-quality	100	AAI-based (medium-confidence)	0	1		1	25	301	66.22
QZd1-k141_23939	Unclassified Virus	1786	3.25188	28.7	47.28	39.14	2	1	0	High-quality	100	AAI-based (medium-confidence)	0	1.05		1	50	217	62.28
QZd1-k141_22764	Unclassified Virus	3737	3.57252	27.8	19.01	45.33	5	4	0	High-quality	100	AAI-based (medium-confidence)	0	1	contig >1.5x longer than expected genome length	1	20	193	53.65
QZd1-k141_2132	Circoviridae	1942	3.28825	25.3	41.35	50.77	4	1	0	Complete	100	DTR (medium-confidence)	0	1.1		1	25	215	54.4
QZd1-k141_20123	Unclassified Virus	3523	3.54691	24.6	28.37	46.58	3	1	0	High-quality	100	AAI-based (medium-confidence)	0	1		1	33.33	280	68.88
QZd1-k141_12980	Unknown	5091	3.7068	0	0	33.1	4	1	0	High-quality	100	HMM-based (lower-bound)	0	1
os1-k141_8706	Unclassified Virus	2134	3.32919	45.9	27.8	49.2	4	0	0	High-quality	96.56	AAI-based (medium-confidence)	0	1	no viral genes detected	1	25	179	82.16
os1-k141_851	Unclassified Virus	2073	3.3166	31.3	18.59	38.69	5	0	0	High-quality	100	AAI-based (medium-confidence)	0	1	no viral genes detected	1	20	79	24.73
os1-k141_666	Unclassified Virus	1799	3.25503	45.7	21.43	42.02	3	0	0	Complete	100	DTR (high-confidence)	0	1	no viral genes detected	1	33.33	99	45.24
os1-k141_5126	Unclassified Virus	2622	3.41863	31	21.95	42.98	7	0	0	High-quality	100	AAI-based (medium-confidence)	0	1	no viral genes detected	1	14.29	171	53.01
os1-k141_4948	Unclassified Virus	2271	3.35622	46.3	28.5	44.74	4	0	0	Complete	100	DTR (high-confidence)	0	1.1	no viral genes detected	1	25	179	82.88
os1-k141_4927	Unclassified Virus	2156	3.33365	43.4	18.58	48.01	5	0	0	High-quality	97.58	AAI-based (medium-confidence)	0	1	no viral genes detected	1	20	120	52.08
os1-k141_4514	Unclassified Virus	2966	3.47217	37.6	20.25	46.8	6	0	0	High-quality	100	AAI-based (high-confidence)	0	1	no viral genes detected	1	16.67	179	67.3
os1-k141_40538	Unclassified Virus	1939	3.28758	29	40.91	43.27	3	0	0	Complete	100	DTR (high-confidence)	0	1.1	no viral genes detected	1	33.33	171	49.59
os1-k141_40528	Unclassified Virus	2511	3.39985	43.5	10.77	53.09	7	0	0	Complete	100	DTR (high-confidence)	0	1.1	no viral genes detected	1	14.29	73	31.75
os1-k141_40483	Unclassified Virus	2240	3.35025	63.6	18.55	50.76	4	0	0	Complete	100	DTR (high-confidence)	0	1.1	no viral genes detected	1	25	115	73.14
os1-k141_40473	Unclassified Virus	1987	3.2982	41.7	21.44	50.88	4	1	0	Complete	100	DTR (high-confidence)	0	1.1		1	25	98	40.87
os1-k141_40470	Unclassified Virus	2076	3.31723	42.7	21.4	52.41	4	1	0	Complete	100	DTR (high-confidence)	0	1.1		1	25	104	44.41
os1-k141_40461	Myoviridae	15496	4.19022	42.2	1.77	39.82	27	1	1	Complete	100	DTR (high-confidence)	0	1		1	3.7	83	35.03
os1-k141_40460	Unclassified Virus	2352	3.37144	63.3	17.19	46.77	5	0	0	Complete	100	DTR (high-confidence)	0	1.1	no viral genes detected	1	20	120	75.96
os1-k141_40459	Unknown	6866	3.8367	29.7	5.89	43.21	4	2	1	Complete	100	DTR (high-confidence)	0	1		1	25	115	34.16
os1-k141_40456	Unclassified Virus	1807	3.25696	41.9	34.92	43	4	0	0	Complete	100	DTR (high-confidence)	0	1.1	no viral genes detected	1	25	169	70.81
os1-k141_40449	Unclassified Virus	1838	3.26435	45.6	15.08	46.3	5	0	0	Complete	100	DTR (high-confidence)	0	1.1	no viral genes detected	1	20	84	38.3
os1-k141_40446	Unclassified Virus	1856	3.26858	53.5	7.99	47.74	5	0	0	Complete	100	DTR (high-confidence)	0	1.1	no viral genes detected	1	20	43	23
os1-k141_40445	Unclassified Virus	2328	3.36698	40	12.41	40.42	8	0	0	Complete	100	DTR (high-confidence)	0	1.1	no viral genes detected	1	12.5	87	34.8
os1-k141_40437	Unclassified Virus	2297	3.36116	47.2	25.76	50.94	5	0	0	Complete	100	DTR (high-confidence)	0	1.1	no viral genes detected	1	20	177	83.54
os1-k141_40436	Siphoviridae	35198	4.54652	46.3	0.51	44.62	52	21	1	Complete	100	DTR (medium-confidence)	0	1		1	1.92	58	26.85
os1-k141_40435	Unclassified Virus	2075	3.31702	30.8	30.97	44.24	4	1	0	Complete	100	DTR (high-confidence)	0	1.1		1	25	170	52.36
os1-k141_39311	Unclassified Virus	3615	3.55811	32.5	7.99	44.26	8	1	0	High-quality	99.56	AAI-based (high-confidence)	0	1		1	12.5	92	29.9
os1-k141_38205	Unclassified Virus	2215	3.34537	33.7	28.22	46.05	5	0	0	High-quality	100	AAI-based (medium-confidence)	0	1	no viral genes detected	1	20	184	62.01
os1-k141_36501	Unclassified Virus	2372	3.37511	44.9	18.98	49.49	5	0	0	High-quality	100	AAI-based (medium-confidence)	0	1	no viral genes detected	1	20	138	61.96
os1-k141_35594	Unknown	5379	3.7307	23	88.38	41.09	2	1	0	High-quality	100	AAI-based (high-confidence)	0	1		1	50	1392	320.16
os1-k141_35467	Unclassified Virus	2075	3.31702	52.1	17.57	42.8	5	0	0	Complete	100	DTR (high-confidence)	0	1.1	no viral genes detected	1	20	84	43.76
os1-k141_32672	Unclassified Virus	2357	3.37236	48.4	17.83	46.54	5	0	0	Complete	100	DTR (high-confidence)	0	1.1	no viral genes detected	1	20	125	60.5
os1-k141_32421	Unclassified Virus	2299	3.36154	37	26.41	35.54	5	0	0	Complete	100	DTR (high-confidence)	0	1.1	no viral genes detected	1	20	178	65.86
os1-k141_32002	Unclassified Virus	2014	3.30406	54	38.26	56.55	5	0	0	Complete	100	DTR (high-confidence)	0	1.1	no viral genes detected	1	20	176	95.04
os1-k141_31563	Unknown	1946	3.28914	29.4	37.25	47.74	4	1	0	High-quality	100	AAI-based (medium-confidence)	0	1		1	25	171	50.27
os1-k141_30681	Unclassified Virus	2061	3.31408	32.2	16.45	42.94	7	0	0	Complete	100	DTR (high-confidence)	0	1.1	no viral genes detected	1	14.29	99	31.88
os1-k141_30510	Unknown	4437	3.64709	40.2	27.21	35.29	3	1	0	High-quality	94.78	AAI-based (medium-confidence)	0	1		1	33.33	336	135.07
os1-k141_29985	Unclassified Virus	1960	3.29226	44.6	29.34	40.87	6	1	0	Complete	100	DTR (high-confidence)	0	1.1		1	16.67	169	75.37
os1-k141_28804	Unknown	7464	3.87297	0	0	38.38	9	1	0	Complete	100	DTR (high-confidence)	0	1
os1-k141_27606	Myoviridae	50103	4.69986	45.7	0.31	52.38	69	38	1	High-quality	100	AAI-based (medium-confidence)	0	1		1	1.45	48	21.94
os1-k141_2694	Unknown	5808	3.76403	44.4	29.63	43.23	5	1	0	High-quality	96.74	AAI-based (medium-confidence)	0	1		1	20	411	182.48
os1-k141_25925	Unclassified Virus	4509	3.65408	44	11.9	35.8	10	0	0	High-quality	98.27	AAI-based (high-confidence)	0	1	no viral genes detected	1	10	144	63.36
os1-k141_25367	Unclassified Virus	2209	3.3442	36.8	29.86	40.02	5	1	0	High-quality	100	AAI-based (medium-confidence)	0	1		1	20	169	62.19
os1-k141_23445	Unclassified Virus	1844	3.26576	30.4	16.84	41.76	3	0	0	High-quality	97.86	AAI-based (medium-confidence)	0	1	no viral genes detected	1	33.33	79	24.02
os1-k141_22413	Unclassified Virus	2291	3.36003	44.4	13.6	41.55	7	0	0	High-quality	100	AAI-based (medium-confidence)	0	1	no viral genes detected	1	14.29	85	37.74
os1-k141_21106	Podoviridae	36720	4.5649	35.4	0.57	44.39	41	22	0	High-quality	99.57	AAI-based (high-confidence)	0	1		1	2.44	68	24.07
os1-k141_19511	Unknown	7265	3.86124	21.2	59.91	43.12	4	1	0	High-quality	100	AAI-based (high-confidence)	0	1		1	25	1149	243.59
os1-k141_1892	Unknown	4706	3.67265	20	32.42	43.71	2	1	0	High-quality	100	AAI-based (high-confidence)	0	1		1	50	452	90.4
os1-k141_17484	Unknown	6006	3.77859	18.8	75.8	41.92	3	1	0	High-quality	92.71	AAI-based (medium-confidence)	0	1		1	33.33	1375	258.5
os1-k141_15997	Unclassified Virus	2074	3.31681	72.7	9.56	42.96	7	0	0	Complete	100	DTR (high-confidence)	0	1.1	no viral genes detected	1	14.29	52	37.8
os1-k141_13552	Unknown	4454	3.64875	27.1	29.61	43.83	3	1	0	High-quality	97.97	AAI-based (high-confidence)	0	1		1	33.33	408	110.57
os1-k141_11316	Unknown	6118	3.78661	21.9	49.32	37.95	5	1	0	High-quality	100	AAI-based (medium-confidence)	0	1		1	20	583	127.68
ML3-k141_8952	Microviridae	4385	3.64197	60	2.99	52.93	7	6	0	High-quality	94.49	AAI-based (high-confidence)	0	1		1	14.29	40	24
ML3-k141_854	Unclassified Virus	1805	3.25648	63.3	25.93	44.76	3	1	0	High-quality	100	AAI-based (medium-confidence)	0	1		1	33.33	49	31.02
ML3-k141_7694	Unclassified Virus	2115	3.32531	58.69	55.56	40.05	4	0	0	High-quality	100	AAI-based (medium-confidence)	0	1	no viral genes detected	2	50	155	90.97
[truncated: 1,474 more rows]
