# Supplementary material for: A remarkably diverse and well-organized virus community in a filter-feeding oyster
Source: Microbiome. 2023 Jan 7;11:2. doi: 10.1186/s40168-022-01431-8 (PMC9825006; doi:10.1186/s40168-022-01431-8)
Supplement: Supplementary file 16 — Additional file 15: Table S3. Counts of auxiliary metabolic genes (AMGs) and corresponding KEGG categories. [file 40168_2022_1431_MOESM15_ESM.xlsx]

## Sheet: Sheet1
Metabolism	Pathway	Total AMGs
Carbohydrate metabolism	Glycolysis / Gluconeogenesis	8
	Citrate cycle (TCA cycle)	2
	Pentose phosphate pathway	134
	Pentose and glucuronate interconversions	40
	Fructose and mannose metabolism	153
	Galactose metabolism	86
	Ascorbate and aldarate metabolism	26
	Starch and sucrose metabolism	9
	Amino sugar and nucleotide sugar metabolism	593
	Pyruvate metabolism	18
	Glyoxylate and dicarboxylate metabolism	2
	Propanoate metabolism	3
	Butanoate metabolism	4
	C5-Branched dibasic acid metabolism	2
	Inositol phosphate metabolism	1
Energy metabolism	Oxidative phosphorylation	3
	Photosynthesis	598
	Photosynthesis - antenna proteins	36
	Carbon fixation in photosynthetic organisms	17
	Carbon fixation pathways in prokaryotes	18
	Methane metabolism	39
	Sulfur metabolism	707
Lipid metabolism	Fatty acid biosynthesis	16
	Fatty acid degradation	1
	Glycerolipid metabolism	9
	Glycerophospholipid metabolism	1
	Sphingolipid metabolism	22
	Biosynthesis of unsaturated fatty acids	2
Nucleotide metabolism	Purine metabolism	67
	Pyrimidine metabolism	2
Amino acid metabolism	Alanine, aspartate and glutamate metabolism	372
	Glycine, serine and threonine metabolism	56
	Cysteine and methionine metabolism	1815
	Valine, leucine and isoleucine degradation	4
	Valine, leucine and isoleucine biosynthesis	2
	Lysine biosynthesis	4
	Arginine biosynthesis	1
	Arginine and proline metabolism	164
	Histidine metabolism	1
	Tyrosine metabolism	1
	Phenylalanine metabolism	2
	Phenylalanine, tyrosine and tryptophan biosynthesis	1
	beta-Alanine metabolism	3
	Phosphonate and phosphinate metabolism	29
	Glutathione metabolism	87
Glycan biosynthesis and metabolism	N-Glycan biosynthesis	53
	Various types of N-glycan biosynthesis	4
	Glycosaminoglycan biosynthesis - heparan sulfate / heparin	1
	Glycosaminoglycan degradation	1
	Glycosylphosphatidylinositol (GPI)-anchor biosynthesis	2
	Glycosphingolipid biosynthesis - lacto and neolacto series	26
	Glycosphingolipid biosynthesis - globo and isoglobo series	1
	Glycosphingolipid biosynthesis - ganglio series	1
	Lipopolysaccharide biosynthesis	169
	Peptidoglycan biosynthesis	22
	Other glycan degradation	23
	Lipoarabinomannan (LAM) biosynthesis	1
	Arabinogalactan biosynthesis - Mycobacterium	8
Metabolism of cofactors and vitamins	Thiamine metabolism	4
	Riboflavin metabolism	2
	Nicotinate and nicotinamide metabolism	666
	Pantothenate and CoA biosynthesis	9
	Biotin metabolism	17
	Folate biosynthesis	1127
	One carbon pool by folate	551
	Retinol metabolism	1
	Porphyrin and chlorophyll metabolism	400
	Ubiquinone and other terpenoid-quinone biosynthesis	48
Metabolism of terpenoids and polyketides	Polyketide sugar unit biosynthesis	90
	Biosynthesis of vancomycin group antibiotics	62
Biosynthesis of other secondary metabolites	Phenylpropanoid biosynthesis	3
	Stilbenoid, diarylheptanoid and gingerol biosynthesis	3
	Flavonoid biosynthesis	3
	Penicillin and cephalosporin biosynthesis	1
	Streptomycin biosynthesis	84
	Acarbose and validamycin biosynthesis	74
	Staurosporine biosynthesis	70
	Prodigiosin biosynthesis	5
	Biosynthesis of secondary metabolites - other antibiotics	139
	Biosynthesis of secondary metabolites - unclassified	3
Xenobiotics biodegradation and metabolism	Benzoate degradation	1
	Chloroalkane and chloroalkene degradation	1
	Styrene degradation	1
	Naphthalene degradation	1
	Steroid degradation	1
	Metabolism of xenobiotics by cytochrome P450	1
	Drug metabolism - cytochrome P450	1
	Drug metabolism - other enzymes	1
Sulfur relay system	Sulfur relay system	248
